# Supplementary material for: Yeast Saccharomyces cerevisiae adiponectin receptor homolog Izh2 is involved in the regulation of zinc, phospholipid and pH homeostasis
Source: Royal Society of Chemistry journal article supplement (doi:10.1039/c5mt00095e), 2015-01-01
Supplement: c5mt00095e1.xlsx [file c5mt00095e1.xlsx]

## Sheet: Supplementary Table 3
Supplementary Table 3: Effect of izh2Δ deletion on the transcriptome
Values in the columns were calculated using Bioconducto limma package (function toptable(adjust=“fdr”)).
log2-fold-change	estimated log2-fold-change corresponding to the izh2Δ compared to the reference strain
Average log2-expression	average log2-expression for the probe over all arrays and channels
t-stat	moderated t-statistics
logg-odds diff. expr.	log-odds that the gene is differentially expressed

## Sheet: Data
gpr row #	Block	Row	Column	ORF	Name	log2-fold-change	Average log2-expression	t-stat	raw p-value	adjusted p-value	logg-odds diff. expr.
6489	24	15	9	YOR203W	YOR203W	2.03834	7.88036	21.119	2.61531e-07	0.0034122	5.36502
10793	40	12	9	YML123C	PHO84	1.7381	11.449	17.1863	9.97534e-07	0.00646953	4.82692
6490	24	15	10	YOR203W	YOR203W	1.70311	7.92581	15.9037	1.64688e-06	0.00646953	4.58807
1480	6	8	8	YHR215W	PHO12	1.42066	8.48	15.4517	1.98345e-06	0.00646953	4.49408
1479	6	8	7	YHR215W	PHO12	1.34282	8.29849	14.3293	3.22167e-06	0.00840663	4.23504
10794	40	12	10	YML123C	PHO84	1.63691	11.5333	12.9031	6.30231e-06	0.0137044	3.84344
10281	38	14	9	YOL002C	IZH2	-3.03438	7.60347	-12.2902	8.59202e-06	0.0160143	3.64961
5291	20	8	11	YHR136C	SPL2	1.31265	8.18952	11.2688	1.48877e-05	0.02428	3.286
9844	37	4	4	YDR481C	PHO8	1.06931	9.41272	10.9213	1.81377e-05	0.0250795	3.14932
6321	24	5	1	YER072W	VTC1	0.938066	10.2257	10.7219	2.03672e-05	0.0250795	3.06761
3548	14	1	12	YAR071W	PHO11	0.923542	8.02411	10.1898	2.80225e-05	0.0250795	2.83723
5949	22	15	13	YOR202W	HIS3	2.5056	7.10162	10.1037	2.95484e-05	0.0250795	2.79818
5648	21	13	16	YNL160W	YGP1	0.890949	9.17162	10.0591	3.03767e-05	0.0250795	2.77773
6322	24	5	2	YER072W	VTC1	0.894639	10.1907	10.0211	3.11028e-05	0.0250795	2.76021
1209	5	8	9	YJL012C	VTC4	1.16726	9.34781	9.92157	3.31007e-05	0.0250795	2.71384
5647	21	13	15	YNL160W	YGP1	0.86458	9.30695	9.85944	3.44223e-05	0.0250795	2.68453
12716	47	13	12	YNL185C	MRPL19	0.879004	8.56718	9.77052	3.64202e-05	0.0250795	2.64208
5950	22	15	14	YOR202W	HIS3	2.39975	7.05773	9.73116	3.73466e-05	0.0250795	2.62311
1210	5	8	10	YJL012C	VTC4	1.14894	9.21617	9.68719	3.84134e-05	0.0250795	2.60178
5292	20	8	12	YHR136C	SPL2	1.21511	7.9401	9.67904	3.86149e-05	0.0250795	2.59781
9804	37	1	12	YBR093C	PHO5	1.0081	9.16871	9.61017	4.03672e-05	0.0250795	2.56406
9803	37	1	11	YBR093C	PHO5	1.0158	9.22344	9.4759	4.40509e-05	0.0261242	2.49722
5346	20	12	2	YML022W	APT1	0.835989	9.33486	9.19941	5.29132e-05	0.0300156	2.35511
5345	20	12	1	YML022W	APT1	0.800013	9.29401	8.61072	7.94787e-05	0.0422289	2.03118
2653	10	13	13	YMR242C	RPL20a	0.851853	12.1948	8.55862	8.24867e-05	0.0422289	2.00104
9843	37	4	3	YDR481C	PHO8	0.987307	9.80425	8.52956	8.42207e-05	0.0422289	1.98412
10022	37	15	6	YPL019C	VTC3	1.14511	9.54084	8.47817	8.73902e-05	0.0422289	1.954
11849	44	10	9	YKL143W	LTV1	0.717226	9.40475	8.19458	0.000107525	0.050103	1.78326
5058	19	11	2	YLR300W	EXG1	0.726533	10.7982	8.09635	0.000115695	0.0520506	1.7223
10021	37	15	5	YPL019C	VTC3	1.13751	9.57509	7.87594	0.000136733	0.0594653	1.58193
5057	19	11	1	YLR300W	EXG1	0.717287	10.8577	7.67694	0.000159532	0.0671424	1.45084
2654	10	13	14	YMR242C	RPL20a	0.814741	12.4552	7.37551	0.000202799	0.0826851	1.24403
6272	24	1	16	YBL002W	HTB2	-0.62725	10.8738	-7.18282	0.000237419	0.0938668	1.1064
12715	47	13	11	YNL185C	MRPL19	0.887068	9.10754	7.13049	0.000247948	0.094271	1.06826
6271	24	1	15	YBL002W	HTB2	-0.644841	11.0114	-7.10677	0.000252892	0.094271	1.05088
11108	41	15	4	YOR280C	FSH3	0.672958	8.45506	6.95354	0.000287676	0.101101	0.936884
1172	5	6	4	YGL258W	VEL1	-1.06426	7.06747	-7.94963	0.000295873	0.101101	0.537897
10830	40	14	14	YNR076W	PAU6	-0.638351	9.11952	-6.90927	0.000298714	0.101101	0.90341
3547	14	1	11	YAR071W	PHO11	0.856147	7.86676	6.89564	0.000302209	0.101101	0.893054
7956	30	5	4	YER037W	PHM8	0.578657	8.21205	6.51893	0.000419843	0.136436	0.597501
11107	41	15	3	YOR280C	FSH3	0.607788	8.3804	6.49543	0.000428748	0.136436	0.57845
7955	30	5	3	YER037W	PHM8	0.689934	8.36057	6.43844	0.000451249	0.139443	0.531936
211	1	14	3	YOL022C	TSR4	0.569071	9.56855	6.41816	0.000459574	0.139443	0.51528
212	1	14	4	YOL022C	TSR4	0.58147	9.7042	6.36942	0.000480308	0.142422	0.475014
2586	10	9	10	YJL117W	PHO86	0.551563	8.97957	6.32264	0.000501203	0.145315	0.436071
12260	46	2	4	YBR296C	PHO89	0.84463	9.56363	6.26275	0.000529475	0.150175	0.385764
10348	39	1	12	YBR092C	PHO3	0.71943	9.2311	6.21191	0.000554887	0.154034	0.342678
2585	10	9	9	YJL117W	PHO86	0.531549	9.15112	6.05719	0.000641132	0.174268	0.209285
4084	16	1	4	YAR075W	YAR075W	-0.526457	10.0929	-6.02773	0.000659217	0.175527	0.183498
10748	40	9	12	YJL188C	BUD19	-0.544431	9.62376	-5.9636	0.000700605	0.182167	0.126932
3815	15	1	7	YBR072W	HSP26	0.534139	7.35414	5.94657	0.000712082	0.182167	0.111811
12386	46	10	2	YKR019C	IRS4	0.514828	8.62635	5.89702	0.000746705	0.18461	0.0675675
10839	40	15	7	YOR173W	DCS2	0.559126	7.56831	5.89254	0.000749928	0.18461	0.0635496
10747	40	9	11	YJL188C	BUD19	-0.560371	9.6132	-5.78728	0.000830353	0.193752	-0.0317133
6287	24	2	15	YBR265W	TSC10	-0.504868	8.14153	-5.78629	0.00083115	0.193752	-0.0326133
4083	16	1	3	YAR075W	YAR075W	-0.507037	10.17	-5.77196	0.000842844	0.193752	-0.0457107
6288	24	2	16	YBR265W	TSC10	-0.531969	8.12459	-5.76098	0.000851929	0.193752	-0.0557673
12327	46	6	7	YGL104C	VPS73	0.517125	8.1803	5.73591	0.000873093	0.193752	-0.0787999
3816	15	1	8	YBR072W	HSP26	0.53021	7.39609	5.73233	0.00087617	0.193752	-0.0821041
4098	16	2	2	YCL009C	ILV6	-0.49815	9.67332	-5.70618	0.000898966	0.19548	-0.106243
3455	13	12	15	YMR105C	PGM2	0.743875	8.03186	5.65412	0.000946364	0.200289	-0.154606
12328	46	6	8	YGL104C	VPS73	0.55617	8.28232	5.64836	0.000951781	0.200289	-0.159985
10829	40	14	13	YNR076W	PAU6	-0.567589	9.14812	-5.54223	0.00105806	0.214183	-0.259963
10840	40	15	8	YOR173W	DCS2	0.487426	7.49716	5.53962	0.00106085	0.214183	-0.262451
11712	44	1	16	YAL040C	CLN3	-0.569133	9.37333	-5.53257	0.00106839	0.214183	-0.269154
9382	35	9	6	YJR109C	CPA2	-0.52638	8.67862	-5.49628	0.00110818	0.214183	-0.303796
10675	40	5	3	YER044C	ERG28	-0.490511	10.3824	-5.49113	0.00111396	0.214183	-0.308734
8095	30	13	15	YMR304C-A	YMR304C-A	-0.48407	11.6351	-5.48817	0.0011173	0.214183	-0.311569
3218	12	15	2	YOR103C	OST2	0.560267	9.85799	5.46792	0.00114043	0.214183	-0.33101
10347	39	1	11	YBR092C	PHO3	0.644402	9.43762	5.46042	0.00114914	0.214183	-0.338229
3054	12	4	14	YDR210W	YDR210W	-0.515412	9.2544	-5.41768	0.0012002	0.219208	-0.379537
9381	35	9	5	YJR109C	CPA2	-0.470997	8.51004	-5.39244	0.00123156	0.219208	-0.404073
10242	38	12	2	YML128C	MSC1	0.469792	7.51691	5.38738	0.00123794	0.219208	-0.408996
6774	25	16	6	YPR016C	TIF6	0.56672	10.4756	5.38316	0.00124331	0.219208	-0.413113
1314	5	15	2	YOR383C	FIT3	-0.477431	9.998	-5.34757	0.00128957	0.222718	-0.447923
3217	12	15	1	YOR103C	OST2	0.579204	10.0352	5.32391	0.0013214	0.222718	-0.471177
7241	27	11	9	YLR304C	ACO1	0.523284	8.38908	5.31695	0.00133093	0.222718	-0.478033
10282	38	14	10	YOL002C	IZH2	-2.42147	7.13201	-5.31654	0.00133149	0.222718	-0.478438
10577	39	16	1	YPR121W	THI22	0.495602	9.21795	5.30217	0.00135143	0.223191	-0.492629
1277	5	12	13	YMR143W	RPS16a	0.609077	12.4879	5.23129	0.00145476	0.237253	-0.563075
9071	34	6	15	YFR053C	HXK1	0.795746	8.94022	5.19274	0.00151466	0.239268	-0.601733
11434	43	1	10	YBR054W	YRO2	0.64858	8.27532	5.18593	0.00152553	0.239268	-0.608589
321	2	4	1	YDR209C	YDR209C	-0.453113	9.46991	-5.18394	0.00152871	0.239268	-0.610585
11171	42	2	3	YBR200W	BEM1	0.502073	10.0574	5.17068	0.00155019	0.239268	-0.623965
8362	31	13	10	YNL217W	YNL217W	0.452378	9.82352	5.15753	0.0015718	0.239268	-0.637252
11629	43	13	13	YNL135C	FPR1	0.581932	10.4143	5.1543	0.00157715	0.239268	-0.640514
10241	38	12	1	YML128C	MSC1	0.450626	7.51379	5.12	0.00163536	0.245248	-0.675327
12486	46	16	6	YPL219W	PCL8	0.44865	9.5623	5.06842	0.00172749	0.255489	-0.728044
11630	43	13	14	YNL135C	FPR1	0.595206	10.4196	5.06014	0.00174282	0.255489	-0.73655
10749	40	9	13	YJR010C-A	SPC1	-0.43663	8.89004	-5.00715	0.00184455	0.266001	-0.791233
331	2	4	11	YDR158W	HOM2	-0.436635	10.229	-5.00175	0.0018553	0.266001	-0.796836
11282	42	9	2	YJL153C	INO1	-0.491572	9.90109	-4.98651	0.00188597	0.267459	-0.812658
5278	20	7	14	YGR148C	RPL24b	-0.433789	10.7503	-4.94834	0.00196533	0.275717	-0.852472
10676	40	5	4	YER044C	ERG28	-0.433771	10.5726	-4.93024	0.00200425	0.278186	-0.871433
12093	45	8	13	YJL051W	IRC8	0.429247	8.39263	4.92049	0.00202559	0.278188	-0.881675
8361	31	13	9	YNL217W	YNL217W	0.427554	9.85444	4.90252	0.00206556	0.280722	-0.900581
9460	35	14	4	YOL053C-A	YOL053C-A	0.470909	7.17676	4.871	0.00213781	0.285813	-0.933876
9072	34	6	16	YFR053C	HXK1	0.74277	8.65536	4.86715	0.00214683	0.285813	-0.937954
11433	43	1	9	YBR054W	YRO2	0.642873	8.17483	4.85495	0.0021757	0.286731	-0.950902
11281	42	9	1	YJL153C	INO1	-0.469443	9.94161	-4.83332	0.00222794	0.290586	-0.973905
5390	20	14	14	YNL303W	YNL303W	-0.448849	7.77013	-4.82118	0.00225786	0.290586	-0.986848
12158	45	12	14	YMR179W	SPT21	0.42647	8.28148	4.8156	0.00227177	0.290586	-0.992808
7887	29	17	15	YPR160W	GPH1	0.429089	6.87057	4.76778	0.00239495	0.303368	-1.04409
5935	22	14	15	YNR013C	PHO91	0.419537	8.55511	4.74387	0.00245933	0.307303	-1.06988
1981	8	5	13	YER053C	PIC2	0.425468	8.1156	4.71661	0.0025351	0.307303	-1.0994
6269	24	1	13	YBL048W	YBL048W	-0.462739	6.80815	-4.71022	0.00255324	0.307303	-1.10634
12264	46	2	8	YBR294W	SUL1	0.434245	7.86643	4.70538	0.00256706	0.307303	-1.1116
10448	39	7	16	YHR055C	CUP1-2	-0.468905	10.003	-4.69309	0.00260257	0.307303	-1.12497
3331	13	5	3	YFL014W	HSP12	0.424784	6.80887	4.69081	0.00260919	0.307303	-1.12745
10176	38	7	16	YGR213C	RTA1	-0.412404	7.76118	-4.68902	0.00261445	0.307303	-1.12941
5173	20	1	5	YAL068C	PAU8	-0.441554	8.33807	-4.67926	0.00264316	0.307662	-1.14005
1313	5	15	1	YOR383C	FIT3	-0.416911	10.0549	-4.66849	0.00267527	0.307662	-1.15181
4929	19	3	1	YDR033W	MRH1	0.516563	10.0192	4.66418	0.00268824	0.307662	-1.15653
6334	24	5	14	YER066W	RRT13	-0.415364	7.72245	-4.65144	0.00272699	0.308751	-1.17048
6357	24	7	5	YGR248W	SOL4	0.437387	6.5988	4.63735	0.00277057	0.308751	-1.18594
11760	44	4	16	YDR194C	MSS116	-0.507074	9.1656	-4.62712	0.00280269	0.308751	-1.19719
10175	38	7	15	YGR213C	RTA1	-0.405791	7.90667	-4.62516	0.00280889	0.308751	-1.19935
1857	7	15	1	YOR382W	FIT2	-0.426419	9.15465	-4.62007	0.00282509	0.308751	-1.20496
6493	24	15	13	YOR201C	MRM1	-0.437608	8.64079	-4.61549	0.00283974	0.308751	-1.21
10847	40	15	15	YOR169C	YOR169C	-0.436955	8.81356	-4.59768	0.00289749	0.311076	-1.22966
10350	39	1	14	YBR138C	YBR138C	-0.672561	8.79671	-4.58754	0.00293098	0.311076	-1.24088
12565	47	4	5	YDR534C	FIT1	-0.413206	6.71716	-4.58703	0.00293265	0.311076	-1.24144
3456	13	12	16	YMR105C	PGM2	0.419143	8.11797	4.56758	0.00299813	0.314665	-1.26302
3332	13	5	4	YFL014W	HSP12	0.399993	6.8151	4.56272	0.00301472	0.314665	-1.26841
30	1	2	14	YCR008W	SAT4	0.39845	8.72518	4.53146	0.00312405	0.323488	-1.30324
5875	22	11	3	YLR158C	ASP3-3	0.490791	11.1644	4.51156	0.00319593	0.328325	-1.3255
1278	5	12	14	YMR143W	RPS16a	0.533309	12.2952	4.49794	0.00324618	0.330882	-1.34077
1461	6	7	5	YGR233C	PHO81	0.400863	7.95724	4.46018	0.00339017	0.340824	-1.38328
8064	30	11	16	YLR160C	ASP3-4	0.419467	11.1366	4.45869	0.00339597	0.340824	-1.38495
12443	46	13	11	YMR319C	FET4	-0.480255	9.44889	-4.44975	0.00343118	0.34173	-1.39506
12444	46	13	12	YMR319C	FET4	-0.40642	9.64404	-4.43626	0.00348503	0.343277	-1.41033
220	1	14	12	YOL018C	TLG2	0.38933	8.45783	4.43272	0.00349933	0.343277	-1.41435
10565	39	15	5	YPL018W	CTF19	0.533362	7.21597	4.42009	0.00355085	0.343339	-1.42868
12208	45	15	16	YOR369C	RPS12	0.400185	12.8054	4.41744	0.00356176	0.343339	-1.43169
4524	17	11	12	YLR250W	SSP120	0.512139	9.2175	4.39863	0.0036403	0.343339	-1.45309
8022	30	9	6	YJR007W	SUI2	0.383579	9.85117	4.39791	0.00364334	0.343339	-1.45391
4930	19	3	2	YDR033W	MRH1	0.474214	10.4016	4.39522	0.00365475	0.343339	-1.45698
2039	8	9	7	YJL158C	CIS3	0.383518	12.1359	4.39025	0.00367592	0.343339	-1.46264
9727	36	13	15	YMR217W	GUA1	0.527217	10.9284	4.3822	0.00371049	0.343339	-1.47183
8266	31	7	10	YHR096C	HXT5	0.382334	7.08692	4.36432	0.00378859	0.346071	-1.49229
1360	5	17	16	YPR156C	TPO3	0.460011	8.28682	4.36331	0.00379307	0.346071	-1.49345
7888	29	17	16	YPR160W	GPH1	0.381451	6.86921	4.34638	0.00386881	0.348166	-1.51287
8021	30	9	5	YJR007W	SUI2	0.381328	9.57406	4.34258	0.003886	0.348166	-1.51723
11173	42	2	5	YBR246W	RRT2	0.378531	8.20568	4.34037	0.00389608	0.348166	-1.51978
1462	6	7	6	YGR233C	PHO81	0.401515	8.11113	4.32935	0.00394666	0.348395	-1.53245
9389	35	9	13	YJR105W	ADO1	0.583627	11.4282	4.31939	0.003993	0.348395	-1.54393
1975	8	5	7	YER011W	TIR1	-0.480499	12.0182	-4.31685	0.0040049	0.348395	-1.54685
12157	45	12	13	YMR179W	SPT21	0.381516	7.96824	4.3136	0.00402021	0.348395	-1.55061
12438	46	13	6	YNL043C	YNL043C	-0.403369	9.74054	-4.30808	0.00404638	0.348395	-1.55698
3053	12	4	13	YDR210W	YDR210W	-0.423411	9.18334	-4.30123	0.00407906	0.348395	-1.5649
8265	31	7	9	YHR096C	HXT5	0.378153	7.34174	4.29988	0.00408557	0.348395	-1.56647
3761	14	15	1	YOR200W	YOR200W	-0.420119	7.51903	-4.27689	0.00419767	0.354464	-1.5931
12494	46	16	14	YPL215W	CBP3	0.373382	9.06055	4.27419	0.00421108	0.354464	-1.59623
2993	12	1	1	YAL063C	FLO9	-0.372223	8.52625	-4.26849	0.00423946	0.354566	-1.60285
9390	35	9	14	YJR105W	ADO1	0.534784	11.4545	4.24822	0.00434228	0.359271	-1.62644
12180	45	14	4	YOL158C	ENB1	-0.518531	8.94641	-4.24657	0.0043508	0.359271	-1.62837
8096	30	13	16	YMR304C-A	YMR304C-A	-0.406205	11.556	-4.22918	0.00444139	0.359459	-1.64866
7424	28	5	16	YEL017C-A	PMP2	0.382478	8.53243	4.22342	0.00447181	0.359459	-1.65539
10619	40	1	11	YBL018C	POP8	-0.372416	8.54298	-4.21825	0.0044994	0.359459	-1.66145
6369	24	8	1	YIL060W	YIL060W	-0.40025	9.94668	-4.21702	0.00450594	0.359459	-1.66288
11058	41	12	2	YMR095C	SNO1	-0.367279	7.8827	-4.21183	0.00453386	0.359459	-1.66896
1858	7	15	2	YOR382W	FIT2	-0.394998	9.06788	-4.2106	0.00454049	0.359459	-1.6704
3299	13	3	3	YDR074W	TPS2	0.470113	9.23372	4.20959	0.00454593	0.359459	-1.67158
11437	43	1	13	YBR052C	RFS1	-0.428731	11.2657	-4.20215	0.00458639	0.360473	-1.68032
12566	47	4	6	YDR534C	FIT1	-0.367968	6.74165	-4.1941	0.00463053	0.361763	-1.68976
6370	24	8	2	YIL060W	YIL060W	-0.389795	9.77356	-4.18884	0.0046597	0.361875	-1.69595
12422	46	12	6	YMR001C	CDC5	0.365324	7.99706	4.17548	0.00473455	0.364228	-1.71166
12446	46	13	14	YNL039W	BDP1	0.366698	8.74018	4.17349	0.00474583	0.364228	-1.71401
12048	45	5	16	YFL037W	TUB2	0.371113	9.04291	4.16324	0.00480437	0.365354	-1.7261
4521	17	11	9	YLR297W	YLR297W	0.371672	7.75715	4.16113	0.00481651	0.365354	-1.72859
12385	46	10	1	YKR019C	IRS4	0.363839	8.80281	4.14763	0.00489501	0.36809	-1.74454
12491	46	16	11	YPL169C	MEX67	0.367945	8.90429	4.14525	0.004909	0.36809	-1.74735
4518	17	11	6	YLR299W	ECM38	0.362534	9.1542	4.13558	0.00496627	0.370257	-1.7588
9156	34	12	4	YLR461W	PAU4	-0.420747	8.58288	-4.11924	0.00506474	0.374181	-1.77818
5001	19	7	9	YHL046C	PAU13	-0.385142	7.97004	-4.11735	0.00507627	0.374181	-1.78042
12094	45	8	14	YJL051W	IRC8	0.359554	8.33431	4.11116	0.00511428	0.374551	-1.78779
4523	17	11	11	YLR250W	SSP120	0.502669	9.19857	4.1072	0.0051387	0.374551	-1.79249
7405	28	4	13	YDR226W	ADK1	-0.357142	10.6274	-4.09563	0.00521087	0.376314	-1.80626
12470	46	15	6	YOR230W	WTM1	0.484843	11.1331	4.09409	0.00522057	0.376314	-1.8081
2026	8	8	10	YIL040W	APQ12	-0.361606	9.13752	-4.08811	0.0052584	0.376958	-1.81523
708	3	11	4	YLR237W	THI7	0.386984	7.7336	4.07744	0.00532668	0.379105	-1.82797
10848	40	15	16	YOR169C	YOR169C	-0.428016	8.79956	-4.06351	0.0054172	0.379105	-1.84462
7939	30	4	3	YDR281C	PHM6	0.565778	7.3134	4.05848	0.00545037	0.379105	-1.85065
8533	32	7	5	YGR256W	GND2	0.452896	7.73261	4.05792	0.00545406	0.379105	-1.85132
4517	17	11	5	YLR299W	ECM38	0.354975	9.37947	4.0514	0.00549731	0.379105	-1.85913
8131	30	16	3	YPL157W	TGS1	0.353856	8.67646	4.0494	0.0055107	0.379105	-1.86153
162	1	11	2	YLR286C	CTS1	0.370147	11.7039	4.04704	0.00552648	0.379105	-1.86436
10774	40	11	6	YLR219W	MSC3	0.355929	8.49462	4.04457	0.00554309	0.379105	-1.86733
10838	40	15	6	YOR221C	MCT1	0.353231	9.14148	4.04026	0.00557219	0.379105	-1.8725
6270	24	1	14	YBL048W	YBL048W	-0.451406	6.77821	-4.03927	0.00557892	0.379105	-1.87369
5002	19	7	10	YHL046C	PAU13	-0.38353	7.86308	-4.02242	0.00569442	0.384949	-1.89395
12259	46	2	3	YBR296C	PHO89	0.671401	9.36975	3.98934	0.00592896	0.398738	-1.93388
12445	46	13	13	YNL039W	BDP1	0.346432	8.54753	3.96726	0.00609141	0.401698	-1.96062
11545	43	8	9	YIL176C	PAU14	-0.398081	8.21304	-3.96119	0.00613694	0.401698	-1.96799
1775	7	9	15	YJR121W	ATP2	0.354715	10.364	3.96106	0.00613795	0.401698	-1.96815
12492	46	16	12	YPL169C	MEX67	0.373756	9.0643	3.96076	0.00614019	0.401698	-1.96852
11235	42	6	3	YGL010W	YGL010W	-0.394207	7.7374	-3.95863	0.00615629	0.401698	-1.97111
11252	42	7	4	YGR131W	FHN1	-0.460317	9.20869	-3.95844	0.0061577	0.401698	-1.97133
7	1	1	7	YBL085W	BOI1	-0.351826	6.98886	-3.94151	0.00628708	0.40253	-1.99192
5361	20	13	1	YMR255W	GFD1	0.368238	8.2892	3.93897	0.00630678	0.40253	-1.99502
2887	11	11	7	YLR243W	GPN3	0.353849	8.61409	3.93814	0.00631325	0.40253	-1.99603
6333	24	5	13	YER066W	RRT13	-0.362354	7.65711	-3.93351	0.00634935	0.40253	-2.00168
7242	27	11	10	YLR304C	ACO1	0.537909	8.61907	3.92962	0.00637984	0.40253	-2.00642
7384	28	3	8	YDL048C	STP4	0.343324	6.81081	3.92474	0.00641829	0.40253	-2.01237
5362	20	13	2	YMR255W	GFD1	0.348677	8.21965	3.92211	0.00643911	0.40253	-2.01558
5174	20	1	6	YAL068C	PAU8	-0.499645	8.36422	-3.92151	0.00644385	0.40253	-2.01631
707	3	11	3	YLR237W	THI7	0.342295	7.45829	3.91796	0.00647218	0.40253	-2.02065
2884	11	11	4	YLR245C	CDD1	0.354325	7.22535	3.91711	0.00647898	0.40253	-2.02169
9289	35	3	9	YDR045C	RPC11	-0.342044	8.03224	-3.9129	0.00651271	0.402708	-2.02683
4227	16	10	3	YKL163W	PIR3	0.407684	10.3213	3.90478	0.00657835	0.402881	-2.03677
12207	45	15	15	YOR369C	RPS12	0.393451	12.9596	3.90285	0.00659408	0.402881	-2.03913
5846	22	9	6	YJL223C	PAU1	-0.393262	8.3335	-3.8979	0.00663447	0.402881	-2.04518
8041	30	10	9	YKL224C	PAU16	-0.438945	8.44678	-3.89735	0.00663903	0.402881	-2.04586
4951	19	4	7	YDR366C	YDR366C	-0.387336	9.24322	-3.89183	0.0066845	0.403386	-2.05262
6773	25	16	5	YPR016C	TIF6	0.493952	10.6662	3.88885	0.00670919	0.403386	-2.05628
9362	35	8	2	YIL172C	IMA3	0.420044	7.20683	3.88187	0.0067675	0.405022	-2.06485
12564	47	4	4	YDR488C	PAC11	0.573086	7.56955	3.87459	0.00682883	0.405022	-2.07379
10620	40	1	12	YBL018C	POP8	-0.354152	8.45902	-3.87442	0.00683029	0.405022	-2.074
6456	24	13	8	YMR299C	DYN3	0.537818	8.25666	3.86546	0.00690663	0.405022	-2.08502
11672	43	16	8	YPL266W	DIM1	0.368637	7.57284	3.86124	0.0069429	0.405022	-2.09021
7383	28	3	7	YDL048C	STP4	0.364796	6.91831	3.85888	0.00696325	0.405022	-2.09311
2472	10	2	8	YBR166C	TYR1	-0.336609	8.40842	-3.85734	0.00697661	0.405022	-2.09501
9413	35	11	5	YLR314C	CDC3	0.559782	8.98086	3.8564	0.00698475	0.405022	-2.09617
11461	43	3	5	YDR055W	PST1	0.343687	8.4244	3.8436	0.00709684	0.40738	-2.11195
8063	30	11	15	YLR160C	ASP3-4	0.350228	10.3162	3.84136	0.00711672	0.40738	-2.11472
8059	30	11	11	YLR162W	YLR162W	-0.360904	9.59003	-3.84109	0.00711909	0.40738	-2.11505
7940	30	4	4	YDR281C	PHM6	0.4901	7.18899	3.83548	0.00716896	0.408443	-2.12197
332	2	4	12	YDR158W	HOM2	-0.334056	10.5893	-3.83086	0.00721041	0.408889	-2.12769
6327	24	5	7	YER026C	CHO1	-0.337661	10.5011	-3.82474	0.00726565	0.408889	-2.13525
9459	35	14	3	YOL053C-A	YOL053C-A	0.447197	7.20431	3.81569	0.0073482	0.408889	-2.14646
10352	39	1	16	YBR090C-A	YBR090C-A	-0.506284	8.47953	-3.81465	0.00735773	0.408889	-2.14774
6420	24	11	4	YLR157C	ASP3-2	0.345947	11.2351	3.81369	0.00736657	0.408889	-2.14893
8292	31	9	4	YJR151C	DAN4	-0.419078	9.51106	-3.81212	0.00738102	0.408889	-2.15088
11585	43	11	1	YLR324W	PEX30	0.357085	7.64737	3.81048	0.00739616	0.408889	-2.15291
252	1	16	12	YPL225W	YPL225W	0.371427	10.0743	3.79712	0.00752078	0.410538	-2.16948
5778	22	5	2	YER073W	ALD5	-0.333364	9.63666	-3.79698	0.00752217	0.410538	-2.16966
9250	35	1	2	YBR050C	REG2	0.403688	6.83104	3.79613	0.00753018	0.410538	-2.17072
6267	24	1	11	YBL004W	UTP20	-0.33509	6.86289	-3.78643	0.00762221	0.410538	-2.18277
11733	44	3	5	YDL112W	TRM3	-0.339196	8.57483	-3.78477	0.00763812	0.410538	-2.18484
2883	11	11	3	YLR245C	CDD1	0.332888	7.37632	3.78346	0.00765068	0.410538	-2.18647
8291	31	9	3	YJR151C	DAN4	-0.375245	9.74745	-3.77907	0.00769284	0.410538	-2.19192
8519	32	6	7	YGL087C	MMS2	-0.352348	7.69175	-3.7675	0.00780546	0.410538	-2.20634
322	2	4	2	YDR209C	YDR209C	-0.369963	9.64604	-3.76611	0.00781912	0.410538	-2.20808
9311	35	4	15	YDR378C	LSM6	-0.382692	9.65202	-3.76509	0.00782917	0.410538	-2.20935
10460	39	8	12	YIR039C	YPS6	0.336508	6.98231	3.7644	0.00783595	0.410538	-2.21021
11199	42	3	15	YDL061C	RPS29b	-0.33884	10.1926	-3.76418	0.00783806	0.410538	-2.21048
6455	24	13	7	YMR299C	DYN3	0.383889	8.56717	3.76127	0.00786685	0.410538	-2.21411
11457	43	3	1	YDR057W	YOS9	0.329951	7.93731	3.7578	0.00790124	0.410538	-2.21844
7422	28	5	14	YEL063C	CAN1	0.345657	8.94917	3.75641	0.00791503	0.410538	-2.22017
10455	39	8	7	YIR041W	PAU15	-0.388797	7.86781	-3.75496	0.00792945	0.410538	-2.22198
5876	22	11	4	YLR158C	ASP3-3	0.389578	11.1481	3.74611	0.00801835	0.410635	-2.23304
6349	24	6	13	YGL123W	RPS2	-0.677724	12.4311	-3.7433	0.00804673	0.410635	-2.23655
12596	47	6	4	YGR034W	RPL26b	-0.407265	11.263	-3.7431	0.00804878	0.410635	-2.2368
6700	25	11	12	YLR258W	GSY2	0.520406	8.32592	3.73862	0.00809434	0.410635	-2.2424
6028	23	3	12	YDR077W	SED1	0.326873	11.9779	3.73789	0.00810179	0.410635	-2.24332
6416	24	10	16	YKL165C	MCD4	-0.331587	9.14913	-3.7361	0.00812016	0.410635	-2.24557
5254	20	6	6	YGL031C	RPL24a	-0.3268	11.4974	-3.73179	0.00816438	0.41086	-2.25096
11251	42	7	3	YGR131W	FHN1	-0.424534	9.33611	-3.72852	0.0081982	0.41086	-2.25506
12179	45	14	3	YOL158C	ENB1	-0.381027	8.91236	-3.7265	0.0082191	0.41086	-2.25759
9161	34	12	9	YML034W	SRC1	0.36136	7.60283	3.71271	0.00836363	0.41213	-2.27489
2485	10	3	5	YDL081C	RPP1a	-0.334708	11.8038	-3.71238	0.00836704	0.41213	-2.2753
11206	42	4	6	YDR247W	VHS1	0.323553	6.80685	3.71028	0.00838929	0.41213	-2.27793
2526	10	5	14	YEL049W	PAU2	-0.453134	8.15897	-3.70576	0.00843749	0.41213	-2.28362
8060	30	11	12	YLR162W	YLR162W	-0.346213	9.57753	-3.70537	0.00844166	0.41213	-2.28411
9806	37	1	14	YBR139W	YBR139W	0.368483	8.22547	3.70165	0.00848142	0.41213	-2.28877
7052	26	16	12	YPL057C	SUR1	0.362353	7.88854	3.70019	0.00849721	0.41213	-2.29062
3899	15	6	11	YGL261C	PAU11	-0.359925	8.26335	-3.69634	0.00853872	0.41261	-2.29546
2888	11	11	8	YLR243W	GPN3	0.324645	8.46724	3.69249	0.0085805	0.412922	-2.30031
10980	41	7	4	YHL027W	RIM101	0.321493	8.73808	3.6829	0.0086855	0.412922	-2.31238
10253	38	12	13	YML122C	YML122C	-0.49972	6.49409	-3.68013	0.00871609	0.412922	-2.31587
10792	40	12	8	YML081W	TDA9	0.343122	8.85606	3.67775	0.00874251	0.412922	-2.31888
8438	32	1	6	YBL060W	YEL1	0.525298	8.16408	3.67706	0.00875018	0.412922	-2.31975
6736	25	13	16	YNL072W	RNH201	0.342448	10.8884	3.67608	0.00876102	0.412922	-2.32098
8522	32	6	10	YGL133W	ITC1	-0.325562	8.36597	-3.67436	0.00878021	0.412922	-2.32315
7051	26	16	11	YPL057C	SUR1	0.333512	8.04289	3.67189	0.00880778	0.412922	-2.32627
11179	42	2	11	YBR196C	PGI1	0.320742	11.6684	3.66961	0.00883331	0.412922	-2.32914
5003	19	7	11	YGR294W	PAU12	-0.350757	7.93228	-3.66709	0.00886168	0.412922	-2.33233
9859	37	5	3	YFL035C-B	YFL035C-B	-0.327937	9.35304	-3.65879	0.00895573	0.414637	-2.34281
11200	42	3	16	YDL061C	RPS29b	-0.326692	10.2815	-3.65824	0.00896204	0.414637	-2.34351
12711	47	13	7	YNL187W	SWT21	0.359852	8.51827	3.65244	0.00902849	0.41492	-2.35085
9496	35	16	8	YPL258C	THI21	0.31871	6.94251	3.65192	0.00903447	0.41492	-2.35151
4865	18	16	1	YPL101W	ELP4	0.324111	8.72884	3.6494	0.00906356	0.41492	-2.3547
13040	48	16	16	YPL166W	ATG29	0.351865	7.22449	3.64174	0.0091525	0.417033	-2.3644
12300	46	4	12	YDR293C	SSD1	-0.331093	9.31834	-3.63993	0.00917363	0.417033	-2.36669
1163	5	5	11	YFL004W	VTC2	0.326661	8.56204	3.63113	0.00927727	0.41964	-2.37785
6027	23	3	11	YDR077W	SED1	0.321194	12.6581	3.62801	0.00931428	0.41964	-2.3818
8132	30	16	4	YPL157W	TGS1	0.316269	8.69396	3.6269	0.00932748	0.41964	-2.38321
9144	34	11	8	YLR076C	YLR076C	-0.319166	11.5541	-3.62171	0.00938955	0.420389	-2.3898
4319	16	15	15	YOR145C	PNO1	0.319835	10.4555	3.62013	0.00940857	0.420389	-2.39181
3900	15	6	12	YGL261C	PAU11	-0.348213	8.095	-3.60326	0.0096139	0.422621	-2.41326
10254	38	12	14	YML122C	YML122C	-0.425528	6.39274	-3.60238	0.00962471	0.422621	-2.41437
11170	42	2	2	YBR248C	HIS7	0.375752	9.00162	3.60097	0.00964217	0.422621	-2.41618
12493	46	16	13	YPL215W	CBP3	0.325751	8.77283	3.59969	0.00965793	0.422621	-2.4178
1711	7	5	15	YFL001W	DEG1	0.318066	7.99979	3.59828	0.00967551	0.422621	-2.41961
11674	43	16	10	YPR029C	APL4	0.323361	7.84752	3.59688	0.00969279	0.422621	-2.42138
9578	36	4	10	YDR236C	FMN1	-0.400226	8.61813	-3.59666	0.00969552	0.422621	-2.42166
5845	22	9	5	YJL223C	PAU1	-0.378556	8.37036	-3.59351	0.00973488	0.422621	-2.42568
9728	36	13	16	YMR217W	GUA1	0.592093	10.8167	3.59213	0.00975201	0.422621	-2.42743
8574	32	9	14	YJR002W	MPP10	0.325404	8.57258	3.58812	0.00980233	0.422621	-2.43254
10447	39	7	15	YHR055C	CUP1-2	-0.372473	10.1115	-3.58713	0.00981484	0.422621	-2.43381
1925	8	2	5	YBR301W	PAU24	-0.316938	8.54688	-3.58376	0.00985736	0.423056	-2.43811
9537	36	2	1	YBR239C	ERT1	-0.352587	8.3399	-3.57968	0.00990918	0.423886	-2.44332
2337	9	11	1	YLR293C	GSP1	-0.312229	11.2042	-3.57472	0.00997257	0.425203	-2.44965
12074	45	7	10	YHR113W	APE4	0.375936	8.34529	3.56952	0.0100395	0.426661	-2.4563
3762	14	15	2	YOR200W	YOR200W	-0.355509	7.50425	-3.55973	0.0101667	0.428192	-2.46881
10688	40	5	16	YER038C	KRE29	0.309997	7.68614	3.55404	0.0102416	0.428192	-2.47611
11438	43	1	14	YBR052C	RFS1	-0.415688	11.2242	-3.55112	0.0102802	0.428192	-2.47985
11894	44	13	6	YMR277W	FCP1	0.364985	8.56233	3.54884	0.0103105	0.428192	-2.48277
9249	35	1	1	YBR050C	REG2	0.328738	6.56017	3.54872	0.0103121	0.428192	-2.48292
4522	17	11	10	YLR297W	YLR297W	0.310276	7.60297	3.54784	0.0103238	0.428192	-2.48405
9406	35	10	14	YKR100C	SKG1	0.313274	7.33524	3.54666	0.0103394	0.428192	-2.48555
5329	20	11	1	YLR109W	AHP1	0.368959	12.2236	3.54435	0.0103703	0.428192	-2.48852
4952	19	4	8	YDR366C	YDR366C	-0.413937	9.2581	-3.54431	0.0103709	0.428192	-2.48857
8370	31	14	2	YOR023C	AHC1	0.312629	8.08209	3.52791	0.0105928	0.435976	-2.50962
11378	42	15	2	YOR136W	IDH2	0.312218	7.39434	3.52056	0.0106939	0.438754	-2.51906
12102	45	9	6	YKL051W	SFK1	0.373035	7.76288	3.51223	0.0108098	0.439461	-2.52978
11832	44	9	8	YJL102W	MEF2	0.342734	7.43279	3.51185	0.0108152	0.439461	-2.53027
11989	45	2	5	YDL017W	CDC7	-0.309551	7.54318	-3.50853	0.0108618	0.439461	-2.53454
9561	36	3	9	YDL102W	POL3	-0.332815	8.0756	-3.50728	0.0108794	0.439461	-2.53616
10248	38	12	8	YML082W	YML082W	0.30985	8.05791	3.50727	0.0108796	0.439461	-2.53617
2471	10	2	7	YBR166C	TYR1	-0.393746	8.56312	-3.50137	0.010963	0.441464	-2.54376
12263	46	2	7	YBR294W	SUL1	0.324477	7.65346	3.49282	0.0110852	0.445013	-2.55479
38	1	3	6	YDR016C	DAD1	-0.307536	8.47819	-3.48554	0.0111905	0.44786	-2.56418
6920	26	8	8	YHR145C	YHR145C	-0.382112	9.51797	-3.4817	0.0112466	0.448729	-2.56915
10791	40	12	7	YML081W	TDA9	0.325569	8.946	3.47503	0.0113445	0.449821	-2.57777
8270	31	7	14	YHR094C	HXT1	0.479354	9.41491	3.46796	0.0114493	0.449821	-2.58691
9340	35	6	12	YGL189C	RPS26a	-0.311632	10.957	-3.46663	0.0114692	0.449821	-2.58863
12045	45	5	13	YFR015C	GSY1	0.368403	7.69278	3.4663	0.0114741	0.449821	-2.58906
5966	22	16	14	YPL191C	YPL191C	0.306019	7.40501	3.46508	0.0114922	0.449821	-2.59063
3179	12	12	11	YLR432W	IMD3	-0.308384	10.0235	-3.46152	0.0115457	0.449821	-2.59524
10349	39	1	13	YBR138C	YBR138C	-0.604347	8.73722	-3.45749	0.0116065	0.449821	-2.60047
9155	34	12	3	YLR461W	PAU4	-0.367957	8.64741	-3.45677	0.0116173	0.449821	-2.60139
219	1	14	11	YOL018C	TLG2	0.315956	8.4038	3.45492	0.0116454	0.449821	-2.60379
7109	27	3	5	YDR039C	ENA2	-0.316644	8.83665	-3.45485	0.0116465	0.449821	-2.60388
10835	40	15	3	YOR175C	ALE1	0.304667	9.21096	3.45394	0.0116603	0.449821	-2.60506
6970	26	11	10	YLR114C	AVL9	0.309036	8.32293	3.4508	0.011708	0.449821	-2.60913
6494	24	15	14	YOR201C	MRM1	-0.441919	8.52544	-3.44988	0.0117222	0.449821	-2.61033
4296	16	14	8	YNR008W	LRO1	0.303425	8.30323	3.44293	0.011829	0.452589	-2.61934
11767	44	5	7	YEL036C	ANP1	0.299721	9.80065	3.43565	0.0119418	0.45557	-2.62878
6699	25	11	11	YLR258W	GSY2	0.522105	8.63172	3.43023	0.0120268	0.457473	-2.63583
12894	48	7	14	YGR268C	HUA1	-0.305749	7.17592	-3.4244	0.0121188	0.457949	-2.64341
11546	43	8	10	YIL176C	PAU14	-0.371311	8.34957	-3.42296	0.0121417	0.457949	-2.64528
11537	43	8	1	YIR003W	AIM21	0.302256	7.69807	3.42152	0.0121645	0.457949	-2.64715
9567	36	3	15	YDL052C	SLC1	-0.358315	8.98165	-3.42057	0.0121797	0.457949	-2.64839
2060	8	10	12	YKL151C	YKL151C	0.430307	9.14258	3.41591	0.0122542	0.458332	-2.65445
8520	32	6	8	YGL087C	MMS2	-0.325545	7.39423	-3.41554	0.0122601	0.458332	-2.65493
3180	12	12	12	YLR432W	IMD3	-0.312264	9.98639	-3.41032	0.0123442	0.459205	-2.66173
6419	24	11	3	YLR157C	ASP3-2	0.304397	11.2612	3.40972	0.0123539	0.459205	-2.66251
4528	17	11	16	YLR248W	RCK2	0.315084	9.93635	3.4026	0.0124697	0.462192	-2.67178
4777	18	10	9	YKL120W	OAC1	-0.333256	8.52539	-3.39457	0.0126017	0.465048	-2.68225
161	1	11	1	YLR286C	CTS1	0.325633	11.7031	3.39359	0.012618	0.465048	-2.68354
11223	42	5	7	YEL037C	RAD23	0.316636	8.46732	3.38915	0.0126917	0.465931	-2.68933
1164	5	5	12	YFL004W	VTC2	0.299951	8.68155	3.38785	0.0127134	0.465931	-2.69103
3303	13	3	7	YDR072C	IPT1	-0.332193	9.38852	-3.38438	0.0127714	0.466745	-2.69555
11431	43	1	7	YBR010W	HHT1	-0.347908	11.0823	-3.3821	0.0128098	0.466843	-2.69854
7534	28	12	14	YML024W	RPS17a	0.641915	12.6428	3.3768	0.0128993	0.468795	-2.70546
37	1	3	5	YDR016C	DAD1	-0.297772	8.40654	-3.37081	0.0130014	0.471192	-2.7133
9414	35	11	6	YLR314C	CDC3	0.427534	8.81168	3.36601	0.0130838	0.471342	-2.71958
4772	18	10	4	YKL077W	YKL077W	0.314383	9.83054	3.36105	0.0131695	0.471342	-2.72607
2388	9	14	4	YOL030W	GAS5	0.295645	9.31281	3.36099	0.0131706	0.471342	-2.72615
888	4	5	8	YDR542W	PAU10	-0.374836	8.635	-3.36005	0.0131867	0.471342	-2.72737
11940	44	16	4	YPL076W	GPI2	0.298323	7.49429	3.35981	0.0131911	0.471342	-2.7277
3058	12	5	2	YEL054C	RPL12a	-0.294292	12.0575	-3.35801	0.0132223	0.471342	-2.73005
4623	17	17	15	YPR204W	YPR204W	0.292746	11.2283	3.35328	0.0133049	0.472996	-2.73624
3790	14	16	14	YPL183C	RTT10	0.291991	8.1594	3.34457	0.0134587	0.474622	-2.74766
8495	32	4	15	YDR274C	YDR274C	-0.293092	7.98169	-3.34352	0.0134774	0.474622	-2.74904
4748	18	8	12	YHR137W	ARO9	0.304658	8.67113	3.3429	0.0134884	0.474622	-2.74985
5183	20	1	15	YAL018C	YAL018C	-0.292214	6.2338	-3.33915	0.0135553	0.474622	-2.75477
2774	11	4	6	YDR406W	PDR15	-0.417857	8.22346	-3.33857	0.0135658	0.474622	-2.75554
9538	36	2	2	YBR239C	ERT1	-0.318117	8.23372	-3.33433	0.013642	0.474622	-2.76111
10590	39	16	14	YPR115W	RGC1	0.332145	8.91483	3.3291	0.0137365	0.474622	-2.76797
12485	46	16	5	YPL219W	PCL8	0.358205	9.53336	3.32892	0.0137398	0.474622	-2.76821
1359	5	17	15	YPR156C	TPO3	0.345451	8.01691	3.32671	0.0137799	0.474622	-2.77111
12595	47	6	3	YGR034W	RPL26b	-0.316881	11.3932	-3.32352	0.0138382	0.474622	-2.77531
4714	18	6	10	YGL030W	RPL30	-0.310247	11.2096	-3.32314	0.0138452	0.474622	-2.77581
3143	12	10	7	YKL066W	YKL066W	0.44433	9.97799	3.32223	0.0138618	0.474622	-2.77701
5965	22	16	13	YPL191C	YPL191C	0.289916	7.47841	3.31874	0.0139259	0.474622	-2.78159
7423	28	5	15	YEL017C-A	PMP2	0.315585	8.5069	3.31685	0.0139609	0.474622	-2.78408
10450	39	8	2	YJL048C	UBX6	0.349078	8.99971	3.3136	0.0140211	0.474622	-2.78836
4957	19	4	13	YDR410C	STE14	-0.288909	9.1467	-3.31315	0.0140294	0.474622	-2.78895
2040	8	9	8	YJL158C	CIS3	0.524884	12.1591	3.31202	0.0140505	0.474622	-2.79044
2882	11	11	2	YLR292C	SEC72	0.289085	9.49816	3.31111	0.0140673	0.474622	-2.79164
12742	47	15	6	YPL026C	SKS1	0.288871	7.72227	3.30944	0.0140985	0.474622	-2.79383
12792	48	1	8	YBL028C	YBL028C	-0.295581	8.76249	-3.30625	0.0141582	0.474622	-2.79804
8042	30	10	10	YKL224C	PAU16	-0.362943	8.32327	-3.30446	0.0141919	0.474622	-2.8004
10719	40	7	15	YGR212W	SLI1	-0.296483	8.23595	-3.30217	0.014235	0.474622	-2.80341
8540	32	7	12	YGR206W	MVB12	-0.294364	7.88022	-3.30084	0.0142602	0.474622	-2.80517
12841	48	4	9	YDR340W	YDR340W	-0.342236	9.25497	-3.29915	0.0142921	0.474622	-2.80739
2525	10	5	13	YEL049W	PAU2	-0.391282	8.27789	-3.29585	0.0143547	0.474622	-2.81174
10578	39	16	2	YPR121W	THI22	0.32157	9.10098	3.29488	0.0143733	0.474622	-2.81302
4270	16	12	14	YML100W	TSL1	0.913676	8.26523	3.29084	0.0144506	0.474622	-2.81835
11230	42	5	14	YER001W	MNN1	0.291105	8.35032	3.28942	0.0144778	0.474622	-2.82022
10880	40	17	16	YPR183W	DPM1	-0.324394	10.1302	-3.28718	0.0145209	0.474622	-2.82318
12469	46	15	5	YOR230W	WTM1	0.467731	10.8118	3.28579	0.0145478	0.474622	-2.82502
6266	24	1	10	YBL050W	SEC17	-0.441523	9.18935	-3.28423	0.0145779	0.474622	-2.82707
11132	41	16	12	YPL265W	DIP5	0.362858	8.75865	3.2842	0.0145784	0.474622	-2.82711
11833	44	9	9	YJL148W	RPA34	0.384013	10.0386	3.28269	0.0146077	0.474622	-2.82911
4321	16	16	1	YPL188W	POS5	0.382408	7.71894	3.28204	0.0146203	0.474622	-2.82996
8369	31	14	1	YOR023C	AHC1	0.286963	8.22115	3.2803	0.0146542	0.474622	-2.83227
7580	28	15	12	YOR067C	ALG8	0.324606	9.43145	3.27781	0.0147029	0.474622	-2.83556
7191	27	8	7	YIL114C	POR2	-0.29373	8.21948	-3.27584	0.0147412	0.474622	-2.83815
9848	37	4	8	YDR479C	PEX29	0.289325	8.00595	3.27441	0.0147693	0.474622	-2.84004
7472	28	8	16	YHR141C	RPL42b	-0.717949	11.7063	-3.27192	0.0148184	0.474622	-2.84334
6569	25	3	9	YDR038C	ENA5	-0.53227	9.14263	-3.26978	0.0148605	0.474622	-2.84616
7549	28	13	13	YMR257C	PET111	-0.426604	7.73075	-3.26922	0.0148716	0.474622	-2.8469
6424	24	11	8	YLR155C	ASP3-1	0.322249	11.0053	3.26887	0.0148785	0.474622	-2.84736
12216	45	16	8	YPR080W	TEF1	0.310469	14.3972	3.26372	0.0149808	0.475623	-2.85417
8843	33	9	11	YJR060W	CBF1	0.35658	8.08709	3.26362	0.0149828	0.475623	-2.85431
8549	32	8	5	YIL066C	RNR3	0.500698	8.20995	3.26012	0.0150529	0.475647	-2.85894
4624	17	17	16	YPR204W	YPR204W	0.284353	11.1638	3.25831	0.0150892	0.475647	-2.86134
4297	16	14	9	YNR054C	ESF2	0.296492	8.06707	3.25812	0.015093	0.475647	-2.86158
305	2	3	1	YDL075W	RPL31a	-0.291883	11.6828	-3.25318	0.0151927	0.476398	-2.86813
4713	18	6	9	YGL030W	RPL30	-0.319006	11.1008	-3.25278	0.0152008	0.476398	-2.86866
9954	37	11	2	YLR413W	YLR413W	0.348445	10.3517	3.25152	0.0152263	0.476398	-2.87033
8269	31	7	13	YHR094C	HXT1	0.393174	9.40385	3.24638	0.015331	0.477182	-2.87714
9122	34	10	2	YKL140W	TGL1	0.294247	8.14686	3.24198	0.0154213	0.477182	-2.88297
11941	44	16	5	YPL122C	TFB2	0.463481	7.89971	3.23521	0.0155612	0.477182	-2.89195
9594	36	5	10	YEL073C	YEL073C	-0.285419	7.9409	-3.23205	0.0156271	0.477182	-2.89615
12521	47	1	9	YBR148W	YSW1	0.33784	9.1229	3.23185	0.0156312	0.477182	-2.8964
2338	9	11	2	YLR293C	GSP1	-0.287686	11.1631	-3.23084	0.0156524	0.477182	-2.89775
2881	11	11	1	YLR292C	SEC72	0.286708	9.62998	3.23071	0.0156551	0.477182	-2.89793
1092	5	1	4	YBR067C	TIP1	-0.34745	8.80327	-3.22813	0.0157091	0.477182	-2.90135
12795	48	1	11	YBL026W	LSM2	-0.284125	9.30013	-3.22702	0.0157325	0.477182	-2.90282
1976	8	5	8	YER011W	TIR1	-0.410728	11.7632	-3.22423	0.0157912	0.477182	-2.90652
7430	28	6	6	YGL039W	YGL039W	-0.281444	9.05564	-3.22104	0.0158586	0.477182	-2.91076
6499	24	16	3	YPL148C	PPT2	0.280872	7.72038	3.22065	0.0158669	0.477182	-2.91128
9357	35	7	13	YHR009C	TDA3	0.310508	8.79725	3.22027	0.0158751	0.477182	-2.91179
9575	36	4	7	YDR190C	RVB1	0.305896	9.68974	3.21996	0.0158817	0.477182	-2.9122
1926	8	2	6	YBR301W	PAU24	-0.28609	8.62302	-3.21899	0.0159021	0.477182	-2.91348
5184	20	1	16	YAL018C	YAL018C	-0.324516	6.2306	-3.2179	0.0159253	0.477182	-2.91493
5373	20	13	13	YMR250W	GAD1	0.609781	8.38173	3.21528	0.0159813	0.477182	-2.91841
3241	12	16	9	YPL088W	YPL088W	0.310251	8.36793	3.21521	0.0159829	0.477182	-2.91851
2016	8	7	16	YGR180C	RNR4	0.282629	11.2684	3.21165	0.0160592	0.478005	-2.92325
774	3	15	6	YOR285W	RDL1	0.454559	10.4448	3.21051	0.0160837	0.478005	-2.92476
10474	39	9	10	YKL040C	NFU1	0.299724	8.77779	3.20551	0.0161918	0.478359	-2.93142
12437	46	13	5	YNL043C	YNL043C	-0.283847	9.78656	-3.20334	0.0162388	0.478359	-2.9343
12958	48	11	14	YLR223C	IFH1	0.288813	8.66653	3.2031	0.0162442	0.478359	-2.93463
3673	14	9	9	YJL213W	YJL213W	-0.282049	8.88907	-3.20122	0.0162851	0.478359	-2.93713
8	1	1	8	YBL085W	BOI1	-0.281203	7.01279	-3.19994	0.016313	0.478359	-2.93883
7471	28	8	15	YHR141C	RPL42b	-0.685728	11.673	-3.19898	0.0163339	0.478359	-2.9401
6286	24	2	14	YCL011C	GBP2	-0.306813	9.84239	-3.197	0.0163775	0.478359	-2.94275
9562	36	3	10	YDL102W	POL3	-0.316604	7.94199	-3.19303	0.0164649	0.478359	-2.94804
6223	23	15	15	YOR344C	TYE7	0.283648	8.75173	3.1928	0.0164698	0.478359	-2.94833
7079	27	1	7	YBL106C	SRO77	-0.286428	7.10417	-3.19061	0.0165183	0.478359	-2.95125
12	1	1	12	YBL083C	YBL083C	-0.277915	7.91489	-3.18708	0.0165968	0.478359	-2.95597
9320	35	5	8	YER131W	RPS26b	-0.296351	11.0786	-3.18443	0.0166559	0.478359	-2.9595
9542	36	2	6	YBR237W	PRP5	-0.365429	8.94282	-3.1841	0.0166634	0.478359	-2.95994
7082	27	1	10	YBR038W	CHS2	-0.295584	7.04467	-3.18387	0.0166683	0.478359	-2.96023
5370	20	13	10	YMR251W-A	HOR7	0.576303	11.0317	3.1838	0.01667	0.478359	-2.96034
5403	20	15	11	YOR059C	YOR059C	0.299454	9.06951	3.18223	0.0167051	0.478359	-2.96242
2263	9	6	7	YGL168W	HUR1	-0.457474	9.01739	-3.17914	0.0167747	0.478359	-2.96655
5101	19	13	13	YNL111C	CYB5	0.281045	10.3857	3.17864	0.0167858	0.478359	-2.96721
12945	48	11	1	YLR229C	CDC42	-0.331909	9.72293	-3.17836	0.0167922	0.478359	-2.96759
7389	28	3	13	YDL092W	SRP14	-0.293464	8.4241	-3.17141	0.0169496	0.480765	-2.97686
3278	13	1	14	YBR115C	LYS2	-0.289406	7.07016	-3.16799	0.0170279	0.480765	-2.98144
9568	36	3	16	YDL052C	SLC1	-0.347644	8.88738	-3.16791	0.0170297	0.480765	-2.98154
10780	40	11	12	YLR169W	YLR169W	-0.325432	7.5154	-3.16788	0.0170304	0.480765	-2.98158
10798	40	12	14	YML121W	GTR1	0.33661	8.39552	3.16655	0.0170609	0.480765	-2.98336
9852	37	4	12	YDR477W	SNF1	0.308971	7.56117	3.16354	0.0171301	0.481469	-2.98738
12370	46	9	2	YJR024C	MDE1	-0.276148	9.28577	-3.1595	0.0172235	0.481469	-2.99278
11398	42	16	6	YPL123C	RNY1	0.31288	7.65065	3.15932	0.0172276	0.481469	-2.99301
3186	12	13	2	YMR246W	FAA4	0.395563	10.6458	3.15906	0.0172335	0.481469	-2.99336
10364	39	2	12	YCR087W	YCR087W	-0.357951	8.30491	-3.1571	0.0172792	0.481714	-2.99599
9672	36	10	8	YKL090W	CUE2	0.296624	7.78851	3.15338	0.017366	0.483101	-3.00096
9860	37	5	4	YFL035C-B	YFL035C-B	-0.301057	9.50107	-3.14888	0.0174714	0.484998	-3.00697
8679	32	16	7	YPL154C	PEP4	0.42518	10.6785	3.14695	0.0175169	0.485063	-3.00955
8259	31	7	3	YHR053C	CUP1-1	-0.291901	9.48652	-3.14563	0.0175481	0.485063	-3.01132
11928	44	15	8	YOR085W	OST3	0.322935	10.2351	3.14391	0.0175889	0.485063	-3.01363
5676	21	15	12	YOR347C	PYK2	0.309468	7.92333	3.1425	0.0176224	0.485063	-3.01552
251	1	16	11	YPL225W	YPL225W	0.343209	9.88125	3.13366	0.0178337	0.489109	-3.02735
12618	47	7	10	YHR112C	YHR112C	0.279896	7.99089	3.13303	0.0178489	0.489109	-3.0282
2050	8	10	2	YKL203C	TOR2	0.285171	8.6721	3.13019	0.0179174	0.489109	-3.03201
1744	7	7	16	YHR025W	THR1	-0.273098	9.34756	-3.1275	0.0179827	0.489109	-3.03561
8260	31	7	4	YHR053C	CUP1-1	-0.294015	9.54508	-3.12574	0.0180253	0.489109	-3.03797
6464	24	13	16	YMR295C	YMR295C	0.395446	9.49357	3.12373	0.0180742	0.489109	-3.04066
6948	26	10	4	YKL085W	MDH1	0.344214	7.56523	3.11977	0.0181713	0.489109	-3.04597
2777	11	4	9	YDR404C	RPB7	-0.306439	8.6965	-3.11913	0.018187	0.489109	-3.04683
11172	42	2	4	YBR200W	BEM1	0.499893	9.84732	3.11731	0.0182317	0.489109	-3.04927
6423	24	11	7	YLR155C	ASP3-1	0.27934	10.7095	3.11518	0.0182843	0.489109	-3.05213
12796	48	1	12	YBL026W	LSM2	-0.299103	9.34825	-3.11445	0.0183025	0.489109	-3.05312
9915	37	8	11	YIR040C	YIR040C	-0.409829	6.49477	-3.11418	0.0183091	0.489109	-3.05348
12946	48	11	2	YLR229C	CDC42	-0.278491	9.73959	-3.11308	0.0183363	0.489109	-3.05495
11798	44	7	6	YGR176W	YGR176W	-0.401075	8.51696	-3.11272	0.0183453	0.489109	-3.05544
10473	39	9	9	YKL040C	NFU1	0.278849	8.74748	3.11046	0.0184014	0.489109	-3.05847
719	3	11	15	YLR231C	BNA5	0.274096	8.90997	3.11043	0.0184021	0.489109	-3.05851
3169	12	12	1	YML014W	TRM9	0.352557	8.22541	3.11025	0.0184067	0.489109	-3.05875
11807	44	7	15	YGR124W	ASN2	-0.334055	10.8979	-3.10772	0.0184698	0.489788	-3.06215
1912	8	1	8	YAR061W	YAR061W	0.272067	6.16416	3.10479	0.0185432	0.489895	-3.06609
2994	12	1	2	YAL063C	FLO9	-0.306258	8.55408	-3.10399	0.0185631	0.489895	-3.06715
4207	16	8	15	YHR218W	YHR218W	0.320557	7.48643	3.10306	0.0185865	0.489895	-3.0684
11432	43	1	8	YBR010W	HHT1	-0.330688	10.9855	-3.09781	0.0187191	0.490195	-3.07546
11343	42	12	15	YLR463C	YLR463C	-0.280472	8.2875	-3.09761	0.0187241	0.490195	-3.07573
9675	36	10	11	YKL088W	CAB3	0.317963	8.42993	3.09609	0.0187628	0.490195	-3.07777
10310	38	16	6	YPL211W	NIP7	0.278239	8.75096	3.09573	0.018772	0.490195	-3.07826
7011	26	14	3	YNL270C	ALP1	0.275657	7.47625	3.09519	0.0187857	0.490195	-3.07899
12920	48	9	8	YJL198W	PHO90	-0.279888	8.21949	-3.09239	0.0188571	0.491074	-3.08275
12005	45	3	5	YDR152W	GIR2	-0.274968	8.94227	-3.09079	0.0188979	0.491158	-3.0849
6923	26	8	11	YHR143W-A	RPC10	-0.27863	8.05186	-3.08324	0.0190925	0.493868	-3.09506
3277	13	1	13	YBR115C	LYS2	-0.292963	7.0046	-3.08309	0.0190963	0.493868	-3.09526
10257	38	13	1	YNL037C	IDH1	0.275621	8.26237	3.08234	0.0191158	0.493868	-3.09627
9701	36	12	5	YML035C	AMD1	0.270424	8.58486	3.07861	0.0192126	0.495389	-3.10129
6328	24	5	8	YER026C	CHO1	-0.281824	10.5239	-3.07714	0.0192511	0.495402	-3.10327
10697	40	6	9	YGL141W	HUL5	-0.273351	6.3259	-3.07337	0.0193498	0.496152	-3.10835
12696	47	12	8	YMR138W	CIN4	0.288204	8.28062	3.07312	0.0193563	0.496152	-3.10868
4102	16	2	6	YCL007C	CWH36	-0.288792	7.62736	-3.06979	0.0194442	0.497046	-3.11318
6750	25	14	14	YOL088C	MPD2	0.310708	8.38282	3.06868	0.0194735	0.497046	-3.11467
6500	24	16	4	YPL148C	PPT2	0.267638	7.63984	3.06661	0.0195281	0.497046	-3.11745
557	3	1	13	YBR012W-B	YBR012W-B	-0.303766	7.53311	-3.06548	0.0195583	0.497046	-3.11898
7497	28	10	9	YKL127W	PGM1	0.328569	9.56857	3.0646	0.0195817	0.497046	-3.12017
11458	43	3	2	YDR057W	YOS9	0.274915	7.35934	3.06049	0.0196913	0.497761	-3.1257
9769	36	16	9	YPL112C	PEX25	0.310554	8.90504	3.06045	0.0196924	0.497761	-3.12576
5198	20	2	14	YBR217W	ATG12	-0.322322	7.77244	-3.05926	0.0197243	0.497761	-3.12737
914	4	7	2	YGR138C	TPO2	0.374287	8.63065	3.05641	0.0198008	0.498147	-3.13121
887	4	5	7	YDR542W	PAU10	-0.330664	8.63244	-3.0539	0.0198684	0.498147	-3.13459
12298	46	4	10	YDR341C	YDR341C	-0.316652	9.56646	-3.05182	0.0199249	0.498147	-3.1374
2074	8	11	10	YLR185W	RPL37a	-0.28744	11.4837	-3.04977	0.0199804	0.498147	-3.14017
3296	13	2	16	YCR061W	YCR061W	0.279856	7.24078	3.04973	0.0199815	0.498147	-3.14022
13	1	1	13	YBR013C	YBR013C	-0.268588	8.31694	-3.04892	0.0200035	0.498147	-3.14131
7819	29	13	11	YNL170W	YNL170W	-0.338469	8.09322	-3.04811	0.0200255	0.498147	-3.1424
9113	34	9	9	YJL141C	YAK1	0.307974	8.3747	3.04616	0.020079	0.498147	-3.14505
5675	21	15	11	YOR347C	PYK2	0.272531	7.99592	3.046	0.0200832	0.498147	-3.14526
10532	39	13	4	YNL181W	YNL181W	0.270257	7.34627	3.04309	0.020163	0.498645	-3.14919
11316	42	11	4	YLR086W	SMC4	-0.26552	9.05191	-3.04248	0.0201797	0.498645	-3.15001
8521	32	6	9	YGL133W	ITC1	-0.291976	8.40181	-3.03769	0.0203118	0.50096	-3.15648
5197	20	2	13	YBR217W	ATG12	-0.371842	7.71317	-3.03526	0.0203791	0.501673	-3.15977
10797	40	12	13	YML121W	GTR1	0.351531	8.34452	3.03108	0.0204955	0.503556	-3.16541
4306	16	15	2	YOR199W	YOR199W	-0.310347	6.76786	-3.02897	0.0205544	0.503556	-3.16826
8844	33	9	12	YJR060W	CBF1	0.350853	7.67715	3.02621	0.020632	0.503556	-3.172
1434	6	5	10	YER056C	FCY2	0.341033	9.70433	3.02317	0.0207178	0.503556	-3.17611
6437	24	12	5	YML110C	COQ5	0.27419	9.06138	3.02131	0.0207703	0.503556	-3.17862
7750	29	9	6	YKL035W	UGP1	0.276304	9.05562	3.0205	0.0207934	0.503556	-3.17973
4958	19	4	14	YDR410C	STE14	-0.263287	8.97135	-3.01854	0.0208489	0.503556	-3.18237
1913	8	1	9	YBL034C	STU1	0.271293	6.85182	3.0182	0.0208588	0.503556	-3.18284
13039	48	16	15	YPL166W	ATG29	0.266553	7.18144	3.01537	0.0209394	0.503556	-3.18666
12100	45	9	4	YKL006C-A	SFT1	-0.263137	11.9847	-3.01528	0.0209421	0.503556	-3.18679
685	3	9	13	YJR073C	OPI3	-0.275184	11.6812	-3.01298	0.0210078	0.503556	-3.1899
6735	25	13	15	YNL072W	RNH201	0.285096	10.8603	3.01008	0.0210913	0.503556	-3.19383
9067	34	6	11	YFR055W	IRC7	-0.277681	7.83138	-3.00917	0.0211176	0.503556	-3.19506
5004	19	7	12	YGR294W	PAU12	-0.291176	7.98903	-3.00832	0.021142	0.503556	-3.19621
6297	24	3	9	YDL181W	INH1	0.613957	7.80253	3.00826	0.0211436	0.503556	-3.19629
11236	42	6	4	YGL010W	YGL010W	-0.365411	7.7116	-3.00741	0.0211682	0.503556	-3.19744
8950	33	16	6	YPR024W	YME1	0.26224	7.63624	3.00732	0.021171	0.503556	-3.19757
4269	16	12	13	YML100W	TSL1	0.844029	8.28549	3.00332	0.021287	0.503556	-3.20298
11805	44	7	13	YGR172C	YIP1	-0.26716	9.07651	-2.9996	0.0213954	0.503556	-3.20802
13026	48	16	2	YPL220W	RPL1a	0.582215	12.3263	2.99928	0.021405	0.503556	-3.20846
11177	42	2	9	YBR244W	GPX2	-0.262061	8.43964	-2.99819	0.0214367	0.503556	-3.20993
12791	48	1	7	YBL028C	YBL028C	-0.264356	8.8363	-2.99708	0.0214693	0.503556	-3.21144
4097	16	2	1	YCL009C	ILV6	-0.3051	8.51729	-2.99707	0.0214695	0.503556	-3.21145
6302	24	3	14	YDL179W	PCL9	-0.268547	7.78487	-2.99575	0.0215084	0.503556	-3.21324
7080	27	1	8	YBL106C	SRO77	-0.285214	7.00481	-2.99559	0.021513	0.503556	-3.21345
10516	39	12	4	YMR133W	REC114	0.261058	6.66427	2.99376	0.0215671	0.503556	-3.21594
2172	8	17	12	YPR149W	NCE102	0.488779	10.1328	2.99247	0.0216052	0.503556	-3.21769
1052	4	15	12	YOR043W	WHI2	0.274132	9.68675	2.9889	0.0217108	0.503556	-3.22252
690	3	10	2	YKR074W	AIM29	-0.2779	8.65248	-2.9889	0.0217108	0.503556	-3.22253
12847	48	4	15	YDR290W	YDR290W	-0.903058	6.9586	-2.98568	0.0218068	0.503556	-3.2269
12320	46	5	16	YER046W	SPO73	-0.277543	7.5327	-2.98402	0.0218565	0.503556	-3.22915
7496	28	10	8	YKL082C	RRP14	0.26928	8.91561	2.98274	0.0218949	0.503556	-3.23089
10720	40	7	16	YGR212W	SLI1	-0.267429	8.12714	-2.98055	0.0219605	0.503556	-3.23386
12246	46	1	6	YBL077W	YBL077W	-0.276484	9.01475	-2.98025	0.0219696	0.503556	-3.23427
12837	48	4	5	YDR342C	HXT7	0.272116	10.2574	2.97622	0.022091	0.503556	-3.23973
10250	38	12	10	YML124C	TUB3	0.267868	8.6712	2.9758	0.0221038	0.503556	-3.2403
9541	36	2	5	YBR237W	PRP5	-0.282963	9.05749	-2.97554	0.0221117	0.503556	-3.24066
11529	43	7	9	YHR019C	DED81	0.266503	10.2997	2.97484	0.0221329	0.503556	-3.24161
8133	30	16	5	YPL203W	TPK2	0.289713	7.86465	2.97411	0.0221551	0.503556	-3.2426
11183	42	2	15	YBR194W	AIM4	-0.265489	7.00927	-2.97403	0.0221574	0.503556	-3.24271
7952	30	4	16	YDR275W	BSC2	-0.259481	8.14644	-2.97333	0.0221788	0.503556	-3.24366
12867	48	6	3	YGL105W	ARC1	-0.262171	10.2018	-2.96812	0.0223377	0.503556	-3.25073
9813	37	2	5	YDL009C	YDL009C	-0.333154	7.20213	-2.9678	0.0223477	0.503556	-3.25118
10351	39	1	15	YBR090C-A	YBR090C-A	-0.447024	8.79223	-2.96778	0.0223482	0.503556	-3.2512
12380	46	9	12	YJL197W	UBP12	-0.258759	7.88972	-2.96733	0.0223621	0.503556	-3.25181
11845	44	10	5	YKL145W	RPT1	0.274963	10.2423	2.96713	0.0223683	0.503556	-3.25209
3144	12	10	8	YKL066W	YKL066W	0.448476	9.67892	2.96434	0.022454	0.503556	-3.25588
5294	20	8	14	YHR180W	YHR180W	-0.259961	6.85151	-2.96398	0.0224649	0.503556	-3.25636
1326	5	15	14	YOR377W	ATF1	-0.276042	8.08895	-2.96357	0.0224775	0.503556	-3.25691
3919	15	7	15	YHR033W	YHR033W	0.260206	7.16201	2.96346	0.0224809	0.503556	-3.25707
817	4	1	1	YAL055W	PEX22	0.260155	7.43927	2.96248	0.0225111	0.503556	-3.2584
285	2	1	13	YAL048C	GEM1	0.261759	9.1263	2.96206	0.0225243	0.503556	-3.25898
12369	46	9	1	YJR024C	MDE1	-0.273013	9.10123	-2.96143	0.0225437	0.503556	-3.25983
9103	34	8	15	YHR149C	SKG6	0.293079	8.68313	2.96018	0.0225825	0.503556	-3.26153
12410	46	11	10	YLR226W	BUR2	0.258779	7.96705	2.95773	0.0226585	0.503556	-3.26486
11969	45	1	1	YBR153W	RIB7	-0.272885	8.69473	-2.95557	0.0227257	0.503556	-3.2678
773	3	15	5	YOR285W	RDL1	0.426904	10.5012	2.95463	0.022755	0.503556	-3.26907
7563	28	14	11	YNL265C	IST1	-0.278909	7.92322	-2.95356	0.0227886	0.503556	-3.27053
9953	37	11	1	YLR413W	YLR413W	0.363439	10.3317	2.95317	0.0228007	0.503556	-3.27106
3609	14	5	9	YER062C	HOR2	0.286412	9.01676	2.95287	0.02281	0.503556	-3.27146
10843	40	15	11	YOR171C	LCB4	0.280895	7.93668	2.94718	0.0229891	0.504093	-3.27921
9586	36	5	2	YEL076C-A	YEL076C-A	-0.258416	8.70373	-2.94475	0.0230658	0.504093	-3.28251
8406	31	16	6	YPR111W	DBF20	0.258072	7.62804	2.94288	0.0231254	0.504093	-3.28506
9671	36	10	7	YKL090W	CUE2	0.256631	7.81771	2.94127	0.0231767	0.504093	-3.28726
3583	14	3	15	YDL125C	HNT1	-0.263786	10.4473	-2.94104	0.023184	0.504093	-3.28757
4298	16	14	10	YNR054C	ESF2	0.262631	8.30214	2.94035	0.023206	0.504093	-3.28851
107	1	7	11	YGR279C	SCW4	0.256473	12.2749	2.94006	0.023215	0.504093	-3.28889
11903	44	13	15	YMR225C	MRPL44	-0.27332	9.97271	-2.93983	0.0232224	0.504093	-3.28921
6021	23	3	5	YDR127W	ARO1	-0.256713	8.56883	-2.93965	0.0232282	0.504093	-3.28946
9143	34	11	7	YLR076C	YLR076C	-0.257666	11.3322	-2.93842	0.0232677	0.504093	-3.29114
7081	27	1	9	YBR038W	CHS2	-0.268935	7.0381	-2.93658	0.0233266	0.504093	-3.29364
1565	6	13	13	YMR325W	PAU19	-0.275203	8.06128	-2.93437	0.0233975	0.504093	-3.29665
11834	44	9	10	YJL148W	RPA34	0.410086	9.91293	2.93107	0.023504	0.504093	-3.30115
4727	18	7	7	YGR105W	VMA21	-0.260143	8.1018	-2.931	0.0235061	0.504093	-3.30123
839	4	2	7	YBR158W	AMN1	0.329528	10.8316	2.93035	0.0235272	0.504093	-3.30212
3012	12	2	4	YBR167C	POP7	-0.262522	7.35488	-2.92908	0.0235683	0.504093	-3.30385
12599	47	6	7	YGR032W	GSC2	-0.255416	9.38245	-2.92906	0.023569	0.504093	-3.30388
10313	38	16	9	YPL209C	IPL1	0.286099	6.77877	2.92851	0.0235868	0.504093	-3.30463
12743	47	15	7	YOR372C	NDD1	0.262951	8.73668	2.92589	0.023672	0.504093	-3.3082
8535	32	7	7	YGR208W	SER2	-0.422771	8.8344	-2.92424	0.0237258	0.504093	-3.31044
11927	44	15	7	YOR085W	OST3	0.308643	10.2918	2.92399	0.0237342	0.504093	-3.31079
12046	45	5	14	YFR015C	GSY1	0.366124	7.68332	2.92376	0.0237416	0.504093	-3.3111
6554	25	2	10	YCR031C	RPS14A	-0.255014	11.1954	-2.92303	0.0237654	0.504093	-3.3121
6375	24	8	7	YIL011W	TIR3	-0.254702	9.10872	-2.92064	0.0238438	0.504093	-3.31536
7659	29	3	11	YDR086C	SSS1	-0.298544	9.08158	-2.91797	0.0239317	0.504093	-3.319
7870	29	16	14	YPR108W	RPN7	0.254965	9.50604	2.91664	0.0239755	0.504093	-3.32081
558	3	1	14	YBR012W-B	YBR012W-B	-0.311075	7.49004	-2.91618	0.0239909	0.504093	-3.32144
12069	45	7	5	YHR115C	DMA1	0.25416	8.38204	2.91466	0.0240411	0.504093	-3.32351
6501	24	16	5	YPL194W	DDC1	0.255389	6.92948	2.91399	0.0240631	0.504093	-3.32442
11334	42	12	6	YML043C	RRN11	0.256	7.45809	2.91351	0.0240793	0.504093	-3.32508
5798	22	6	6	YGL128C	CWC23	-0.254886	9.10432	-2.91266	0.0241072	0.504093	-3.32623
1274	5	12	10	YMR145C	NDE1	0.262274	7.78966	2.9126	0.0241093	0.504093	-3.32632
7705	29	6	9	YGR063C	SPT4	-0.258231	8.97475	-2.91088	0.0241667	0.504484	-3.32867
9577	36	4	9	YDR236C	FMN1	-0.296701	8.80068	-2.90658	0.0243104	0.504662	-3.33454
11178	42	2	10	YBR244W	GPX2	-0.254308	8.02107	-2.90339	0.0244176	0.504662	-3.33889
3822	15	1	14	YBR114W	RAD16	-0.253266	9.40707	-2.90299	0.0244308	0.504662	-3.33943
7499	28	10	11	YKL080W	VMA5	0.253565	10.7159	2.90155	0.0244795	0.504662	-3.3414
2147	8	16	3	YPL132W	COX11	0.290286	8.32341	2.90089	0.0245019	0.504662	-3.3423
12612	47	7	4	YHR069C	RRP4	0.254015	8.30811	2.90036	0.0245198	0.504662	-3.34303
7623	29	1	7	YBR088C	POL30	-0.272542	8.05464	-2.89904	0.0245643	0.504662	-3.34482
10260	38	13	4	YMR316C-B	YMR316C-B	-0.260297	6.8321	-2.89772	0.0246091	0.504662	-3.34663
1091	5	1	3	YBR067C	TIP1	-0.323677	8.28611	-2.89343	0.0247555	0.504662	-3.35249
6301	24	3	13	YDL179W	PCL9	-0.268431	7.85079	-2.89147	0.0248225	0.504662	-3.35517
4747	18	8	11	YHR137W	ARO9	0.270058	8.62369	2.89069	0.0248491	0.504662	-3.35623
3821	15	1	13	YBR114W	RAD16	-0.261831	9.40721	-2.89048	0.0248562	0.504662	-3.35651
689	3	10	1	YKR074W	AIM29	-0.276076	8.72712	-2.88972	0.0248826	0.504662	-3.35756
1207	5	8	7	YIR010W	DSN1	0.267009	7.69196	2.88931	0.0248964	0.504662	-3.35811
7433	28	6	9	YGL037C	PNC1	0.73254	9.89014	2.88894	0.0249094	0.504662	-3.35863
12875	48	6	11	YGL101W	YGL101W	-0.265668	8.31284	-2.88891	0.0249104	0.504662	-3.35867
3194	12	13	10	YMR243C	ZRC1	0.252077	9.87293	2.88855	0.0249228	0.504662	-3.35916
11377	42	15	1	YOR136W	IDH2	0.259132	7.14243	2.88724	0.024968	0.504662	-3.36095
11065	41	12	9	YMR091C	NPL6	-0.253095	9.26672	-2.88445	0.0250644	0.504662	-3.36476
1998	8	6	14	YGL107C	RMD9	0.419764	8.58233	2.88432	0.0250687	0.504662	-3.36493
4101	16	2	5	YCL007C	CWH36	-0.275103	7.58348	-2.88419	0.0250734	0.504662	-3.36512
6336	24	5	16	YER022W	SRB4	-0.260559	7.69103	-2.88412	0.0250757	0.504662	-3.36521
7467	28	8	11	YHR143W	DSE2	0.252263	11.2549	2.88236	0.0251366	0.504662	-3.36761
11232	42	5	16	YEL033W	MTC7	-0.298609	11.13	-2.88161	0.0251628	0.504662	-3.36864
6224	23	15	16	YOR344C	TYE7	0.255371	8.61078	2.8812	0.025177	0.504662	-3.36919
5643	21	13	11	YNL162W	RPL42a	-0.321201	11.9473	-2.87892	0.0252566	0.504662	-3.37232
12794	48	1	10	YBL074C	AAR2	0.266463	7.30309	2.87845	0.025273	0.504662	-3.37296
12170	45	13	10	YNL234W	YNL234W	0.260679	7.56225	2.87814	0.0252837	0.504662	-3.37338
10434	39	7	2	YHR108W	GGA2	0.269025	8.43696	2.87764	0.0253012	0.504662	-3.37406
7438	28	6	14	YGL035C	MIG1	-0.404948	7.80849	-3.02481	0.0253356	0.504662	-3.10661
3920	15	7	16	YHR033W	YHR033W	0.252518	7.1846	2.87287	0.0254688	0.506542	-3.38059
9993	37	13	9	YNL226W	YNL226W	-0.268645	6.74074	-2.87147	0.0255179	0.506746	-3.3825
179	1	12	3	YMR011W	HXT2	-0.251441	11.6156	-2.87023	0.025562	0.506849	-3.3842
913	4	7	1	YGR138C	TPO2	0.355305	8.60573	2.86735	0.0256641	0.507838	-3.38815
10456	39	8	8	YIR041W	PAU15	-0.341149	7.97906	-2.86584	0.0257176	0.507838	-3.39021
12527	47	1	15	YBR098W	MMS4	0.935338	7.61611	2.8652	0.0257403	0.507838	-3.39108
2410	9	15	10	YOR292C	YOR292C	0.253697	8.38458	2.86444	0.0257675	0.507838	-3.39213
3933	15	8	13	YJL017W	YJL017W	0.250804	8.09288	2.86253	0.0258356	0.508413	-3.39474
2292	9	8	4	YIL101C	XBP1	0.269779	6.87419	2.85478	0.0261142	0.512844	-3.40534
12077	45	7	13	YHR111W	UBA4	0.269419	8.56467	2.85383	0.0261489	0.512844	-3.40665
9644	36	8	12	YHR150W	PEX28	0.249173	8.01499	2.85224	0.0262065	0.512844	-3.40883
6400	24	9	16	YJL170C	ASG7	-0.256249	6.29798	-2.85192	0.026218	0.512844	-3.40926
11204	42	4	4	YDR201W	SPC19	-0.252659	7.48851	-2.84952	0.0263056	0.513786	-3.41256
2481	10	3	1	YDL083C	RPS16b	-0.248474	11.4591	-2.84733	0.0263852	0.513799	-3.41554
12876	48	6	12	YGL101W	YGL101W	-0.275137	8.26519	-2.84667	0.0264097	0.513799	-3.41646
1962	8	4	10	YDR300C	PRO1	-0.254345	8.88888	-2.84513	0.0264659	0.513799	-3.41856
10363	39	2	11	YCR087W	YCR087W	-0.332873	7.93957	-2.84444	0.0264913	0.513799	-3.41951
6284	24	2	12	YBR267W	REI1	-0.275991	8.17471	-2.84412	0.0265032	0.513799	-3.41995
4329	16	16	9	YPL184C	MRN1	0.272257	9.25011	2.84183	0.0265874	0.513995	-3.42309
2773	11	4	5	YDR406W	PDR15	-0.333212	8.26208	-2.84163	0.0265947	0.513995	-3.42336
8486	32	4	6	YDR326C	YSP2	0.606899	8.74	2.84063	0.0266315	0.513995	-3.42473
7469	28	8	13	YHR188C	GPI16	-0.285767	8.95243	-2.83751	0.0267472	0.514473	-3.42901
8502	32	5	6	YER078C	ICP55	0.401589	7.57383	2.83631	0.0267917	0.514473	-3.43065
6749	25	14	13	YOL088C	MPD2	0.264432	8.45527	2.83616	0.0267972	0.514473	-3.43086
9851	37	4	11	YDR477W	SNF1	0.247418	8.05291	2.83571	0.026814	0.514473	-3.43148
9288	35	3	8	YDL247W	MPH2	0.248231	7.31996	2.83345	0.0268982	0.514863	-3.43458
12099	45	9	3	YKL006C-A	SFT1	-0.247225	11.8313	-2.83305	0.0269132	0.514863	-3.43512
5250	20	6	2	YGL033W	HOP2	0.247942	6.49711	2.8306	0.0270049	0.515802	-3.43849
10335	38	17	15	YPR184W	GDB1	0.255404	6.9157	2.82887	0.0270696	0.515802	-3.44085
6438	24	12	6	YML110C	COQ5	0.332319	8.84918	2.82857	0.0270809	0.515802	-3.44126
9377	35	9	1	YJR111C	YJR111C	0.294816	8.06875	2.82736	0.0271266	0.51592	-3.44293
4526	17	11	14	YLR295C	ATP14	0.263433	8.20056	2.82595	0.0271796	0.516175	-3.44486
5918	22	13	14	YNL015W	PBI2	0.383985	8.5185	2.82463	0.0272297	0.516374	-3.44668
11459	43	3	3	YDR009W	GAL3	0.255011	6.46034	2.82157	0.0273456	0.517255	-3.45087
6358	24	7	6	YGR248W	SOL4	0.263398	6.31012	2.82021	0.0273974	0.517255	-3.45274
1051	4	15	11	YOR043W	WHI2	0.245873	9.83663	2.81923	0.0274347	0.517255	-3.45409
7434	28	6	10	YGL037C	PNC1	0.818144	9.8577	2.81796	0.0274829	0.517416	-3.45582
6924	26	8	12	YHR143W-A	RPC10	-0.251275	7.95504	-2.8166	0.0275349	0.517648	-3.45769
1937	8	3	1	YDL169C	UGX2	0.295834	6.41386	2.81497	0.0275976	0.518027	-3.45993
10258	38	13	2	YNL037C	IDH1	0.272624	8.02157	2.81278	0.0276816	0.518027	-3.46293
5374	20	13	14	YMR250W	GAD1	0.308082	8.14381	2.81244	0.0276948	0.518027	-3.46341
1566	6	13	14	YMR325W	PAU19	-0.273695	8.01994	-2.81105	0.0277483	0.518027	-3.46531
12544	47	2	16	YCR093W	CDC39	-0.271507	7.96842	-2.81091	0.0277536	0.518027	-3.4655
3460	13	13	4	YNL158W	PGA1	0.251739	7.75287	2.809	0.0278273	0.518237	-3.46812
6919	26	8	7	YHR145C	YHR145C	-0.355445	9.64907	-2.807	0.027905	0.518237	-3.47087
9292	35	3	12	YDL245C	HXT15	0.281587	7.17371	2.80608	0.0279406	0.518237	-3.47213
12456	46	14	8	YNR041C	COQ2	-0.246096	10.0238	-2.80539	0.0279674	0.518237	-3.47308
11823	44	8	15	YHR156C	LIN1	-0.284878	7.70572	-2.80427	0.0280112	0.518237	-3.47462
11356	42	13	12	YMR228W	MTF1	0.279473	7.94983	2.80291	0.0280641	0.518237	-3.47649
8662	32	15	6	YOR213C	SAS5	0.248704	8.7184	2.8024	0.0280842	0.518237	-3.47719
9764	36	16	4	YPL068C	YPL068C	0.274676	7.21345	2.79978	0.0281867	0.518237	-3.48079
4527	17	11	15	YLR248W	RCK2	0.249778	9.97523	2.79896	0.0282189	0.518237	-3.48192
12318	46	5	14	YER090W	TRP2	0.24651	8.55062	2.79861	0.0282324	0.518237	-3.48239
8726	33	2	6	YCR041W	YCR041W	-0.278833	6.69346	-2.79808	0.0282535	0.518237	-3.48313
10423	39	6	7	YGR024C	THG1	-0.24561	9.02908	-2.79781	0.0282639	0.518237	-3.48349
8641	32	14	1	YNR074C	AIF1	-0.326407	8.60518	-2.79556	0.0283526	0.518237	-3.48659
7656	29	3	8	YDR088C	SLU7	0.243846	7.93963	2.79454	0.0283928	0.518237	-3.48798
12741	47	15	5	YPL026C	SKS1	0.243733	8.18303	2.79398	0.0284152	0.518237	-3.48876
8640	32	13	16	YMR303C	ADH2	0.312731	11.5184	2.79364	0.0284284	0.518237	-3.48922
7495	28	10	7	YKL082C	RRP14	0.244047	9.14163	2.79323	0.0284447	0.518237	-3.48979
12561	47	4	1	YDR536W	STL1	0.263463	6.81058	2.79235	0.0284798	0.518237	-3.491
7354	28	1	10	YAR008W	SEN34	0.269915	8.12079	2.79023	0.0285637	0.518667	-3.49391
11397	42	16	5	YPL123C	RNY1	0.270432	7.37273	2.78975	0.0285829	0.518667	-3.49457
770	3	15	2	YOR287C	RRP36	0.264851	7.51198	2.78769	0.0286651	0.518724	-3.4974
8327	31	11	7	YLR354C	TAL1	0.326896	10.968	2.78768	0.0286656	0.518724	-3.49742
6993	26	13	1	YMR264W	CUE1	0.621442	8.90564	2.78659	0.0287092	0.518794	-3.49892
8404	31	16	4	YPR065W	ROX1	0.261019	8.06879	2.78404	0.0288112	0.519916	-3.50242
14	1	1	14	YBR013C	YBR013C	-0.252672	8.56758	-2.78273	0.0288637	0.520145	-3.50422
3993	15	12	9	YMR152W	YIM1	0.309491	9.03757	2.78098	0.0289344	0.520699	-3.50663
8647	32	14	7	YNR024W	MPP6	0.259416	8.01108	2.77903	0.029013	0.52131	-3.50931
2323	9	10	3	YKR035C	OPI8	-0.294811	8.84962	-2.7781	0.0290506	0.52131	-3.51059
4276	16	13	4	YMR294W	JNM1	0.27606	7.02032	2.77611	0.0291313	0.52131	-3.51333
12684	47	11	12	YLR368W	MDM30	0.242032	8.01226	2.77543	0.0291592	0.52131	-3.51427
443	2	11	11	YLR042C	YLR042C	-0.264998	7.05483	-2.77211	0.0292945	0.52131	-3.51884
7025	26	15	1	YOR120W	GCY1	0.241651	7.43919	2.77097	0.0293409	0.52131	-3.5204
5917	22	13	13	YNL015W	PBI2	0.378432	8.5183	2.77091	0.0293434	0.52131	-3.52048
10433	39	7	1	YHR108W	GGA2	0.263155	8.7758	2.76883	0.0294288	0.52131	-3.52335
7749	29	9	5	YKL035W	UGP1	0.257941	9.16072	2.76803	0.0294615	0.52131	-3.52444
9632	36	7	16	YGR116W	SPT6	-0.245211	6.40753	-2.76742	0.0294865	0.52131	-3.52528
2171	8	17	11	YPR149W	NCE102	0.468446	10.2297	2.7672	0.0294955	0.52131	-3.52558
12721	47	14	1	YOR039W	CKB2	0.3877	8.40606	2.76719	0.0294961	0.52131	-3.5256
11992	45	2	8	YCR097WB	YCR097WB	-0.258677	8.23047	-2.76626	0.0295345	0.52131	-3.52689
1132	5	3	12	YDR062W	LCB2	0.276319	9.05283	2.76547	0.029567	0.52131	-3.52797
9309	35	4	13	YDR426C	YDR426C	-0.24945	8.55549	-2.76498	0.0295873	0.52131	-3.52865
156	1	10	12	YKR023W	YKR023W	0.241008	8.72507	2.76362	0.0296435	0.52131	-3.53052
8498	32	5	2	YER080W	AIM9	0.260942	9.69406	2.76352	0.0296476	0.52131	-3.53066
6947	26	10	3	YKL085W	MDH1	0.336495	7.66221	2.76211	0.0297062	0.521637	-3.5326
1723	7	6	11	YGL253W	HXK2	-0.278621	11.3666	-2.7594	0.0298186	0.521876	-3.53633
769	3	15	1	YOR287C	RRP36	0.261949	7.63951	2.75902	0.0298342	0.521876	-3.53685
8437	32	1	5	YBL060W	YEL1	0.370113	8.20868	2.75836	0.0298617	0.521876	-3.53775
4356	17	1	4	YBL101W-B	YBL101W-B	-0.29092	8.99316	-2.75793	0.0298798	0.521876	-3.53835
5520	21	5	16	YFL016C	MDJ1	0.286211	8.36017	2.75673	0.0299298	0.52205	-3.54
3934	15	8	14	YJL017W	YJL017W	0.251086	7.96851	2.75357	0.0300622	0.522639	-3.54435
8725	33	2	5	YCR041W	YCR041W	-0.297708	6.73255	-2.75344	0.0300677	0.522639	-3.54453
5761	22	4	1	YDR321W	ASP1	-0.2404	9.25395	-2.75187	0.0301337	0.522639	-3.54669
5217	20	4	1	YDR224C	HTB1	0.28361	11.2288	2.75179	0.0301373	0.522639	-3.54681
7660	29	3	12	YDR086C	SSS1	-0.269846	8.95173	-2.75078	0.0301798	0.522639	-3.5482
12075	45	7	11	YHR066W	SSF1	0.239757	8.29493	2.74872	0.0302665	0.522639	-3.55103
10178	38	8	2	YIL077C	YIL077C	0.26967	7.60311	2.74836	0.0302817	0.522639	-3.55153
5692	21	16	12	YPR054W	SMK1	0.27299	7.38623	2.74538	0.0304085	0.522639	-3.55565
6335	24	5	15	YER022W	SRB4	-0.239654	7.65885	-2.74523	0.0304147	0.522639	-3.55585
5644	21	13	12	YNL162W	RPL42a	-0.314107	11.8305	-2.74467	0.0304385	0.522639	-3.55662
7729	29	8	1	YJL041W	NSP1	0.282047	8.35088	2.7444	0.0304501	0.522639	-3.55699
6642	25	8	2	YIL165C	YIL165C	-0.239558	7.21039	-2.7443	0.0304541	0.522639	-3.55712
9907	37	8	3	YIR044C	YIR044C	-0.400489	7.26821	-2.74313	0.0305042	0.522639	-3.55874
2422	9	16	6	YPL283C	YRF1-7	0.25081	9.77855	2.74082	0.0306028	0.522639	-3.56193
1887	7	16	15	YPR035W	GLN1	0.302327	10.0492	2.73985	0.0306442	0.522639	-3.56326
4813	18	12	13	YML017W	PSP2	0.335311	7.67634	2.73982	0.0306457	0.522639	-3.56331
8328	31	11	8	YLR354C	TAL1	0.296418	10.8717	2.73919	0.0306726	0.522639	-3.56417
12148	45	12	4	YMR141C	YMR141C	-0.247867	7.87994	-2.73891	0.0306846	0.522639	-3.56455
8352	31	12	16	YMR119W-A	YMR119W-A	-0.247625	8.66925	-2.73691	0.0307705	0.523121	-3.56731
7869	29	16	13	YPR108W	RPN7	0.238705	9.45266	2.73639	0.030793	0.523121	-3.56803
6298	24	3	10	YDL181W	INH1	0.244149	7.59101	2.72847	0.0311361	0.528261	-3.57895
8639	32	13	15	YMR303C	ADH2	0.337823	11.6186	2.72625	0.0312328	0.529094	-3.58201
6969	26	11	9	YLR114C	AVL9	0.265809	8.43774	2.72549	0.0312663	0.529094	-3.58306
4253	16	11	13	YLR191W	PEX13	0.23907	8.53828	2.72362	0.0313482	0.529783	-3.58564
7108	27	3	4	YDL241W	YDL241W	-0.239546	6.64572	-2.72206	0.0314166	0.529783	-3.58779
4570	17	14	10	YOL082W	ATG19	0.245613	8.09079	2.72105	0.0314613	0.529783	-3.58919
5405	20	15	13	YOR105W	YOR105W	-0.244704	7.38454	-2.72086	0.0314695	0.529783	-3.58944
12614	47	7	6	YHR114W	BZZ1	0.267425	8.26124	2.71991	0.0315113	0.529804	-3.59075
12426	46	12	10	YML132W	COS3	0.247768	11.0191	2.71481	0.0317372	0.53278	-3.59779
5762	22	4	2	YDR321W	ASP1	-0.237501	9.13764	-2.71083	0.031915	0.53278	-3.60329
2261	9	6	5	YGL216W	KIP3	0.240279	7.56646	2.71066	0.0319224	0.53278	-3.60352
12959	48	11	15	YLR175W	CBF5	0.309505	10.3332	2.7101	0.0319476	0.53278	-3.6043
10837	40	15	5	YOR221C	MCT1	0.241093	9.18838	2.70999	0.0319525	0.53278	-3.60445
12073	45	7	9	YHR113W	APE4	0.280259	8.12221	2.70983	0.0319594	0.53278	-3.60466
2025	8	8	9	YIL040W	APQ12	-0.237104	9.2118	-2.70633	0.0321168	0.53278	-3.6095
11639	43	14	7	YOL058W	ARG1	-0.251758	8.37013	-2.70555	0.032152	0.53278	-3.61058
6217	23	15	9	YOR394W	PAU21	-0.284086	8.29032	-2.70453	0.0321978	0.53278	-3.61198
5253	20	6	5	YGL031C	RPL24a	-0.260554	11.6248	-2.70433	0.0322071	0.53278	-3.61226
8556	32	8	12	YIL016W	SNL1	-0.236364	7.79945	-2.70305	0.0322649	0.53278	-3.61403
10814	40	13	14	YNL030W	HHF2	-0.27856	11.6611	-2.70294	0.0322696	0.53278	-3.61417
10395	39	4	11	YDR476C	YDR476C	-0.261929	8.76209	-2.70258	0.0322861	0.53278	-3.61468
12934	48	10	6	YKR016W	FCJ1	0.236532	7.89103	2.70169	0.0323262	0.53278	-3.6159
6187	23	13	11	YNL161W	CBK1	0.255948	8.55771	2.69978	0.0324132	0.53278	-3.61855
7706	29	6	10	YGR063C	SPT4	-0.256395	8.68081	-2.69825	0.0324829	0.53278	-3.62066
12372	46	9	4	YJL201W	ECM25	0.236016	8.30379	2.69759	0.032513	0.53278	-3.62157
4277	16	13	5	YNL010W	YNL010W	0.236268	10.4485	2.69726	0.0325278	0.53278	-3.62202
3791	14	16	15	YPL135W	ISU1	0.263692	8.78534	2.69609	0.0325811	0.53278	-3.62363
846	4	2	14	YBR201W	DER1	-0.242106	8.38866	-2.69598	0.0325864	0.53278	-3.62379
12641	47	9	1	YKL052C	ASK1	-0.251587	8.41511	-2.69341	0.0327041	0.53278	-3.62734
11734	44	3	6	YDL112W	TRM3	-0.239179	8.5526	-2.69325	0.0327114	0.53278	-3.62756
7124	27	4	4	YDR376W	ARH1	0.238576	7.93484	2.68963	0.0328782	0.53278	-3.63257
9299	35	4	3	YDR384C	ATO3	-0.24347	8.48456	-2.68929	0.0328939	0.53278	-3.63304
11467	43	3	11	YDR005C	MAF1	0.276717	8.29947	2.6892	0.032898	0.53278	-3.63316
12078	45	7	14	YHR111W	UBA4	0.234827	8.5265	2.68782	0.0329615	0.53278	-3.63506
12810	48	2	10	YCL038C	ATG22	0.235345	8.85836	2.68679	0.0330091	0.53278	-3.63648
8114	30	15	2	YOR216C	RUD3	0.252808	7.82921	2.68543	0.0330725	0.53278	-3.63836
8436	32	1	4	YBL014C	RRN6	0.240347	7.89971	2.68393	0.0331422	0.53278	-3.64044
8680	32	16	8	YPL154C	PEP4	0.452136	10.6101	2.68142	0.0332591	0.53278	-3.6439
12362	46	8	10	YIL082W	YIL082W	-0.240879	8.11757	-2.68114	0.0332725	0.53278	-3.6443
9914	37	8	10	YJL045W	YJL045W	0.235051	6.56049	2.6807	0.0332929	0.53278	-3.6449
11666	43	16	2	YPR033C	HTS1	0.234484	9.39603	2.68046	0.0333039	0.53278	-3.64523
5290	20	8	10	YHR182W	YHR182W	0.235783	7.21382	2.67973	0.0333383	0.53278	-3.64624
2129	8	15	1	YOR191W	ULS1	0.258981	7.51659	2.67878	0.033383	0.53278	-3.64756
9358	35	7	14	YHR009C	TDA3	0.256247	8.59448	2.67791	0.0334238	0.53278	-3.64876
8854	33	10	6	YKR105C	VBA5	0.233452	8.89156	2.677	0.0334663	0.53278	-3.65001
1654	7	2	6	YCR104W	PAU3	-0.23608	7.01922	-2.67542	0.0335409	0.53278	-3.6522
9768	36	16	8	YPL066W	RGL1	0.235985	8.16008	2.67533	0.0335447	0.53278	-3.65231
12076	45	7	12	YHR066W	SSF1	0.238314	8.25932	2.67523	0.0335497	0.53278	-3.65246
3015	12	2	7	YBR165W	UBS1	-0.234003	8.36038	-2.67513	0.0335545	0.53278	-3.6526
3007	12	1	15	YAL010C	MDM10	0.233664	8.03829	2.67454	0.0335823	0.53278	-3.65342
3322	13	4	10	YDR501W	PLM2	0.250736	6.77693	2.67446	0.033586	0.53278	-3.65352
13022	48	15	14	YOR225W	YOR225W	-0.279349	7.24217	-2.67443	0.0335872	0.53278	-3.65356
2398	9	14	14	YOL071W	EMI5	0.254444	7.87023	2.67345	0.0336336	0.53278	-3.65492
1155	5	5	3	YFL008W	SMC1	-0.235247	8.21552	-2.67254	0.0336769	0.53278	-3.65618
5801	22	6	9	YGL126W	SCS3	-0.273224	8.43844	-2.67247	0.03368	0.53278	-3.65627
29	1	2	13	YCR008W	SAT4	0.325419	9.12951	2.67105	0.0337472	0.53278	-3.65823
9916	37	8	12	YIR040C	YIR040C	-0.275482	6.38326	-2.6704	0.0337782	0.53278	-3.65914
8246	31	6	6	YGR064W	YGR064W	-0.235393	8.11309	-2.67032	0.0337817	0.53278	-3.65924
8103	30	14	7	YNR025C	YNR025C	-0.249739	7.7744	-2.66987	0.0338033	0.53278	-3.65987
318	2	3	14	YDL069C	CBS1	-0.239744	7.64224	-2.66969	0.0338117	0.53278	-3.66011
10505	39	11	9	YLR408C	BLS1	-0.244852	7.40093	-2.66749	0.0339166	0.533788	-3.66316
4366	17	1	14	YBR029C	CDS1	-0.239708	8.62034	-2.66226	0.0341668	0.536204	-3.67039
4978	19	6	2	YGL225W	VRG4	-0.271802	10.5202	-2.66217	0.0341713	0.536204	-3.67052
720	3	11	16	YLR231C	BNA5	0.234639	8.95451	2.66171	0.0341934	0.536204	-3.67115
6361	24	7	9	YGR246C	BRF1	0.36966	8.05383	2.66053	0.0342501	0.536448	-3.67278
9300	35	4	4	YDR384C	ATO3	-0.23235	8.28549	-2.65887	0.0343303	0.536536	-3.67508
11344	42	12	16	YLR463C	YLR463C	-0.242178	8.24091	-2.65686	0.0344276	0.536536	-3.67786
1118	5	2	14	YCR101C	YCR101C	1.02379	7.13523	2.65578	0.0344799	0.536536	-3.67936
2082	8	12	2	YML098W	TAF13	0.27557	8.71384	2.6549	0.0345223	0.536536	-3.68056
6205	23	14	13	YOR009W	TIR4	-0.256172	8.22364	-2.65471	0.0345318	0.536536	-3.68083
3465	13	13	9	YNL202W	SPS19	0.232552	6.81566	2.65391	0.0345709	0.536536	-3.68195
4243	16	11	3	YLR149C	YLR149C	0.327757	10.5539	2.65251	0.0346389	0.536536	-3.68388
11131	41	16	11	YPL265W	DIP5	0.311721	8.70287	2.65245	0.034642	0.536536	-3.68397
2421	9	16	5	YPL283C	YRF1-7	0.248361	9.8541	2.65225	0.0346516	0.536536	-3.68424
12047	45	5	15	YFL037W	TUB2	0.234574	9.38163	2.65116	0.0347048	0.536536	-3.68575
9310	35	4	14	YDR426C	YDR426C	-0.239049	8.44844	-2.65109	0.0347081	0.536536	-3.68584
840	4	2	8	YBR158W	AMN1	0.27889	10.9272	2.6426	0.0351255	0.540662	-3.69759
5811	22	7	3	YGR203W	YCH1	-0.249239	7.00831	-2.64216	0.0351472	0.540662	-3.6982
7491	28	10	3	YKL084W	HOT13	-0.247157	7.70388	-2.64212	0.0351494	0.540662	-3.69826
6553	25	2	9	YCR031C	RPS14A	-0.234863	11.231	-2.64187	0.0351616	0.540662	-3.6986
10314	38	16	10	YPL209C	IPL1	0.230513	6.75348	2.64146	0.0351822	0.540662	-3.69917
7192	27	8	8	YIL114C	POR2	-0.230192	8.38869	-2.63958	0.0352755	0.541444	-3.70178
12152	45	12	8	YMR139W	RIM11	0.291183	9.08636	2.63876	0.0353161	0.541444	-3.70291
10779	40	11	11	YLR169W	YLR169W	-0.273221	7.5538	-2.63666	0.0354205	0.541567	-3.70581
11633	43	14	1	YOL109W	ZEO1	0.230712	10.9901	2.63662	0.0354227	0.541567	-3.70587
12822	48	3	6	YDL207W	GLE1	0.247082	7.92438	2.63528	0.0354895	0.541567	-3.70772
4791	18	11	7	YLR060W	FRS1	0.230693	10.0495	2.63389	0.0355592	0.541567	-3.70965
3911	15	7	7	YHR037W	PUT2	0.231824	7.94873	2.63361	0.0355732	0.541567	-3.71003
7049	26	16	9	YPL105C	SYH1	0.236447	8.39837	2.62924	0.0357933	0.542372	-3.71609
7149	27	5	13	YER167W	BCK2	0.232622	8.30582	2.62874	0.0358183	0.542372	-3.71678
11229	42	5	13	YER001W	MNN1	0.271084	8.55895	2.62839	0.0358358	0.542372	-3.71726
8134	30	16	6	YPL203W	TPK2	0.300905	7.80292	2.62785	0.0358635	0.542372	-3.71802
11586	43	11	2	YLR324W	PEX30	0.229263	7.55778	2.62652	0.0359304	0.542372	-3.71985
10449	39	8	1	YJL048C	UBX6	0.290189	9.1225	2.62562	0.0359763	0.542372	-3.7211
12625	47	8	1	YJL056C	ZAP1	0.229278	8.4752	2.62558	0.0359781	0.542372	-3.72115
8582	32	10	6	YKL225W	YKL225W	-0.234001	6.8148	-2.62432	0.0360424	0.542372	-3.7229
5439	20	17	15	YPR195C	YPR195C	-0.247232	6.66256	-2.62291	0.0361137	0.542372	-3.72484
3069	12	5	13	YEL048C	TCA17	-0.246837	7.99851	-2.62235	0.0361425	0.542372	-3.72563
317	2	3	13	YDL069C	CBS1	-0.234775	7.48048	-2.62146	0.0361879	0.542372	-3.72686
10977	41	7	1	YHR024C	MAS2	0.228666	8.30112	2.62135	0.0361936	0.542372	-3.72701
2324	9	10	4	YKR035C	OPI8	-0.305601	8.8591	-2.62032	0.0362464	0.542372	-3.72844
9290	35	3	10	YDR045C	RPC11	-0.229527	8.08147	-2.61914	0.0363063	0.542372	-3.73007
9807	37	1	15	YBR091C	TIM12	-0.315355	6.84946	-2.61886	0.036321	0.542372	-3.73046
7363	28	2	3	YBR183W	YPC1	0.28451	7.75349	2.6187	0.0363288	0.542372	-3.73067
1646	7	1	14	YBR106W	PHO88	-0.228746	10.7214	-2.61854	0.036337	0.542372	-3.7309
7304	27	15	8	YOR261C	RPN8	-0.293575	9.57668	-2.61705	0.0364137	0.542372	-3.73297
4525	17	11	13	YLR295C	ATP14	0.249749	8.04209	2.61504	0.036517	0.542372	-3.73575
11054	41	11	14	YLR319C	BUD6	0.252556	7.5708	2.61484	0.0365276	0.542372	-3.73603
5406	20	15	14	YOR105W	YOR105W	-0.23288	7.16672	-2.61382	0.03658	0.542372	-3.73744
7135	27	4	15	YDR370C	DXO1	-0.233361	7.8956	-2.61353	0.036595	0.542372	-3.73784
12674	47	11	2	YLR420W	URA4	-0.246862	10.385	-2.61264	0.0366409	0.542372	-3.73907
6392	24	9	8	YJL174W	KRE9	0.234752	10.086	2.61261	0.0366426	0.542372	-3.73912
9937	37	10	1	YLR030W	YLR030W	-0.361697	8.25946	-2.61217	0.0366653	0.542372	-3.73973
2409	9	15	9	YOR292C	YOR292C	0.233189	8.37235	2.61039	0.0367577	0.543123	-3.7422
5378	20	14	2	YNL309W	STB1	0.245017	6.61362	2.60791	0.0368865	0.54441	-3.74563
8488	32	4	8	YDR278C	YDR278C	-0.233882	6.34901	-2.60417	0.0370818	0.546588	-3.75081
11584	43	10	16	YKR060W	UTP30	-0.270156	10.4802	-2.60087	0.0372552	0.546588	-3.75539
4275	16	13	3	YMR294W	JNM1	0.259357	6.97464	2.60074	0.0372618	0.546588	-3.75556
4355	17	1	3	YBL101W-B	YBL101W-B	-0.299243	8.95631	-2.59795	0.0374091	0.546588	-3.75944
5765	22	4	5	YDR319C	YFT2	-0.235355	8.71177	-2.59792	0.0374105	0.546588	-3.75947
5791	22	5	15	YER023W	PRO3	-0.280153	9.32539	-2.59678	0.0374708	0.546588	-3.76105
9805	37	1	13	YBR139W	YBR139W	0.229182	8.2122	2.59651	0.0374854	0.546588	-3.76143
8485	32	4	5	YDR326C	YSP2	0.447913	8.63451	2.5961	0.037507	0.546588	-3.762
9162	34	12	10	YML034W	SRC1	0.268542	7.57196	2.59525	0.0375521	0.546588	-3.76318
6566	25	3	6	YDR040C	ENA1	-0.244205	10.0027	-2.59446	0.0375936	0.546588	-3.76426
6391	24	9	7	YJL174W	KRE9	0.244174	9.66573	2.5941	0.0376132	0.546588	-3.76477
7951	30	4	15	YDR275W	BSC2	-0.232467	8.52271	-2.59168	0.0377418	0.546588	-3.76812
10760	40	10	8	YKL185W	ASH1	0.256513	9.58928	2.59045	0.0378073	0.546588	-3.76982
7516	28	11	12	YLR065C	ENV10	-0.235398	9.53817	-2.5902	0.0378212	0.546588	-3.77018
9418	35	11	10	YLR312C	YLR312C	0.225825	6.53242	2.58946	0.0378605	0.546588	-3.7712
12673	47	11	1	YLR420W	URA4	-0.241575	10.1938	-2.58875	0.0378985	0.546588	-3.77218
9546	36	2	10	YBR235W	VHC1	-0.392626	8.2095	-2.58845	0.0379148	0.546588	-3.77261
5202	20	3	2	YDL090C	RAM1	0.274586	7.14118	2.58786	0.0379461	0.546588	-3.77341
10397	39	4	13	YDR522C	SPS2	0.252476	6.7932	2.58778	0.0379507	0.546588	-3.77353
4778	18	10	10	YKL120W	OAC1	-0.251839	8.50719	-2.5873	0.0379764	0.546588	-3.7742
2770	11	4	2	YDR408C	ADE8	-0.236793	8.32713	-2.5861	0.0380405	0.546588	-3.77585
3048	12	4	8	YDR167W	TAF10	-0.225503	8.81756	-2.58603	0.0380447	0.546588	-3.77596
8564	32	9	4	YJL184W	GON7	0.681931	8.3026	2.58588	0.0380525	0.546588	-3.77616
8602	32	11	10	YLR209C	PNP1	-0.238862	7.79874	-2.58407	0.0381501	0.546588	-3.77867
5369	20	13	9	YMR251W-A	HOR7	0.54669	11.2063	2.58388	0.0381601	0.546588	-3.77893
5241	20	5	9	YEL058W	PCM1	-0.239447	9.24003	-2.58342	0.0381852	0.546588	-3.77957
9219	34	16	3	YPL069C	BTS1	0.225247	8.22147	2.58301	0.0382071	0.546588	-3.78014
10249	38	12	9	YML124C	TUB3	0.225153	9.02958	2.58113	0.0383093	0.547449	-3.78276
688	3	9	16	YJR025C	BNA1	0.256389	9.17545	2.57905	0.0384218	0.548258	-3.78563
8104	30	14	8	YNR025C	YNR025C	-0.257418	7.69287	-2.5781	0.0384737	0.548258	-3.78695
9304	35	4	8	YDR382W	RPP2b	-0.244675	11.8355	-2.57711	0.0385276	0.548258	-3.78833
10803	40	13	3	YMR316C-A	YMR316C-A	-0.349313	7.20103	-2.57572	0.0386032	0.548258	-3.79025
11333	42	12	5	YML043C	RRN11	0.224556	7.50647	2.57509	0.038638	0.548258	-3.79113
9893	37	7	5	YHR107C	CDC12	0.224922	7.56465	2.57375	0.038711	0.548258	-3.79298
12919	48	9	7	YJL198W	PHO90	-0.22985	8.13536	-2.57375	0.0387113	0.548258	-3.79299
10200	38	9	8	YJL191W	RPS14b	0.352179	11.7837	2.57154	0.0388326	0.548258	-3.79605
8801	33	7	1	YHR016C	YSC84	0.247158	7.21436	2.57126	0.0388475	0.548258	-3.79643
11635	43	14	3	YOL060C	MAM3	0.224456	8.20546	2.56966	0.0389357	0.548258	-3.79866
34	1	3	2	YDR018C	YDR018C	0.226508	6.68507	2.56951	0.0389441	0.548258	-3.79887
9551	36	2	15	YBR185C	MBA1	0.346427	8.42287	2.56917	0.0389626	0.548258	-3.79933
3242	12	16	10	YPL088W	YPL088W	0.224363	8.27262	2.56854	0.0389974	0.548258	-3.80021
6268	24	1	12	YBL004W	UTP20	-0.224055	6.6538	-2.56714	0.0390748	0.548258	-3.80215
4114	16	3	2	YDL177C	YDL177C	-0.223944	7.80689	-2.56686	0.0390905	0.548258	-3.80254
1645	7	1	13	YBR106W	PHO88	-0.235352	10.8092	-2.56681	0.0390931	0.548258	-3.80261
12659	47	10	3	YLL056C	YLL056C	-0.241836	9.09885	-2.56627	0.0391228	0.548258	-3.80335
2728	11	1	8	YBL092W	RPL32	-0.247102	11.6036	-2.56558	0.0391612	0.548258	-3.80431
12543	47	2	15	YCR093W	CDC39	-0.248963	7.91648	-2.56553	0.0391643	0.548258	-3.80439
2073	8	11	9	YLR185W	RPL37a	-0.22664	11.4783	-2.56163	0.0393809	0.549128	-3.8098
4814	18	12	14	YML017W	PSP2	0.401212	7.83657	2.56077	0.0394289	0.549128	-3.81099
12361	46	8	9	YIL082W	YIL082W	-0.238206	8.09876	-2.56052	0.0394431	0.549128	-3.81134
7110	27	3	6	YDR039C	ENA2	-0.235025	8.94849	-2.55924	0.0395143	0.549128	-3.81311
1208	5	8	8	YIR010W	DSN1	0.285195	7.67294	2.55852	0.039555	0.549128	-3.81412
12790	48	1	6	YBL076C	ILS1	-0.223144	9.39186	-2.5584	0.0395615	0.549128	-3.81428
7026	26	15	2	YOR120W	GCY1	0.226656	7.65236	2.55825	0.0395701	0.549128	-3.81449
5963	22	16	11	YPL145C	KES1	0.223652	9.36913	2.55603	0.0396945	0.549128	-3.81756
10875	40	17	11	YPR185W	ATG13	0.223681	8.08327	2.55561	0.0397179	0.549128	-3.81814
8988	34	1	12	YAL035W	FUN12	-0.229273	9.13754	-2.55544	0.0397277	0.549128	-3.81838
2334	9	10	14	YKR077W	MSA2	-0.2863	6.44156	-2.55539	0.0397304	0.549128	-3.81845
9393	35	10	1	YKR106W	GEX2	0.804331	12.9205	2.55475	0.0397668	0.549128	-3.81935
3205	12	14	5	YNL299W	TRF5	0.395533	8.01615	2.55462	0.0397736	0.549128	-3.81951
1214	5	8	14	YJL010C	NOP9	0.240655	8.09589	2.5524	0.0398992	0.549508	-3.8226
6016	23	2	16	YCR068W	ATG15	0.229342	7.4744	2.55141	0.039955	0.549508	-3.82397
7307	27	15	11	YOR259C	RPT4	0.227972	10.3805	2.5514	0.0399556	0.549508	-3.82398
4826	18	13	10	YMR252C	YMR252C	0.248245	8.20328	2.55115	0.0399696	0.549508	-3.82433
5102	19	13	14	YNL111C	CYB5	0.22377	10.1354	2.54856	0.0401169	0.550953	-3.82793
8031	30	9	15	YJL179W	PFD1	-0.258271	8.14848	-2.5466	0.0402287	0.551309	-3.83066
7785	29	11	9	YLR401C	DUS3	0.246901	7.52947	2.54614	0.0402544	0.551309	-3.83128
6428	24	11	12	YLR153C	ACS2	-0.229231	9.78075	-2.54529	0.0403035	0.551309	-3.83247
4115	16	3	3	YDL130W	RPP1b	-0.233488	11.3101	-2.54514	0.0403118	0.551309	-3.83268
6922	26	8	10	YHR191C	CTF8	-0.279362	7.92908	-2.54428	0.0403612	0.551406	-3.83388
6448	24	12	16	YML061C	PIF1	-0.235012	7.48137	-2.54279	0.040446	0.551855	-3.83593
11155	42	1	3	YAL046C	AIM1	-0.255394	7.73082	-2.54149	0.040521	0.551855	-3.83774
9114	34	9	10	YJL141C	YAK1	0.257005	8.23296	2.53919	0.0406533	0.551855	-3.84093
10339	39	1	3	YBR096W	YBR096W	-0.22336	9.80708	-2.53773	0.0407374	0.551855	-3.84296
11184	42	2	16	YBR194W	AIM4	-0.246095	6.9231	-2.53706	0.0407764	0.551855	-3.84389
8718	33	1	14	YBR045C	GIP1	0.235395	6.61896	2.53701	0.0407794	0.551855	-3.84397
9356	35	7	12	YHL014C	YLF2	-0.354192	7.09472	-2.64568	0.0408507	0.551855	-3.55406
12977	48	13	1	YNL044W	YIP3	0.255678	10.636	2.53565	0.0408577	0.551855	-3.84584
9897	37	7	9	YHR105W	YPT35	0.303665	6.76934	2.53538	0.0408737	0.551855	-3.84623
5722	22	1	10	YBL051C	PIN4	0.242252	8.58087	2.53507	0.0408918	0.551855	-3.84666
12222	45	16	14	YPR124W	CTR1	0.240754	9.1456	2.53501	0.0408952	0.551855	-3.84674
11853	44	10	13	YKL141W	SDH3	-0.25339	9.8105	-2.53425	0.040939	0.551855	-3.84779
6052	23	5	4	YFL020C	PAU5	-0.280483	7.94685	-2.53417	0.040944	0.551855	-3.84791
2119	8	14	7	YNL339C	YRF1-6	0.246936	8.82628	2.53184	0.0410795	0.552632	-3.85114
10693	40	6	5	YGL143C	MRF1	0.222336	7.83749	2.53172	0.0410863	0.552632	-3.8513
9049	34	5	9	YEL074W	YEL074W	-0.221532	9.64221	-2.52841	0.0412799	0.554272	-3.8559
11169	42	2	1	YBR248C	HIS7	0.247117	9.04019	2.52818	0.0412932	0.554272	-3.85622
11266	42	8	2	YHR211W	FLO5	-0.313499	7.71353	-2.52624	0.0414071	0.55523	-3.85891
6352	24	6	16	YGL075C	MPS2	-0.242797	7.22535	-2.52514	0.0414719	0.555528	-3.86044
10357	39	2	5	YDL008W	APC11	-0.22364	7.73446	-2.524	0.041539	0.555855	-3.86202
2049	8	10	1	YKL203C	TOR2	0.230551	8.51783	2.52208	0.0416522	0.556544	-3.86468
7136	27	4	16	YDR370C	DXO1	-0.246121	7.97685	-2.52155	0.0416837	0.556544	-3.86542
7798	29	12	6	YMR169C	ALD3	0.27404	7.99253	2.52096	0.0417184	0.556544	-3.86624
11550	43	8	14	YIL174W	YIL174W	-0.219892	6.53969	-2.52011	0.041769	0.55665	-3.86742
6567	25	3	7	YDL240W	LRG1	-0.22445	7.72928	-2.51872	0.0418511	0.556731	-3.86934
2469	10	2	5	YBR214W	SDS24	-0.290361	8.96402	-2.51441	0.0421083	0.556731	-3.87534
12517	47	1	5	YBR150C	TBS1	-0.2464	7.70897	-2.51349	0.0421632	0.556731	-3.87661
12024	45	4	8	YDR487C	RIB3	-0.220398	9.75656	-2.51276	0.0422073	0.556731	-3.87763
8654	32	14	14	YNR068C	YNR068C	0.237936	7.32527	2.51236	0.0422312	0.556731	-3.87819
9321	35	5	9	YER177W	BMH1	0.299324	11.5938	2.51169	0.0422713	0.556731	-3.87911
12397	46	10	13	YKR013W	PRY2	0.220562	10.4801	2.51066	0.0423331	0.556731	-3.88054
1854	7	14	14	YOL159C	YOL159C	0.226305	8.45442	2.50855	0.0424602	0.556731	-3.88347
2754	11	3	2	YDR025W	RPS11a	-0.218731	11.5317	-2.50827	0.0424774	0.556731	-3.88387
6410	24	10	10	YKL215C	OXP1	0.277675	8.00819	2.50751	0.0425227	0.556731	-3.88491
8555	32	8	11	YIL016W	SNL1	-0.218792	7.64111	-2.50723	0.0425396	0.556731	-3.8853
6051	23	5	3	YFL020C	PAU5	-0.240211	7.92801	-2.50723	0.0425402	0.556731	-3.88531
6491	24	15	11	YOR155C	ISN1	0.235896	8.36891	2.50673	0.04257	0.556731	-3.886
4977	19	6	1	YGL225W	VRG4	-0.222812	10.6488	-2.50655	0.0425813	0.556731	-3.88625
11337	42	12	9	YML041C	VPS71	0.222411	7.90149	2.50616	0.0426045	0.556731	-3.88679
6022	23	3	6	YDR127W	ARO1	-0.21916	8.57855	-2.50568	0.0426335	0.556731	-3.88745
8615	32	12	7	YML073C	RPL6a	-0.313633	11.2534	-2.50549	0.042645	0.556731	-3.88772
4387	17	3	3	YDL234C	GYP7	0.226351	8.2357	2.50546	0.0426468	0.556731	-3.88776
11583	43	10	15	YKR060W	UTP30	-0.293943	10.2988	-2.50445	0.0427085	0.556731	-3.88917
8543	32	7	15	YGR204W	ADE3	-0.24072	9.28752	-2.50288	0.0428034	0.556731	-3.89134
9565	36	3	13	YDL100C	GET3	-0.264547	10.1864	-2.5027	0.0428149	0.556731	-3.8916
9643	36	8	11	YHR150W	PEX28	0.222304	7.88917	2.50264	0.0428185	0.556731	-3.89168
12258	46	2	2	YCL043C	PDI1	-0.222613	11.0758	-2.50215	0.0428478	0.556731	-3.89235
10613	40	1	5	YBL068W	PRS4	0.227798	9.20409	2.5021	0.0428508	0.556731	-3.89242
12991	48	13	15	YMR316W	DIA1	-0.221067	9.23644	-2.50199	0.0428581	0.556731	-3.89259
7983	30	6	15	YGL084C	GUP1	-0.248986	11.3411	-2.50155	0.0428845	0.556731	-3.89319
8648	32	14	8	YNR024W	MPP6	0.260501	7.98901	2.49772	0.043119	0.559052	-3.89852
5421	20	16	13	YPL094C	SEC62	0.252767	10.9157	2.49588	0.0432319	0.559052	-3.90107
6478	24	14	14	YNR060W	FRE4	-0.268549	7.87169	-2.49559	0.0432492	0.559052	-3.90146
9001	34	2	9	YBR236C	ABD1	-0.223585	8.29866	-2.49552	0.0432539	0.559052	-3.90157
9220	34	16	4	YPL069C	BTS1	0.219685	7.98311	2.49443	0.0433208	0.559052	-3.90308
5330	20	11	2	YLR109W	AHP1	0.300645	11.9285	2.49247	0.0434418	0.559052	-3.9058
7420	28	5	12	YEL018W	EAF5	-0.261037	7.98293	-2.49245	0.0434428	0.559052	-3.90583
2447	9	17	15	YPR172W	YPR172W	0.232728	8.98405	2.49195	0.0434736	0.559052	-3.90652
4749	18	8	13	YHR181W	SVP26	-0.218348	8.32704	-2.4909	0.0435386	0.559052	-3.90798
11165	42	1	13	YAR035W	YAT1	-0.218065	8.19687	-2.49046	0.0435664	0.559052	-3.9086
1664	7	2	16	YCR052W	RSC6	0.221392	8.43734	2.49044	0.0435671	0.559052	-3.90862
11026	41	10	2	YLL009C	COX17	-0.242007	8.08973	-2.49028	0.0435775	0.559052	-3.90885
10863	40	16	15	YPL158C	AIM44	0.260212	8.51858	2.48868	0.0436768	0.559133	-3.91107
8065	30	12	1	YML120C	NDI1	0.222878	8.15849	2.488	0.0437187	0.559133	-3.91201
13006	48	14	14	YOL007C	CSI2	0.21971	9.04133	2.48621	0.04383	0.559133	-3.91449
6087	23	7	7	YHR044C	DOG1	-0.216857	8.87015	-2.48617	0.043833	0.559133	-3.91456
7113	27	3	9	YDR037W	KRS1	0.24849	10.6457	2.48589	0.0438501	0.559133	-3.91494
10750	40	9	14	YJR010C-A	SPC1	-0.281441	8.99172	-2.48536	0.0438834	0.559133	-3.91568
1653	7	2	5	YCR104W	PAU3	-0.245663	7.10102	-2.48535	0.0438838	0.559133	-3.91569
10407	39	5	7	YFL034W	YFL034W	-0.216571	9.04737	-2.48358	0.0439947	0.559999	-3.91815
11238	42	6	6	YGL056C	SDS23	0.247386	8.75282	2.48134	0.0441349	0.561236	-3.92126
12892	48	7	12	YGR222W	PET54	-0.218537	8.27532	-2.48011	0.0442124	0.561674	-3.92297
8676	32	16	4	YPL156C	PRM4	-0.263219	8.66089	-2.47906	0.0442785	0.561966	-3.92443
2786	11	5	2	YER157W	COG3	-0.219184	7.92241	-2.4777	0.0443644	0.561987	-3.92632
2264	9	6	8	YGL168W	HUR1	-0.230415	8.95614	-2.47767	0.0443663	0.561987	-3.92637
10259	38	13	3	YMR316C-B	YMR316C-B	-0.223223	7.07222	-2.47689	0.0444156	0.562066	-3.92745
9516	35	17	12	YPR177C	YPR177C	0.446119	6.77599	2.4755	0.0445033	0.562261	-3.92938
12909	48	8	13	YIL078W	THS1	-0.245095	10.6977	-2.47528	0.0445172	0.562261	-3.92968
12789	48	1	5	YBL076C	ILS1	-0.215817	9.37863	-2.47428	0.0445805	0.56236	-3.93107
8557	32	8	13	YIL062C	ARC15	-0.220562	9.48534	-2.47318	0.0446508	0.56236	-3.93261
3611	14	5	11	YER018C	SPC25	-0.235191	7.60058	-2.47222	0.0447117	0.56236	-3.93394
6708	25	12	4	YMR034C	YMR034C	-0.223188	7.57993	-2.47072	0.0448072	0.56236	-3.93602
11260	42	7	12	YGR127W	YGR127W	0.229158	7.18829	2.47019	0.0448409	0.56236	-3.93675
9598	36	5	14	YEL071W	DLD3	-0.27924	10.6288	-2.46997	0.0448553	0.56236	-3.93706
12535	47	2	7	YCR097WA	YCR097WA	-0.217329	6.88139	-2.46919	0.044905	0.56236	-3.93814
13021	48	15	13	YOR225W	YOR225W	-0.256507	6.86981	-2.46881	0.0449294	0.56236	-3.93868
3005	12	1	13	YAL058C-A	YAL058C-A	-0.232013	6.97448	-2.46796	0.0449837	0.56236	-3.93985
9394	35	10	2	YKR106W	GEX2	0.551356	13.1448	2.46702	0.0450435	0.56236	-3.94115
13005	48	14	13	YOL007C	CSI2	0.216795	8.95745	2.46602	0.0451079	0.56236	-3.94254
3459	13	13	3	YNL158W	PGA1	0.232113	7.57812	2.4659	0.0451159	0.56236	-3.94272
11020	41	9	12	YJR068W	RFC2	0.215881	7.90845	2.4658	0.0451219	0.56236	-3.94285
4866	18	16	2	YPL101W	ELP4	0.218906	8.54725	2.4657	0.0451285	0.56236	-3.94299
7173	27	7	5	YHR005C	GPA1	0.227365	8.92707	2.46456	0.0452018	0.562596	-3.94457
11634	43	14	2	YOL109W	ZEO1	0.220466	11.0581	2.46407	0.0452337	0.562596	-3.94526
3321	13	4	9	YDR501W	PLM2	0.244683	6.68254	2.46317	0.0452913	0.562776	-3.9465
635	3	6	11	YGL157W	ARI1	-0.230835	9.0539	-2.46052	0.0454628	0.564112	-3.95019
6257	24	1	1	YBL054W	TOD6	0.286098	8.03313	2.45943	0.0455334	0.564112	-3.9517
9339	35	6	11	YGL189C	RPS26a	-0.235751	11.0367	-2.45873	0.0455785	0.564112	-3.95267
5232	20	4	16	YDR171W	HSP42	0.415129	8.17392	2.45713	0.0456828	0.564112	-3.9549
5182	20	1	14	YAL065C	YAL065C	-0.25575	7.70454	-2.45692	0.0456967	0.564112	-3.95519
7588	28	16	4	YPL060W	MFM1	0.2191	8.43605	2.4555	0.0457888	0.564112	-3.95716
11656	43	15	8	YOR277C	YOR277C	-0.214116	8.32989	-2.45545	0.0457925	0.564112	-3.95724
4728	18	7	8	YGR105W	VMA21	-0.215783	8.07469	-2.45535	0.0457988	0.564112	-3.95737
146	1	10	2	YKR075C	YKR075C	-0.214114	7.35964	-2.455	0.0458215	0.564112	-3.95785
12006	45	3	6	YDR152W	GIR2	-0.250172	9.08955	-2.45346	0.045922	0.564112	-3.95999
8536	32	7	8	YGR208W	SER2	-0.37319	8.41032	-2.45316	0.0459422	0.564112	-3.96042
11908	44	14	4	YNL285W	YNL285W	-0.261465	7.41333	-2.45308	0.0459472	0.564112	-3.96053
4017	15	14	1	YOR007C	SGT2	0.235618	11.0245	2.45267	0.0459741	0.564112	-3.96109
4795	18	11	11	YLR058C	SHM2	-0.225572	9.84442	-2.45221	0.0460041	0.564112	-3.96173
2769	11	4	1	YDR408C	ADE8	-0.23134	8.50418	-2.45026	0.0461325	0.564215	-3.96445
12893	48	7	13	YGR268C	HUA1	-0.21953	7.90214	-2.45019	0.0461369	0.564215	-3.96454
11245	42	6	13	YGL052W	YGL052W	-0.249115	6.82199	-2.44997	0.0461514	0.564215	-3.96485
5777	22	5	1	YER073W	ALD5	-0.22574	9.91618	-2.44945	0.0461855	0.564215	-3.96557
9815	37	2	7	YCR090C	YCR090C	-0.253032	8.06377	-2.44875	0.0462314	0.564248	-3.96654
4241	16	11	1	YLR197W	NOP56	0.365261	9.31697	2.44709	0.0463412	0.565059	-3.96885
1875	7	16	3	YPR041W	TIF5	0.21364	8.93629	2.44411	0.0465386	0.56642	-3.97299
5212	20	3	12	YDL038C	YDL038C	0.340634	8.201	2.54441	0.0465632	0.56642	-3.67673
5874	22	11	2	YLR206W	ENT2	0.213973	9.09418	2.44314	0.0466027	0.56642	-3.97433
12700	47	12	12	YMR136W	GAT2	0.213296	7.63919	2.44278	0.0466264	0.56642	-3.97483
4295	16	14	7	YNR008W	LRO1	0.229048	7.63741	2.44186	0.0466877	0.566537	-3.97611
5611	21	11	11	YLR345W	YLR345W	0.220329	8.0681	2.44117	0.0467341	0.566537	-3.97708
10133	38	5	5	YER087C-A	YER087C-A	-0.233096	9.2601	-2.43888	0.0468866	0.566537	-3.98025
7439	28	6	15	YFR044C	DUG1	-0.344005	9.48635	-2.43869	0.0468997	0.566537	-3.98052
5196	20	2	12	YBR171W	SEC66	-0.222892	8.85684	-2.43849	0.0469128	0.566537	-3.98079
10828	40	14	12	YNR030W	ALG12	0.213109	9.12597	2.43827	0.0469274	0.566537	-3.9811
11	1	1	11	YBL083C	YBL083C	-0.212829	7.74174	-2.43756	0.046975	0.566537	-3.98209
667	3	8	11	YIL088C	AVT7	0.227547	8.6976	2.43744	0.0469834	0.566537	-3.98226
2694	10	16	6	YPL091W	GLR1	0.213215	8.29211	2.43619	0.0470672	0.567023	-3.984
2735	11	1	15	YBL088C	TEL1	-0.215108	7.21427	-2.43464	0.0471708	0.567747	-3.98614
2083	8	12	3	YML052W	SUR7	0.260271	10.3617	2.43274	0.0472994	0.568557	-3.98879
8750	33	3	14	YDR044W	HEM13	-0.23996	9.3848	-2.43235	0.0473253	0.568557	-3.98932
4541	17	12	13	YMR067C	UBX4	0.216015	7.56828	2.4265	0.047722	0.571364	-3.99745
3584	14	3	16	YDL125C	HNT1	-0.219021	10.2856	-2.42642	0.0477273	0.571364	-3.99756
1398	6	3	6	YDL168W	SFA1	-0.214394	8.15059	-2.4263	0.0477355	0.571364	-3.99773
10775	40	11	7	YLR171W	YLR171W	-0.235782	7.10248	-2.42483	0.0478357	0.571364	-3.99977
12283	46	3	11	YDL158C	YDL158C	-0.234296	7.47713	-2.42332	0.0479395	0.571364	-4.00188
5199	20	2	15	YBR169C	SSE2	0.306289	8.01944	2.42252	0.0479939	0.571364	-4.00298
1534	6	11	14	YLR184W	YLR184W	-0.658575	6.69393	-2.42221	0.048015	0.571364	-4.00341
7718	29	7	6	YHR099W	TRA1	-0.218774	6.12157	-2.42083	0.0481096	0.571364	-4.00533
4220	16	9	12	YJL164C	TPK1	0.289983	8.63	2.42025	0.0481496	0.571364	-4.00614
4228	16	10	4	YKL163W	PIR3	0.21115	10.494	2.41985	0.048177	0.571364	-4.00669
10531	39	13	3	YNL181W	YNL181W	0.213556	8.02043	2.41935	0.0482113	0.571364	-4.00738
11628	43	13	12	YNL089C	YNL089C	-0.219945	7.6584	-2.41807	0.0482996	0.571364	-4.00917
5766	22	4	6	YDR319C	YFT2	-0.212558	8.78131	-2.41792	0.0483104	0.571364	-4.00938
7123	27	4	3	YDR376W	ARH1	0.210913	8.06485	2.41761	0.0483317	0.571364	-4.00981
6486	24	15	6	YOR205C	GEP3	0.211503	7.40049	2.41683	0.0483851	0.571364	-4.01089
9556	36	3	4	YDL058W	USO1	-0.213131	7.37563	-2.41628	0.0484232	0.571364	-4.01165
6921	26	8	9	YHR191C	CTF8	-0.259592	7.92558	-2.41553	0.0484749	0.571364	-4.01269
7488	28	9	16	YJL082W	IML2	-0.290421	7.51081	-2.41346	0.0486186	0.571364	-4.01557
10515	39	12	3	YMR133W	REC114	0.212831	6.46376	2.41328	0.0486315	0.571364	-4.01583
5409	20	16	1	YPL100W	ATG21	0.237179	8.10518	2.41194	0.0487242	0.571364	-4.01768
12458	46	14	10	YOL010W	RCL1	0.213941	9.50855	2.4118	0.0487342	0.571364	-4.01788
3283	13	2	3	YCR067C	SED4	-0.232469	6.82077	-2.41005	0.0488563	0.571364	-4.02032
5792	22	5	16	YER023W	PRO3	-0.233494	9.15613	-2.40993	0.0488646	0.571364	-4.02048
1724	7	6	12	YGL253W	HXK2	-0.211181	11.2756	-2.40941	0.0489008	0.571364	-4.0212
10951	41	5	7	YER140W	EMP65	0.251441	7.87174	2.40921	0.0489143	0.571364	-4.02147
9631	36	7	15	YGR116W	SPT6	-0.222596	6.52403	-2.40912	0.0489208	0.571364	-4.0216
9816	37	2	8	YCR090C	YCR090C	-0.235744	8.06998	-2.40894	0.0489334	0.571364	-4.02185
5551	21	7	15	YHR041C	SRB2	-0.213933	7.81877	-2.40887	0.0489384	0.571364	-4.02195
9590	36	5	6	YEL075C	YEL075C	-0.251133	8.60794	-2.40873	0.0489479	0.571364	-4.02214
5436	20	17	12	YPR197C	YPR197C	-0.216558	7.34899	-2.40856	0.0489603	0.571364	-4.02238
11304	42	10	8	YKL098W	MTC2	0.209944	7.62462	2.40659	0.0490979	0.572457	-4.02511
4171	16	6	11	YGL069C	YGL069C	-0.209708	8.38622	-2.40449	0.0492458	0.57311	-4.02804
3238	12	16	6	YPL090C	RPS6a	0.21468	13.0622	2.40414	0.0492702	0.57311	-4.02852
4259	16	12	3	YML059C	NTE1	0.321289	7.96511	2.40226	0.0494028	0.57311	-4.03114
12299	46	4	11	YDR293C	SSD1	-0.209579	9.35515	-2.40198	0.0494223	0.57311	-4.03152
1039	4	14	15	YNL239W	LAP3	0.212759	9.75015	2.40161	0.0494486	0.57311	-4.03204
10773	40	11	5	YLR219W	MSC3	0.209726	8.45722	2.40161	0.0494489	0.57311	-4.03204
3864	15	4	8	YDR454C	GUK1	-0.21212	9.10105	-2.40106	0.0494873	0.57311	-4.0328
12221	45	16	13	YPR124W	CTR1	0.209466	8.84443	2.40035	0.049538	0.57311	-4.03379
6570	25	3	10	YDR038C	ENA5	-0.227662	9.52769	-2.40019	0.0495492	0.57311	-4.03401
6463	24	13	15	YMR295C	YMR295C	0.363876	9.58144	2.39891	0.0496399	0.573457	-4.03579
7121	27	4	1	YDR424C	DYN2	-0.232706	8.00393	-2.39852	0.0496671	0.573457	-4.03633
12054	45	6	6	YGR081C	SLX9	-0.213043	8.19639	-2.39772	0.049724	0.573606	-4.03744
1602	6	16	2	YPL181W	CTI6	0.22592	8.07253	2.39698	0.0497768	0.573708	-4.03847
9827	37	3	3	YDR098C	GRX3	-0.223413	8.94116	-2.39503	0.0499156	0.574568	-4.04118
919	4	7	7	YGR088W	CTT1	0.213662	7.17562	2.3947	0.0499394	0.574568	-4.04164
9983	37	12	15	YMR128W	ECM16	-0.213834	8.10883	-2.39079	0.0502194	0.576946	-4.04707
8066	30	12	2	YML120C	NDI1	0.216219	8.03468	2.39057	0.0502346	0.576946	-4.04737
8573	32	9	13	YJR002W	MPP10	0.208443	8.48786	2.38824	0.0504022	0.577128	-4.05061
6594	25	5	2	YER174C	GRX4	-0.213641	8.16048	-2.38813	0.0504105	0.577128	-4.05077
6093	23	7	13	YHR086W	NAM8	0.270746	8.11913	2.3879	0.0504269	0.577128	-4.05108
4796	18	11	12	YLR058C	SHM2	-0.240867	10.052	-2.38704	0.0504888	0.577128	-4.05227
9908	37	8	4	YIR044C	YIR044C	-0.379072	7.14795	-2.38684	0.0505037	0.577128	-4.05256
12518	47	1	6	YBR150C	TBS1	-0.23431	7.75251	-2.38554	0.0505977	0.577128	-4.05437
9695	36	11	15	YLR071C	RGR1	-0.218044	7.32958	-2.38522	0.0506208	0.577128	-4.05481
4320	16	15	16	YOR145C	PNO1	0.214352	10.325	2.38499	0.0506371	0.577128	-4.05512
12907	48	8	11	YIL032C	YIL032C	-0.301553	6.52976	-2.38434	0.0506842	0.577128	-4.05603
6732	25	13	12	YNL074C	MLF3	0.222625	8.50516	2.38422	0.0506928	0.577128	-4.05619
3304	13	3	8	YDR072C	IPT1	-0.26205	9.33971	-2.38203	0.0508523	0.578439	-4.05924
3994	15	12	10	YMR152W	YIM1	0.228695	8.65594	2.38136	0.0509005	0.578483	-4.06016
12615	47	7	7	YHR067W	HTD2	-1.24984	8.1458	-2.38064	0.050953	0.578576	-4.06117
5213	20	3	13	YDL084W	SUB2	-0.300525	10.4814	-2.37998	0.051001	0.578617	-4.06208
4036	15	15	4	YOR342C	YOR342C	0.219061	8.28028	2.37846	0.0511124	0.578737	-4.0642
2081	8	12	1	YML098W	TAF13	0.235088	8.71322	2.37712	0.0512101	0.578737	-4.06605
11817	44	8	9	YHR206W	SKN7	0.207952	8.58307	2.377	0.0512193	0.578737	-4.06623
12033	45	5	1	YFR021W	ATG18	0.213025	7.32551	2.37698	0.0512203	0.578737	-4.06625
1520	6	10	16	YKL150W	MCR1	0.312036	9.03223	2.37641	0.0512626	0.578737	-4.06705
3682	14	10	2	YKL212W	SAC1	0.212964	7.58739	2.3762	0.0512777	0.578737	-4.06734
1273	5	12	9	YMR145C	NDE1	0.209829	7.85509	2.37527	0.0513459	0.578956	-4.06863
10134	38	5	6	YER087C-A	YER087C-A	-0.221508	8.92744	-2.37473	0.0513858	0.578956	-4.06938
7671	29	4	7	YDR471W	RPL27b	-0.228843	11.3502	-2.37361	0.051468	0.579382	-4.07093
9403	35	10	11	YKR054C	DYN1	-0.207318	10.0038	-2.3722	0.051572	0.579455	-4.07289
10986	41	7	10	YHR020W	YHR020W	-0.232493	9.41709	-2.372	0.0515866	0.579455	-4.07317
3497	13	15	9	YOR387C	YOR387C	-0.602306	6.96419	-2.37171	0.0516078	0.579455	-4.07357
10219	38	10	11	YKL184W	SPE1	0.220503	9.11846	2.37021	0.051719	0.57962	-4.07566
7468	28	8	12	YHR143W	DSE2	0.21037	11.0063	2.36844	0.0518502	0.57962	-4.07812
12297	46	4	9	YDR341C	YDR341C	-0.283265	9.39984	-2.36826	0.0518636	0.57962	-4.07837
7020	26	14	12	YNL266W	YNL266W	-0.213618	6.80819	-2.36781	0.0518966	0.57962	-4.07899
9306	35	4	10	YDR428C	BNA7	-0.207114	7.90691	-2.36756	0.0519155	0.57962	-4.07934
2255	9	5	15	YER105C	NUP157	-0.224602	8.80656	-2.36703	0.0519546	0.57962	-4.08007
5964	22	16	12	YPL145C	KES1	0.209869	9.30232	2.36647	0.0519968	0.57962	-4.08086
12793	48	1	9	YBL074C	AAR2	0.243112	7.168	2.36593	0.0520364	0.57962	-4.0816
2247	9	5	7	YER109C	FLO8	-0.304895	7.36031	-2.36397	0.0521832	0.57962	-4.08433
9531	36	1	11	YAL035C-A	YAL035C-A	-0.209686	6.22179	-2.36324	0.0522373	0.57962	-4.08534
9873	37	6	1	YGR075C	PRP38	-0.252271	7.8311	-2.36264	0.0522825	0.57962	-4.08617
1900	7	17	12	YPR157W	TDA6	0.24736	7.1943	2.36204	0.0523273	0.57962	-4.08701
4219	16	9	11	YJL164C	TPK1	0.295464	8.80118	2.36156	0.0523629	0.57962	-4.08767
8745	33	3	9	YDR046C	BAP3	0.255807	8.59732	2.36082	0.052419	0.57962	-4.08871
2448	9	17	16	YPR172W	YPR172W	0.231254	8.94995	2.36011	0.0524721	0.57962	-4.08969
4771	18	10	3	YKL077W	YKL077W	0.221499	9.84075	2.35995	0.052484	0.57962	-4.08991
3016	12	2	8	YBR165W	UBS1	-0.208128	8.43064	-2.3599	0.0524881	0.57962	-4.08998
4569	17	14	9	YOL082W	ATG19	0.222219	8.05469	2.35983	0.0524931	0.57962	-4.09008
4113	16	3	1	YDL177C	YDL177C	-0.212189	8.03454	-2.35902	0.0525542	0.57962	-4.09121
10560	39	14	16	YOL143C	RIB4	0.235349	10.8766	2.35895	0.0525594	0.57962	-4.0913
11426	43	1	2	YBR058C	UBP14	-0.217351	6.86979	-2.35712	0.0526971	0.57962	-4.09384
12257	46	2	1	YCL043C	PDI1	-0.206389	11.0553	-2.3566	0.0527365	0.57962	-4.09456
11904	44	13	16	YMR225C	MRPL44	-0.255896	10.014	-2.35542	0.0528257	0.57962	-4.0962
1017	4	13	9	YMR235C	RNA1	0.209837	8.66675	2.35421	0.0529171	0.57962	-4.09788
2767	11	3	15	YDL219W	DTD1	-0.261856	8.50089	-2.35395	0.0529368	0.57962	-4.09824
9440	35	12	16	YMR035W	IMP2	-0.218429	8.06823	-2.35336	0.0529813	0.57962	-4.09906
11339	42	12	11	YLR465C	YLR465C	-0.22453	7.73606	-2.35254	0.0530436	0.57962	-4.1002
10991	41	7	15	YHL021C	AIM17	0.250528	8.17722	2.35206	0.0530803	0.57962	-4.10087
469	2	13	5	YMR238W	DFG5	0.20582	9.21457	2.35183	0.0530976	0.57962	-4.10118
1849	7	14	9	YOL161C	PAU20	-0.235123	8.61284	-2.3514	0.0531304	0.57962	-4.10178
12147	45	12	3	YMR141C	YMR141C	-0.218453	7.88196	-2.35066	0.0531865	0.57962	-4.10281
11938	44	16	2	YPL124W	SPC29	0.229252	7.46476	2.34971	0.0532592	0.57962	-4.10413
2153	8	16	9	YPL176C	TRE1	-0.261029	8.1537	-2.34843	0.0533564	0.57962	-4.1059
12868	48	6	4	YGL105W	ARC1	-0.254348	9.69424	-2.34802	0.0533885	0.57962	-4.10648
9770	36	16	10	YPL112C	PEX25	0.285887	8.78517	2.34788	0.0533991	0.57962	-4.10667
10686	40	5	14	YER082C	UTP7	0.219257	8.74586	2.34656	0.0534996	0.57962	-4.1085
11187	42	3	3	YDL067C	COX9	-0.23786	7.95846	-2.34653	0.0535022	0.57962	-4.10854
11091	41	14	3	YOL061W	PRS5	-0.236235	9.63449	-2.34616	0.0535302	0.57962	-4.10905
3057	12	5	1	YEL054C	RPL12a	-0.204932	12.3199	-2.34615	0.0535314	0.57962	-4.10907
12481	46	16	1	YPL221W	FLC1	-0.221616	9.90154	-2.34613	0.0535328	0.57962	-4.1091
11268	42	8	4	YHR163W	SOL3	-0.30431	8.17898	-2.34537	0.0535913	0.579773	-4.11016
306	2	3	2	YDL075W	RPL31a	-0.220444	10.661	-2.34386	0.0537072	0.580303	-4.11225
6292	24	3	4	YDL137W	ARF2	-0.205516	10.7461	-2.34357	0.0537293	0.580303	-4.11265
6512	24	16	16	YPL142C	YPL142C	0.232517	6.63643	2.34298	0.0537746	0.580312	-4.11347
12070	45	7	6	YHR115C	DMA1	0.206664	8.38012	2.33981	0.0540198	0.582476	-4.11788
6803	26	1	3	YAL033W	POP5	-0.213953	7.74902	-2.33908	0.0540759	0.582599	-4.11888
6189	23	13	13	YNL207W	RIO2	0.206801	8.72369	2.33697	0.0542402	0.583499	-4.12182
548	3	1	4	YBL086C	YBL086C	-0.204515	10.3145	-2.33685	0.0542488	0.583499	-4.12198
9062	34	6	6	YGL048C	RPT6	0.208749	8.49332	2.33618	0.0543011	0.58358	-4.12291
7820	29	13	12	YNL170W	YNL170W	-0.271467	8.07029	-2.33469	0.0544171	0.584043	-4.12498
8435	32	1	3	YBL014C	RRN6	0.20418	7.94079	2.33448	0.0544337	0.584043	-4.12527
1690	7	4	10	YDR492W	IZH1	-0.209031	9.0585	-2.33322	0.0545318	0.584615	-4.12702
356	2	6	4	YFR028C	CDC14	0.227892	8.49024	2.33013	0.0547744	0.585765	-4.13132
11697	44	1	1	YAR044W	OSH1	0.230269	8.05435	2.32993	0.0547896	0.585765	-4.13159
7966	30	5	14	YER075C	PTP3	-0.203123	8.72562	-2.32937	0.0548336	0.585765	-4.13236
11203	42	4	3	YDR201W	SPC19	-0.20461	7.56755	-2.32845	0.0549059	0.585765	-4.13364
11942	44	16	6	YPL122C	TFB2	0.240965	7.95386	2.32842	0.0549085	0.585765	-4.13369
6453	24	13	5	YNL018C	YNL018C	0.202949	6.54608	2.32659	0.0550525	0.586445	-4.13622
8749	33	3	13	YDR044W	HEM13	-0.243409	9.62602	-2.32596	0.055102	0.586445	-4.13709
6783	25	16	15	YPL247C	YPL247C	0.203064	7.11885	2.32504	0.0551755	0.586445	-4.13838
7474	28	9	2	YJL136C	RPS21b	-0.216002	10.8922	-2.32489	0.0551871	0.586445	-4.13859
11499	43	5	11	YER137C	YER137C	-0.209804	6.89918	-2.32422	0.05524	0.586445	-4.13952
5691	21	16	11	YPR054W	SMK1	0.229225	7.15282	2.3242	0.0552419	0.586445	-4.13955
344	2	5	8	YDR543C	YDR543C	-0.205516	7.13741	-2.32112	0.0554864	0.587503	-4.14382
8403	31	16	3	YPR065W	ROX1	0.224107	8.19218	2.32093	0.0555008	0.587503	-4.14408
6598	25	5	6	YER172C	BRR2	-0.228029	8.74072	-2.32079	0.0555124	0.587503	-4.14428
11906	44	14	2	YNL333W	SNZ2	0.251968	8.42316	2.32067	0.0555217	0.587503	-4.14444
3744	14	13	16	YMR290C	HAS1	0.206271	8.26399	2.31958	0.0556084	0.587944	-4.14595
8989	34	1	13	YAR020C	PAU7	-0.215236	6.79796	-2.31808	0.0557281	0.588535	-4.14803
12739	47	15	3	YOR374W	ALD4	0.394072	8.5337	2.31714	0.0558035	0.588535	-4.14934
10087	38	2	7	YBR286W	APE3	0.214791	10.2632	2.31702	0.0558128	0.588535	-4.1495
6502	24	16	6	YPL194W	DDC1	0.20972	7.2627	2.31614	0.0558835	0.588535	-4.15073
9951	37	10	15	YLL043W	FPS1	-0.217387	9.45224	-2.31606	0.0558899	0.588535	-4.15084
10225	38	11	1	YLR222C	UTP13	0.251002	8.603	2.31536	0.055946	0.588651	-4.15181
12457	46	14	9	YOL010W	RCL1	0.202107	9.17297	2.31465	0.0560032	0.588778	-4.1528
11655	43	15	7	YOR277C	YOR277C	-0.203286	8.18621	-2.31359	0.0560884	0.589174	-4.15427
5222	20	4	6	YDR222W	YDR222W	0.254379	8.59741	2.31306	0.0561312	0.589174	-4.15501
11460	43	3	4	YDR009W	GAL3	0.202257	6.65417	2.31229	0.0561926	0.589345	-4.15606
3627	14	6	11	YGL070C	RPB9	-0.20562	7.84991	-2.3104	0.0563453	0.589517	-4.15869
12726	47	14	6	YOR037W	CYC2	-0.231908	7.81736	-2.31024	0.0563583	0.589517	-4.15891
8607	32	11	15	YLR159W	YLR159W	0.258298	6.65878	2.30948	0.0564197	0.589517	-4.15997
73	1	5	9	YER146W	LSM5	-0.21743	8.81798	-2.30933	0.0564318	0.589517	-4.16017
12151	45	12	7	YMR139W	RIM11	0.247027	8.74187	2.30906	0.0564538	0.589517	-4.16055
6731	25	13	11	YNL074C	MLF3	0.20504	8.63302	2.30874	0.0564801	0.589517	-4.161
9938	37	10	2	YLR030W	YLR030W	-0.292902	8.14249	-2.30736	0.0565915	0.590208	-4.16291
6488	24	15	8	YOR157C	PUP1	0.374067	9.63224	2.30644	0.0566666	0.590518	-4.16419
6584	25	4	8	YDR375C	BCS1	0.205124	6.83573	2.30455	0.0568207	0.591445	-4.16682
8165	31	1	5	YBR134W	YBR134W	-0.203178	8.01661	-2.30389	0.0568744	0.591445	-4.16773
1044	4	15	4	YOR047C	STD1	-0.230777	8.78359	-2.30305	0.0569431	0.591445	-4.1689
2997	12	1	5	YAL061W	BDH2	0.239008	7.61527	2.30245	0.0569918	0.591445	-4.16972
12432	46	12	16	YML086C	ALO1	-0.205267	8.69023	-2.30136	0.0570808	0.591445	-4.17123
5392	20	14	16	YNL255C	GIS2	0.505786	10.7957	2.30054	0.0571485	0.591445	-4.17238
9994	37	13	10	YNL226W	YNL226W	-0.212803	6.69104	-2.30039	0.0571608	0.591445	-4.17259
3543	14	1	7	YAR074C	YAR074C	-0.200675	8.19833	-2.30014	0.0571809	0.591445	-4.17293
6412	24	10	12	YKL167C	MRP49	-0.202596	7.66764	-2.29992	0.0571986	0.591445	-4.17323
2693	10	16	5	YPL091W	GLR1	0.209278	8.86277	2.2984	0.0573234	0.591445	-4.17533
10309	38	16	5	YPL211W	NIP7	0.225964	9.1766	2.29819	0.0573409	0.591445	-4.17563
11882	44	12	10	YML040W	YML040W	-0.385488	14.0981	-2.29763	0.057387	0.591445	-4.17641
12960	48	11	16	YLR175W	CBF5	0.202052	10.3424	2.2971	0.0574311	0.591445	-4.17715
6443	24	12	11	YML063W	RPS1b	0.213892	12.5458	2.29704	0.0574354	0.591445	-4.17722
11907	44	14	3	YNL285W	YNL285W	-0.264966	7.3256	-2.2952	0.0575878	0.591613	-4.17978
10772	40	11	4	YLR173W	YLR173W	0.217371	7.25236	2.29393	0.0576924	0.591613	-4.18154
11159	42	1	7	YAL044C	GCV3	-0.216869	8.86463	-2.29312	0.0577595	0.591613	-4.18266
5201	20	3	1	YDL090C	RAM1	0.262696	7.31964	2.29299	0.0577708	0.591613	-4.18285
155	1	10	11	YKR023W	YKR023W	0.205215	8.67037	2.29256	0.0578063	0.591613	-4.18344
13025	48	16	1	YPL220W	RPL1a	0.439105	12.422	2.29189	0.0578618	0.591613	-4.18437
10985	41	7	9	YHR020W	YHR020W	-0.211372	9.22354	-2.29175	0.0578732	0.591613	-4.18456
12244	46	1	4	YBL031W	SHE1	0.213748	7.67298	2.29133	0.0579087	0.591613	-4.18515
11231	42	5	15	YEL033W	MTC7	-0.257527	11.2766	-2.29028	0.0579953	0.591613	-4.1866
12319	46	5	15	YER046W	SPO73	-0.222469	7.61346	-2.29022	0.0580007	0.591613	-4.18669
2109	8	13	13	YMR324C	YMR324C	-0.220146	6.65011	-2.29012	0.0580093	0.591613	-4.18683
10361	39	2	9	YDL006W	PTC1	-0.199887	8.06279	-2.28901	0.0581011	0.591613	-4.18836
8578	32	10	2	YKR002W	PAP1	0.386733	8.6918	2.2884	0.0581524	0.591613	-4.18921
3333	13	5	5	YFL057C	AAD16	-0.200023	8.38109	-2.28785	0.0581982	0.591613	-4.18997
3498	13	15	10	YOR387C	YOR387C	-0.536989	6.98944	-2.28691	0.0582772	0.591613	-4.19128
3008	12	1	16	YAL010C	MDM10	0.200676	8.3956	2.28673	0.0582916	0.591613	-4.19152
6206	23	14	14	YOR009W	TIR4	-0.23692	8.04848	-2.28633	0.0583255	0.591613	-4.19208
9543	36	2	7	YBR189W	RPS9b	-0.23414	11.7419	-2.28571	0.0583777	0.591613	-4.19295
8525	32	6	13	YGL131C	SNT2	-0.202547	7.90017	-2.28473	0.0584597	0.591613	-4.1943
12188	45	14	12	YOL154W	ZPS1	-0.220264	10.6427	-2.2846	0.0584705	0.591613	-4.19448
10105	38	3	9	YDL198C	GGC1	-0.20792	8.32782	-2.28426	0.0584986	0.591613	-4.19495
1982	8	5	14	YER053C	PIC2	0.610394	8.42862	2.28391	0.0585283	0.591613	-4.19544
9332	35	6	4	YGL193C	YGL193C	-0.317233	7.3584	-2.36961	0.0585305	0.591613	-3.89072
1276	5	12	12	YMR099C	YMR099C	0.284467	9.59542	2.28377	0.0585401	0.591613	-4.19563
12560	47	3	16	YDR099W	BMH2	0.202552	9.84416	2.28158	0.0587244	0.592997	-4.19867
5444	21	1	4	YBR083W	TEC1	0.199594	7.76143	2.27992	0.0588643	0.592997	-4.20096
6901	26	7	5	YGR161C	RTS3	-0.199708	8.64153	-2.27974	0.0588797	0.592997	-4.20122
7518	28	11	14	YLR111W	YLR111W	-0.229752	6.20836	-2.27948	0.0589016	0.592997	-4.20158
2738	11	2	2	YCR020C-A	MAK31	-0.198836	7.32963	-2.27945	0.0589043	0.592997	-4.20162
5350	20	12	6	YML020W	YML020W	0.203414	7.49262	2.27801	0.059026	0.593625	-4.20361
2383	9	13	15	YNL055C	POR1	0.198853	11.6316	2.27764	0.0590577	0.593625	-4.20413
11979	45	1	11	YBR101C	FES1	-0.209942	8.98432	-2.27645	0.0591582	0.593866	-4.20577
8897	33	13	1	YNL134C	YNL134C	0.259979	8.34222	2.27626	0.0591746	0.593866	-4.20604
11671	43	16	7	YPL266W	DIM1	0.281233	8.24098	2.27575	0.0592182	0.593866	-4.20675
783	3	15	15	YOR233W	KIN4	0.250005	7.89621	2.27331	0.0594262	0.595495	-4.21014
9847	37	4	7	YDR479C	PEX29	0.201394	8.02454	2.27246	0.0594986	0.595762	-4.21131
6565	25	3	5	YDR040C	ENA1	-0.240303	10.099	-2.26991	0.0597167	0.596489	-4.21484
9337	35	6	9	YGL237C	HAP2	0.220367	7.64894	2.26949	0.0597531	0.596489	-4.21543
8960	33	16	16	YPL255W	BBP1	0.221192	6.85846	2.26912	0.0597845	0.596489	-4.21594
7654	29	3	6	YDR136C	VPS61	0.46987	6.44842	2.26875	0.0598163	0.596489	-4.21645
4234	16	10	10	YKL207W	EMC3	0.221334	10.4708	2.26866	0.059824	0.596489	-4.21657
11983	45	1	15	YBR099C	YBR099C	-0.225506	7.06998	-2.26831	0.0598539	0.596489	-4.21706
6657	25	9	1	YJR104C	SOD1	0.288494	11.4971	2.26776	0.0599017	0.596489	-4.21783
964	4	10	4	YKL060C	FBA1	0.235665	12.8476	2.26735	0.059937	0.596489	-4.21839
10001	37	14	1	YOR032C	HMS1	0.198345	6.41422	2.26478	0.0601583	0.597819	-4.22195
2568	10	8	8	YHR131C	YHR131C	-0.272121	7.49004	-2.26415	0.0602132	0.597819	-4.22283
7582	28	15	14	YOR113W	AZF1	-0.325354	7.89424	-2.26368	0.0602539	0.597819	-4.22348
11991	45	2	7	YCR097WB	YCR097WB	-0.199906	8.23939	-2.26302	0.0603111	0.597932	-4.2244
10919	41	3	7	YDR008C	YDR008C	-0.248558	7.59757	-2.26224	0.0603786	0.598147	-4.22548
12923	48	9	11	YJL196C	ELO1	-0.209868	8.67503	-2.26154	0.0604387	0.598188	-4.22644
5522	21	6	2	YGR059W	SPR3	0.391087	6.25126	2.26109	0.0604784	0.598188	-4.22707
12421	46	12	5	YMR001C	CDC5	0.209697	8.92557	2.25982	0.0605889	0.598188	-4.22883
12477	46	15	13	YOR226C	ISU2	-0.224979	8.28142	-2.25926	0.0606374	0.598188	-4.2296
12924	48	9	12	YJL196C	ELO1	-0.207756	8.75448	-2.25883	0.0606751	0.598188	-4.2302
5071	19	11	15	YLR247C	IRC20	0.254567	7.98019	2.25848	0.0607053	0.598188	-4.23068
1938	8	3	2	YDL169C	UGX2	0.248071	6.43215	2.25797	0.0607496	0.598188	-4.23138
821	4	1	5	YAL053W	FLC2	0.231479	7.9252	2.25479	0.061028	0.600344	-4.23579
11792	44	6	16	YGL003C	CDH1	-0.24751	8.2712	-2.25349	0.0611425	0.600344	-4.2376
12842	48	4	10	YDR340W	YDR340W	-0.266665	9.02961	-2.25292	0.061192	0.600344	-4.23838
4170	16	6	10	YGL117W	YGL117W	-0.212731	7.75735	-2.25229	0.0612481	0.600344	-4.23926
7440	28	6	16	YFR044C	DUG1	-0.488701	9.6276	-2.25185	0.0612862	0.600344	-4.23986
4388	17	3	4	YDL234C	GYP7	0.212014	8.28286	2.25179	0.0612914	0.600344	-4.23994
357	2	6	5	YGL016W	KAP122	-0.20683	7.94249	-2.25155	0.0613125	0.600344	-4.24028
4292	16	14	4	YNR010W	CSE2	-0.207969	8.19991	-2.25112	0.0613509	0.600344	-4.24088
3245	12	16	13	YPL086C	ELP3	0.212553	8.74737	2.25074	0.0613841	0.600344	-4.2414
3136	12	9	16	YJL066C	MPM1	0.275277	8.21025	2.24922	0.0615187	0.600344	-4.24351
8217	31	4	9	YDR516C	EMI2	0.28387	8.7341	2.24886	0.06155	0.600344	-4.244
1171	5	6	3	YGL258W	VEL1	-0.509574	7.03446	-2.24867	0.0615668	0.600344	-4.24427
5873	22	11	1	YLR206W	ENT2	0.197392	9.19826	2.24833	0.0615969	0.600344	-4.24474
8642	32	14	2	YNR074C	AIF1	-0.245991	8.51163	-2.24815	0.0616127	0.600344	-4.24498
8351	31	12	15	YMR119W-A	YMR119W-A	-0.214378	8.96987	-2.24662	0.0617488	0.601221	-4.24711
9495	35	16	7	YPL258C	THI21	0.208297	7.25771	2.24577	0.0618245	0.601509	-4.24829
6377	24	8	9	YIL056W	VHR1	0.233399	8.02645	2.24505	0.0618882	0.60168	-4.24928
7406	28	4	14	YDR226W	ADK1	-0.217541	10.574	-2.24347	0.0620293	0.602197	-4.25148
2053	8	10	5	YKL201C	MNN4	0.202108	7.86102	2.24318	0.0620547	0.602197	-4.25187
9597	36	5	13	YEL071W	DLD3	-0.211608	10.7667	-2.2429	0.0620798	0.602197	-4.25226
2310	9	9	6	YJR087W	YJR087W	-0.198847	8.21975	-2.24213	0.0621483	0.602258	-4.25332
6378	24	8	10	YIL056W	VHR1	0.203557	8.03588	2.24108	0.0622424	0.602258	-4.25478
6345	24	6	9	YGL125W	MET13	0.246856	8.73633	2.24093	0.0622558	0.602258	-4.25499
12023	45	4	7	YDR487C	RIB3	-0.196096	9.62583	-2.24076	0.0622707	0.602258	-4.25522
8873	33	11	9	YLR313C	SPH1	0.20203	6.858	2.23948	0.0623862	0.602688	-4.257
6082	23	7	2	YHR092C	HXT4	0.195944	8.61841	2.23918	0.0624128	0.602688	-4.25741
2727	11	1	7	YBL092W	RPL32	-0.229424	11.6379	-2.23791	0.0625268	0.602688	-4.25917
4291	16	14	3	YNR010W	CSE2	-0.209778	8.35243	-2.2377	0.0625459	0.602688	-4.25946
547	3	1	3	YBL086C	YBL086C	-0.209102	10.2037	-2.23745	0.0625685	0.602688	-4.25981
2130	8	15	2	YOR191W	ULS1	0.206952	7.50394	2.23685	0.0626222	0.602688	-4.26064
11300	42	10	4	YKL100C	YKL100C	0.204389	8.27601	2.23608	0.0626911	0.602688	-4.2617
9828	37	3	4	YDR098C	GRX3	-0.21081	8.96557	-2.23591	0.0627063	0.602688	-4.26193
10209	38	10	1	YKR011C	YKR011C	0.226142	8.00494	2.23547	0.0627465	0.602688	-4.26255
10979	41	7	3	YHL027W	RIM101	0.215958	8.78678	2.23513	0.0627771	0.602688	-4.26302
5231	20	4	15	YDR171W	HSP42	0.4611	8.2963	2.23423	0.062858	0.60302	-4.26426
2237	9	4	13	YDR403W	DIT1	0.203606	6.58074	2.23268	0.0629982	0.603816	-4.2664
10661	40	4	5	YDR334W	SWR1	-0.224319	8.19813	-2.23206	0.063055	0.603816	-4.26727
10220	38	10	12	YKL184W	SPE1	0.201656	8.90481	2.23161	0.0630957	0.603816	-4.26789
3773	14	15	13	YOR194C	TOA1	0.199534	8.85907	2.22939	0.0632974	0.603816	-4.27096
3579	14	3	11	YDL127W	PCL2	0.214395	7.50856	2.22884	0.0633471	0.603816	-4.27172
10226	38	11	2	YLR222C	UTP13	0.227074	8.42553	2.22862	0.0633673	0.603816	-4.27203
10522	39	12	10	YMR173W	DDR48	0.262676	9.97865	2.22831	0.0633953	0.603816	-4.27245
4089	16	1	9	YBL042C	FUI1	-0.217779	8.85769	-2.22767	0.0634544	0.603816	-4.27335
6095	23	7	15	YHR040W	BCD1	0.1948	7.0411	2.2276	0.0634603	0.603816	-4.27344
7892	30	1	4	YBL015W	ACH1	0.194121	7.39996	2.22598	0.0636085	0.603816	-4.27568
1111	5	2	7	YCR057C	PWP2	0.246735	7.59589	2.22585	0.0636205	0.603816	-4.27586
5383	20	14	7	YNL259C	ATX1	-0.197	8.58429	-2.22531	0.0636699	0.603816	-4.27661
11427	43	1	3	YBR012C	YBR012C	-0.195624	8.79732	-2.22478	0.0637186	0.603816	-4.27735
10533	39	13	5	YNL227C	JJJ1	0.193985	7.73121	2.22403	0.0637875	0.603816	-4.27838
3020	12	2	12	YBR163W	EXO5	0.242003	8.99967	2.22378	0.0638098	0.603816	-4.27872
10952	41	5	8	YER140W	EMP65	0.232198	7.84695	2.22291	0.0638896	0.603816	-4.27992
2864	11	9	16	YJR033C	RAV1	-0.836808	7.70972	-2.22287	0.0638937	0.603816	-4.27999
10611	40	1	3	YBL022C	PIM1	0.200743	8.97634	2.22219	0.063956	0.603816	-4.28092
4351	16	17	15	YPR179C	HDA3	0.287377	7.86244	2.22213	0.0639618	0.603816	-4.28101
10827	40	14	11	YNR030W	ALG12	0.19407	9.40484	2.2219	0.0639827	0.603816	-4.28132
10891	41	1	11	YBR009C	HHF1	-0.212952	10.9006	-2.22111	0.0640551	0.603816	-4.28241
9808	37	1	16	YBR091C	TIM12	-0.263288	6.79665	-2.22067	0.0640964	0.603816	-4.28303
7713	29	7	1	YHR101C	BIG1	0.211145	6.74309	2.22029	0.0641311	0.603816	-4.28355
11315	42	11	3	YLR086W	SMC4	-0.213058	8.86207	-2.21987	0.06417	0.603816	-4.28414
4260	16	12	4	YML059C	NTE1	0.340708	7.84428	2.21934	0.0642189	0.603816	-4.28487
10382	39	3	14	YDR139C	RUB1	-0.228098	7.67361	-2.21831	0.064314	0.603816	-4.28629
9123	34	10	3	YKL093W	MBR1	0.204916	7.61784	2.21764	0.0643764	0.603816	-4.28722
6003	23	2	3	YCR074C	YCR074C	-0.19338	6.26831	-2.21699	0.0644363	0.603816	-4.28812
10920	41	3	8	YDR008C	YDR008C	-0.241006	7.63998	-2.21489	0.0646311	0.603816	-4.29102
12080	45	7	16	YHR064C	SSZ1	-0.194004	9.60147	-2.21459	0.0646594	0.603816	-4.29144
11893	44	13	5	YMR277W	FCP1	0.194745	8.38425	2.21393	0.0647204	0.603816	-4.29235
12195	45	15	3	YOR375C	GDH1	0.230071	9.15412	2.21314	0.0647937	0.603816	-4.29344
10359	39	2	7	YCR089W	FIG2	-0.294903	7.34095	-2.21266	0.064839	0.603816	-4.29411
12220	45	16	12	YPR078C	YPR078C	0.202016	7.25086	2.21091	0.0650021	0.603816	-4.29652
12245	46	1	5	YBL077W	YBL077W	-0.231888	8.88133	-2.21026	0.0650627	0.603816	-4.29742
11031	41	10	7	YKR065C	PAM17	-0.193623	7.6995	-2.20978	0.065108	0.603816	-4.29809
9121	34	10	1	YKL140W	TGL1	0.235642	7.84352	2.20974	0.0651118	0.603816	-4.29814
1800	7	11	8	YLR330W	CHS5	0.225112	9.08998	2.20951	0.0651337	0.603816	-4.29847
11549	43	8	13	YIL174W	YIL174W	-0.209114	6.57341	-2.20935	0.0651478	0.603816	-4.29867
8375	31	14	7	YOL139C	CDC33	0.192603	11.1603	2.20845	0.0652329	0.603816	-4.29993
13034	48	16	10	YPL216W	YPL216W	-0.197148	7.74377	-2.20717	0.0653529	0.603816	-4.3017
3151	12	10	15	YKL062W	MSN4	0.228963	7.77588	2.20715	0.0653544	0.603816	-4.30172
10106	38	3	10	YDL198C	GGC1	-0.192746	8.55872	-2.20706	0.0653634	0.603816	-4.30185
2558	10	7	14	YGR141W	VPS62	0.223661	8.41689	2.20667	0.0653995	0.603816	-4.30238
7587	28	16	3	YPL060W	MFM1	0.195619	8.59519	2.20611	0.0654527	0.603816	-4.30316
9583	36	4	15	YDR186C	YDR186C	-0.381749	9.30255	-2.20565	0.0654963	0.603816	-4.3038
5758	22	3	14	YDL180W	YDL180W	0.206372	7.80321	2.20539	0.06552	0.603816	-4.30415
9692	36	11	12	YLR073C	RFU1	0.195765	9.15893	2.20527	0.0655317	0.603816	-4.30432
8822	33	8	6	YIL171W	YIL171W	-0.193093	6.38211	-2.20467	0.0655881	0.603816	-4.30515
12642	47	9	2	YKL052C	ASK1	-0.21734	8.53429	-2.20389	0.0656617	0.603816	-4.30623
10155	38	6	11	YGL094C	PAN2	-0.202622	8.99764	-2.20383	0.0656675	0.603816	-4.30631
11250	42	7	2	YGR179C	OKP1	0.231388	7.59706	2.20195	0.0658452	0.603816	-4.30891
8509	32	5	13	YER074W	RPS24a	-0.263149	11.1683	-2.20182	0.0658575	0.603816	-4.30909
11174	42	2	6	YBR246W	RRT2	0.197547	8.008	2.20116	0.0659205	0.603816	-4.31
8500	32	5	4	YER036C	ARB1	0.221382	9.82355	2.20089	0.0659456	0.603816	-4.31037
5366	20	13	6	YMR253C	YMR253C	0.193682	7.67379	2.2005	0.065983	0.603816	-4.31091
335	2	4	15	YDR156W	RPA14	-0.191944	8.49137	-2.19929	0.0660983	0.603816	-4.31259
9963	37	11	11	YLR361C	DCR2	0.19178	7.56653	2.19865	0.0661592	0.603816	-4.31348
4844	18	14	12	YNL258C	DSL1	0.193825	7.83167	2.19845	0.0661777	0.603816	-4.31374
12373	46	9	5	YJR022W	LSM8	-0.19623	7.01398	-2.1984	0.0661829	0.603816	-4.31382
7012	26	14	4	YNL270C	ALP1	0.193349	7.31434	2.1979	0.0662303	0.603816	-4.31451
4116	16	3	4	YDL130W	RPP1b	-0.222274	11.1172	-2.19772	0.0662477	0.603816	-4.31476
11428	43	1	4	YBR012C	YBR012C	-0.191606	8.84509	-2.19724	0.0662932	0.603816	-4.31542
454	2	12	6	YML008C	ERG6	0.21494	11.8688	2.19643	0.0663709	0.603816	-4.31654
11156	42	1	4	YAL046C	AIM1	-0.223134	7.54897	-2.19616	0.0663968	0.603816	-4.31692
9202	34	15	2	YOR128C	ADE2	0.205529	8.76679	2.19511	0.0664971	0.603816	-4.31837
8469	32	3	5	YDL191W	RPL35a	0.348559	12.062	2.1947	0.0665361	0.603816	-4.31893
12548	47	3	4	YDR105C	TMS1	0.297291	8.30703	2.19362	0.06664	0.603816	-4.32043
8678	32	16	6	YPL202C	AFT2	0.225746	7.86556	2.19356	0.0666457	0.603816	-4.32051
9596	36	5	12	YEL026W	SNU13	-0.205956	10.395	-2.19339	0.0666617	0.603816	-4.32074
11824	44	8	16	YHR156C	LIN1	-0.191826	7.71782	-2.19333	0.0666675	0.603816	-4.32082
11202	42	4	2	YDR249C	YDR249C	-0.198629	7.27719	-2.1931	0.0666898	0.603816	-4.32115
12969	48	12	9	YML131W	YML131W	0.232012	7.82208	2.19304	0.0666954	0.603816	-4.32123
10044	37	16	12	YPR070W	MED1	0.196176	7.7515	2.19287	0.0667119	0.603816	-4.32146
12468	46	15	4	YOR184W	SER1	0.268655	10.7996	2.19262	0.0667357	0.603816	-4.32181
12168	45	13	8	YNL188W	KAR1	0.195938	8.46066	2.19213	0.0667826	0.603816	-4.32248
11881	44	12	9	YML040W	YML040W	-0.351346	13.9691	-2.19178	0.0668162	0.603816	-4.32296
522	2	16	10	YPL081W	RPS9a	0.236751	11.7408	2.19142	0.066851	0.603816	-4.32346
12277	46	3	5	YDL208W	NHP2	0.198039	8.54551	2.19134	0.0668589	0.603816	-4.32358
6303	24	3	15	YDL132W	CDC53	-0.299911	9.00391	-2.19001	0.0669868	0.603816	-4.32541
68	1	5	4	YER103W	SSA4	0.191321	9.31018	2.18981	0.0670061	0.603816	-4.32569
856	4	3	8	YDL024C	DIA3	0.222397	6.68051	2.18939	0.0670465	0.603816	-4.32627
1275	5	12	11	YMR099C	YMR099C	0.265236	9.59591	2.18913	0.0670713	0.603816	-4.32662
12379	46	9	11	YJL197W	UBP12	-0.193267	7.98426	-2.18904	0.0670806	0.603816	-4.32675
6838	26	3	6	YDL097C	RPN6	0.207878	9.13307	2.18901	0.0670833	0.603816	-4.32679
12634	47	8	10	YJL052W	TDH1	0.191839	13.9153	2.18899	0.0670849	0.603816	-4.32682
6415	24	10	15	YKL165C	MCD4	-0.197853	8.89239	-2.18875	0.0671081	0.603816	-4.32715
7376	28	2	16	YBR177C	EHT1	-0.307474	8.96088	-2.18859	0.0671238	0.603816	-4.32737
8663	32	15	7	YOR165W	SEY1	-0.427267	8.7406	-2.18823	0.0671581	0.603816	-4.32786
2262	9	6	6	YGL216W	KIP3	0.191752	7.63529	2.18809	0.0671723	0.603816	-4.32806
8513	32	6	1	YGL137W	SEC27	-0.19952	9.97092	-2.18769	0.0672103	0.603816	-4.32861
8372	31	14	4	YOL141W	PPM2	0.227551	6.79162	2.18721	0.067257	0.603816	-4.32927
7504	28	10	16	YKL078W	DHR2	-0.381916	7.38917	-2.18695	0.0672824	0.603816	-4.32964
9660	36	9	12	YJL092W	SRS2	-0.210585	8.16794	-2.18686	0.0672912	0.603816	-4.32976
9622	36	7	6	YGR168C	YGR168C	-0.194554	7.96822	-2.1851	0.0674614	0.604526	-4.33218
11267	42	8	3	YHR163W	SOL3	-0.295678	8.1899	-2.18509	0.067463	0.604526	-4.33221
11338	42	12	10	YML041C	VPS71	0.193731	7.91488	2.18443	0.067527	0.604684	-4.33312
4843	18	14	11	YNL258C	DSL1	0.194078	7.26585	2.18366	0.0676019	0.604755	-4.33418
3045	12	4	5	YDR214W	AHA1	0.360725	9.68111	2.18299	0.0676665	0.604755	-4.3351
4391	17	3	7	YDL232W	OST4	-0.207638	7.56262	-2.18285	0.0676804	0.604755	-4.33529
5404	20	15	12	YOR059C	YOR059C	0.199561	8.79586	2.1824	0.0677244	0.604755	-4.33592
10331	38	17	11	YPR186C	PZF1	0.221991	7.09881	2.18197	0.0677667	0.604755	-4.33652
5424	20	16	16	YPL046C	ELC1	0.250631	7.527	2.18149	0.0678131	0.604756	-4.33717
9686	36	11	6	YLR123C	YLR123C	-0.192449	7.45041	-2.18076	0.0678844	0.604978	-4.33818
10664	40	4	8	YDR286C	YDR286C	-0.210055	7.34914	-2.1791	0.0680471	0.60567	-4.34048
8898	33	13	2	YNL134C	YNL134C	0.228055	8.27141	2.17896	0.0680607	0.60567	-4.34067
11867	44	11	11	YLR081W	GAL2	0.192615	7.25585	2.17855	0.0681013	0.60567	-4.34124
12523	47	1	11	YBR100W	YBR100W	-0.224688	6.37525	-2.17761	0.0681931	0.606073	-4.34253
11224	42	5	8	YEL037C	RAD23	0.195918	8.09642	2.17574	0.0683766	0.606184	-4.34511
11468	43	3	12	YDR005C	MAF1	0.24809	8.04386	2.1745	0.0684987	0.606184	-4.34682
4287	16	13	15	YMR289W	ABZ2	0.194254	8.49007	2.17404	0.0685441	0.606184	-4.34745
11640	43	14	8	YOL058W	ARG1	-0.224838	8.1343	-2.17376	0.0685722	0.606184	-4.34785
12329	46	6	9	YGL150C	INO80	-0.191582	11.1791	-2.17355	0.0685932	0.606184	-4.34814
9763	36	16	3	YPL068C	YPL068C	0.210328	7.56936	2.17267	0.0686797	0.606184	-4.34935
3714	14	12	2	YML105C	SEC65	-0.189708	8.19254	-2.17259	0.0686874	0.606184	-4.34946
2201	9	2	9	YCR018C	SRD1	-0.19124	6.97809	-2.17091	0.0688544	0.606184	-4.35178
2154	8	16	10	YPL176C	TRE1	-0.267772	8.10543	-2.17018	0.0689267	0.606184	-4.35279
5079	19	12	7	YMR024W	MRPL3	0.189219	8.52615	2.16991	0.0689534	0.606184	-4.35316
7618	29	1	2	YBR137W	YBR137W	-0.382523	8.43643	-2.16918	0.0690261	0.606184	-4.35417
1432	6	5	8	YER012W	PRE1	0.264206	8.75196	2.16888	0.0690551	0.606184	-4.35457
4365	17	1	13	YBR029C	CDS1	-0.195792	8.66309	-2.16872	0.0690714	0.606184	-4.3548
8544	32	7	16	YGR204W	ADE3	-0.189978	9.45908	-2.16837	0.0691065	0.606184	-4.35529
8462	32	2	14	YCL020W	YCL020W	-0.277296	11.6292	-2.16833	0.0691099	0.606184	-4.35533
10484	39	10	4	YLL048C	YBT1	0.223096	7.10928	2.16806	0.0691372	0.606184	-4.35571
7714	29	7	2	YHR101C	BIG1	0.195837	6.75789	2.16735	0.0692081	0.606184	-4.35669
5	1	1	5	YBR017C	KAP104	-0.189133	8.92287	-2.16715	0.0692276	0.606184	-4.35696
242	1	16	2	YPL277C	YPL277C	0.188977	6.58289	2.16699	0.0692433	0.606184	-4.35718
2641	10	13	1	YMR247C	RKR1	0.195663	7.88017	2.16684	0.0692583	0.606184	-4.35739
1177	5	6	9	YGR039W	YGR039W	-0.189994	6.78052	-2.1656	0.0693827	0.606184	-4.35911
5587	21	10	3	YLL033W	IRC19	-0.201008	9.21684	-2.16525	0.0694176	0.606184	-4.35959
9593	36	5	9	YEL073C	YEL073C	-0.194955	8.01643	-2.16488	0.0694547	0.606184	-4.3601
12101	45	9	5	YKL051W	SFK1	0.255225	7.68907	2.16437	0.0695059	0.606184	-4.36081
11297	42	10	1	YKL148C	SDH1	0.189054	7.26887	2.16418	0.0695241	0.606184	-4.36106
5435	20	17	11	YPR197C	YPR197C	-0.213684	7.4964	-2.16401	0.0695419	0.606184	-4.3613
6881	26	6	1	YGL042C	YGL042C	-0.216743	7.24373	-2.16396	0.0695465	0.606184	-4.36137
11919	44	14	15	YNL279W	PRM1	-0.255808	7.65485	-2.16394	0.0695482	0.606184	-4.36139
12613	47	7	5	YHR114W	BZZ1	0.224507	7.98538	2.1639	0.069553	0.606184	-4.36146
8472	32	3	8	YDL143W	CCT4	-0.348477	9.14723	-2.16339	0.069604	0.606224	-4.36216
2784	11	4	16	YDR354W	TRP4	-0.19922	9.06784	-2.1623	0.0697128	0.606766	-4.36365
12710	47	13	6	YNL235C	YNL235C	-0.319651	7.98465	-2.1613	0.0698134	0.607052	-4.36504
9544	36	2	8	YBR189W	RPS9b	-0.190592	11.5888	-2.16061	0.0698827	0.607052	-4.36599
7663	29	3	15	YDR084C	TVP23	-0.217611	7.67401	-2.16059	0.0698852	0.607052	-4.36602
11277	42	8	13	YHR205W	SCH9	0.190817	8.35994	2.15939	0.070006	0.607697	-4.36767
985	4	11	9	YLR089C	ALT1	-0.197033	9.66761	-2.15823	0.0701232	0.608126	-4.36928
9004	34	2	12	YBR188C	NTC20	-0.225126	7.88844	-2.15797	0.0701487	0.608126	-4.36962
12660	47	10	4	YLL056C	YLL056C	-0.21215	9.23801	-2.15695	0.0702521	0.608298	-4.37103
1607	6	16	7	YPL131W	RPL5	0.225973	11.1809	2.15666	0.0702812	0.608298	-4.37143
3119	12	8	15	YHR126C	ANS1	0.189292	6.46391	2.15506	0.0704438	0.608298	-4.37364
3632	14	6	16	YGL068W	MNP1	-0.187923	8.5634	-2.15506	0.070444	0.608298	-4.37365
7502	28	10	14	YKL125W	RRN3	-0.379763	8.63538	-2.15452	0.0704986	0.608298	-4.37439
1532	6	11	12	YLR138W	NHA1	0.223675	7.60031	2.15448	0.0705022	0.608298	-4.37444
8113	30	15	1	YOR216C	RUD3	0.188326	7.77727	2.15376	0.0705758	0.608298	-4.37543
1850	7	14	10	YOL161C	PAU20	-0.214583	8.56023	-2.15369	0.0705824	0.608298	-4.37552
3912	15	7	8	YHR037W	PUT2	0.196231	7.74479	2.15364	0.0705881	0.608298	-4.3756
8164	31	1	4	YBR089W	YBR089W	-0.193554	7.78174	-2.1526	0.0706935	0.608804	-4.37703
1427	6	5	3	YER014W	HEM14	-0.190529	8.67136	-2.15122	0.0708345	0.609616	-4.37894
8563	32	9	3	YJL184W	GON7	0.569501	8.39483	2.15013	0.0709451	0.610166	-4.38043
3120	12	8	16	YHR126C	ANS1	0.190071	6.51996	2.14954	0.0710061	0.610288	-4.38125
8579	32	10	3	YKL179C	COY1	0.41149	8.49987	2.1472	0.0712458	0.611944	-4.38447
1519	6	10	15	YKL150W	MCR1	0.260622	9.18407	2.1458	0.0713892	0.612148	-4.3864
12205	45	15	13	YPL023C	MET12	0.188806	9.08084	2.14568	0.0714015	0.612148	-4.38656
7169	27	7	1	YHR007C	ERG11	0.18838	11.8024	2.14528	0.0714427	0.612148	-4.38712
3187	12	13	3	YMR199W	CLN1	0.255497	9.05357	2.14481	0.0714916	0.612148	-4.38777
3310	13	3	14	YDR116C	MRPL1	-0.192174	7.63395	-2.14442	0.0715311	0.612148	-4.3883
108	1	7	12	YGR279C	SCW4	0.187719	12.3757	2.14423	0.0715509	0.612148	-4.38856
11166	42	1	14	YAR035W	YAT1	-0.187052	8.17196	-2.14334	0.0716428	0.612382	-4.38979
10199	38	9	7	YJL191W	RPS14b	0.247613	11.6784	2.14306	0.0716722	0.612382	-4.39018
9992	37	13	8	YNL180C	RHO5	0.188732	7.82658	2.14177	0.0718048	0.613032	-4.39195
10670	40	4	14	YDR330W	UBX5	-0.230899	7.1982	-2.14111	0.071873	0.613032	-4.39286
4837	18	14	5	YNL308C	KRI1	0.186767	8.25849	2.14096	0.0718892	0.613032	-4.39307
3152	12	10	16	YKL062W	MSN4	0.231512	7.55439	2.13936	0.0720543	0.613145	-4.39527
2059	8	10	11	YKL151C	YKL151C	0.329663	9.1617	2.13914	0.0720772	0.613145	-4.39557
686	3	9	14	YJR073C	OPI3	-0.221608	11.9143	-2.13905	0.0720874	0.613145	-4.39571
585	3	3	9	YDR013W	PSF1	-0.190868	8.21095	-2.13902	0.0720905	0.613145	-4.39575
6837	26	3	5	YDL097C	RPN6	0.191113	9.32383	2.13742	0.072256	0.613247	-4.39794
3839	15	2	15	YCR060W	TAH1	-0.188917	8.04438	-2.13727	0.0722715	0.613247	-4.39815
9988	37	13	4	YNL182C	IPI3	0.202799	8.09919	2.13714	0.0722852	0.613247	-4.39833
12838	48	4	6	YDR342C	HXT7	0.213701	10.1021	2.13709	0.0722905	0.613247	-4.3984
11089	41	14	1	YOL110W	SHR5	-0.217015	7.94257	-2.13635	0.0723681	0.613248	-4.39942
8245	31	6	5	YGR064W	YGR064W	-0.186334	7.97984	-2.13619	0.0723847	0.613248	-4.39964
7142	27	5	6	YER171W	RAD3	-0.199219	5.98661	-2.13481	0.0725289	0.614072	-4.40154
2397	9	14	13	YOL071W	EMI5	0.19413	7.82494	2.13428	0.0725844	0.61414	-4.40227
4496	17	9	16	YJR042W	NUP85	-0.189756	6.11052	-2.13383	0.0726311	0.61414	-4.40289
9761	36	16	1	YPL116W	HOS3	0.20289	7.98348	2.13193	0.0728306	0.614695	-4.40551
10424	39	6	8	YGR024C	THG1	-0.185903	8.44219	-2.13177	0.0728471	0.614695	-4.40573
7669	29	4	5	YDR519W	FPR2	-0.221374	8.88994	-2.13161	0.0728635	0.614695	-4.40594
9	1	1	9	YBR015C	MNN2	-0.189831	9.67149	-2.13081	0.0729478	0.614695	-4.40705
12293	46	4	5	YDR343C	HXT6	0.186126	9.74019	2.13059	0.0729713	0.614695	-4.40735
6374	24	8	6	YIL058W	YIL058W	-0.223162	6.61352	-2.12899	0.0731397	0.614695	-4.40956
12957	48	11	13	YLR223C	IFH1	0.213807	8.52434	2.12816	0.0732273	0.614695	-4.4107
10340	39	1	4	YBR096W	YBR096W	-0.19166	9.57856	-2.12759	0.0732873	0.614695	-4.41148
2236	9	4	12	YDR357C	CNL1	-0.187468	8.06722	-2.12755	0.0732914	0.614695	-4.41153
236	1	15	12	YOR236W	DFR1	0.214789	7.99262	2.12752	0.0732946	0.614695	-4.41158
11066	41	12	10	YMR091C	NPL6	-0.186424	9.27237	-2.12663	0.0733884	0.614695	-4.4128
3740	14	13	12	YMR291W	TDA1	0.189938	8.03046	2.12659	0.0733921	0.614695	-4.41285
10759	40	10	7	YKL185W	ASH1	0.223324	9.71835	2.12651	0.0734015	0.614695	-4.41297
12534	47	2	6	YDL016C	YDL016C	-0.213344	6.5949	-2.12582	0.0734742	0.614695	-4.41391
7114	27	3	10	YDR037W	KRS1	0.188482	10.4072	2.12549	0.0735092	0.614695	-4.41437
11797	44	7	5	YGR176W	YGR176W	-0.311459	8.77996	-2.12543	0.0735156	0.614695	-4.41445
470	2	13	6	YMR238W	DFG5	0.185574	9.01455	2.12542	0.0735167	0.614695	-4.41447
8442	32	1	10	YBL058W	SHP1	-0.313085	9.03856	-2.12515	0.0735447	0.614695	-4.41483
5179	20	1	11	YAL020C	ATS1	-0.195352	7.8604	-2.12424	0.0736419	0.614839	-4.41609
11160	42	1	8	YAL044C	GCV3	-0.213521	8.65612	-2.1241	0.0736563	0.614839	-4.41628
7565	28	14	13	YNL311C	SKP2	0.299254	8.04761	2.12233	0.0738444	0.615544	-4.41871
2158	8	16	14	YPL174C	NIP100	-0.198115	7.37324	-2.12136	0.0739481	0.615544	-4.42005
4825	18	13	9	YMR252C	YMR252C	0.225095	8.16948	2.12084	0.074003	0.615544	-4.42076
5410	20	16	2	YPL100W	ATG21	0.223165	8.11549	2.12081	0.0740063	0.615544	-4.4208
10426	39	6	10	YGR070W	ROM1	-0.204397	8.21933	-2.12079	0.074009	0.615544	-4.42084
8990	34	1	14	YAR020C	PAU7	-0.199485	6.72032	-2.12065	0.0740238	0.615544	-4.42103
10496	39	10	16	YLL042C	ATG10	-0.200151	7.58582	-2.11918	0.07418	0.615685	-4.42304
12483	46	16	3	YPL173W	MRPL40	0.216199	7.75956	2.11902	0.074197	0.615685	-4.42326
1592	6	15	8	YOR142W	LSC1	0.335329	7.3835	2.11835	0.0742689	0.615685	-4.42419
5100	19	13	12	YNL065W	AQR1	0.299826	7.22192	2.11832	0.0742721	0.615685	-4.42423
3284	13	2	4	YCR067C	SED4	-0.224625	6.87617	-2.11776	0.0743322	0.615685	-4.425
2084	8	12	4	YML052W	SUR7	0.227897	10.2745	2.11752	0.0743577	0.615685	-4.42533
8371	31	14	3	YOL141W	PPM2	0.250862	6.86288	2.11679	0.0744367	0.615685	-4.42634
7313	27	16	1	YPR017C	DSS4	0.326206	7.62477	2.11642	0.0744762	0.615685	-4.42685
10804	40	13	4	YMR316C-A	YMR316C-A	-0.320926	7.13822	-2.11564	0.0745599	0.615685	-4.42792
8590	32	10	14	YKL221W	MCH2	0.188313	6.28661	2.11473	0.074658	0.616105	-4.42917
10	1	1	10	YBR015C	MNN2	-0.184349	9.64031	-2.11382	0.0747557	0.616522	-4.43042
5505	21	5	1	YFL067W	YFL067W	0.213608	10.1813	2.11326	0.0748156	0.616626	-4.43118
4561	17	14	1	YOL086C	ADH1	0.284701	13.0716	2.10881	0.075297	0.619507	-4.4373
9169	34	13	1	YMR272C	SCS7	0.184602	8.30957	2.1082	0.0753637	0.619507	-4.43815
67	1	5	3	YER103W	SSA4	0.185074	9.23086	2.10736	0.075455	0.619507	-4.4393
2567	10	8	7	YHR131C	YHR131C	-0.258395	7.64815	-2.10713	0.07548	0.619507	-4.43962
465	2	13	1	YMR240C	CUS1	0.184812	7.79096	2.10711	0.0754818	0.619507	-4.43964
2384	9	13	16	YNL055C	POR1	0.196458	11.3887	2.10659	0.0755385	0.619507	-4.44036
12828	48	3	12	YDL157C	YDL157C	-0.301479	8.76187	-2.1064	0.0755586	0.619507	-4.44061
8441	32	1	9	YBL058W	SHP1	-0.278806	9.43771	-2.10609	0.0755925	0.619507	-4.44104
12294	46	4	6	YDR343C	HXT6	0.190232	9.93558	2.10443	0.0757742	0.62004	-4.44333
3752	14	14	8	YNR009W	NRM1	0.193744	8.00944	2.10423	0.0757953	0.62004	-4.44359
12374	46	9	6	YJR022W	LSM8	-0.194804	7.20422	-2.1041	0.0758096	0.62004	-4.44377
9305	35	4	9	YDR428C	BNA7	-0.183445	8.01223	-2.10368	0.0758563	0.62004	-4.44436
5612	21	11	12	YLR345W	YLR345W	0.210297	8.0219	2.10278	0.0759538	0.62004	-4.44558
320	2	3	16	YDL021W	GPM2	0.186046	7.50925	2.10272	0.075961	0.62004	-4.44567
1433	6	5	9	YER056C	FCY2	0.254206	9.65753	2.10245	0.0759902	0.62004	-4.44604
6354	24	7	2	YGR250C	YGR250C	0.186975	7.69349	2.10048	0.0762071	0.620902	-4.44876
1608	6	16	8	YPL131W	RPL5	0.220266	11.1565	2.1004	0.0762149	0.620902	-4.44886
818	4	1	2	YAL055W	PEX22	0.191745	7.52608	2.10019	0.0762385	0.620902	-4.44915
8501	32	5	5	YER078C	ICP55	0.266189	7.55626	2.09895	0.0763747	0.620983	-4.45085
8609	32	12	1	YML119W	YML119W	0.204956	8.23586	2.09888	0.0763829	0.620983	-4.45095
6274	24	2	2	YCL018W	LEU2	-0.195995	8.43357	-2.0988	0.0763914	0.620983	-4.45106
4252	16	11	12	YLR145W	RMP1	0.209385	8.14181	2.09771	0.0765119	0.621037	-4.45256
11899	44	13	11	YMR227C	TAF7	0.195299	8.19863	2.09603	0.0766968	0.621037	-4.45486
10037	37	16	5	YPR120C	CLB5	0.182748	8.11516	2.09559	0.0767456	0.621037	-4.45547
2681	10	15	9	YOR100C	CRC1	0.183417	6.22821	2.09504	0.0768064	0.621037	-4.45622
8471	32	3	7	YDL143W	CCT4	0.361626	9.43046	2.0949	0.0768219	0.621037	-4.45641
8890	33	12	10	YMR084W	YMR084W	0.187409	6.3105	2.09479	0.0768335	0.621037	-4.45656
7615	28	17	15	YPR135W	CTF4	-0.188995	7.73253	-2.09476	0.0768369	0.621037	-4.4566
7372	28	2	12	YBR179C	FZO1	-0.416578	10.4237	-2.09445	0.0768711	0.621037	-4.45702
69	1	5	5	YER148W	SPT15	-0.191257	9.58678	-2.09368	0.0769571	0.621037	-4.45809
6235	23	16	11	YPR053C	YPR053C	0.194647	9.94361	2.09356	0.0769705	0.621037	-4.45825
11447	43	2	7	YCR003W	MRPL32	-0.192109	7.59365	-2.09275	0.0770602	0.621037	-4.45936
1156	5	5	4	YFL008W	SMC1	-0.185013	8.14699	-2.09271	0.0770644	0.621037	-4.45942
6236	23	16	12	YPR053C	YPR053C	0.202349	9.80721	2.09248	0.0770902	0.621037	-4.45973
3017	12	2	9	YBR211C	AME1	-0.18994	8.43893	-2.09161	0.0771874	0.621037	-4.46093
8772	33	5	4	YER134C	YER134C	-0.199877	7.615	-2.09153	0.0771963	0.621037	-4.46104
1477	6	8	5	YIL043C	CBR1	-0.189115	10.1669	-2.09109	0.0772444	0.621037	-4.46164
8032	30	9	16	YJL179W	PFD1	-0.21157	8.11081	-2.091	0.0772547	0.621037	-4.46176
10616	40	1	8	YBL020W	RFT1	-0.182865	9.00736	-2.09016	0.0773484	0.621407	-4.46292
9819	37	2	11	YCR088W	ABP1	0.189996	8.55756	2.08969	0.0774012	0.621448	-4.46357
12611	47	7	3	YHR069C	RRP4	0.193796	7.95582	2.08885	0.0774952	0.621718	-4.46472
2344	9	11	8	YLR244C	MAP1	-0.192508	5.9902	-2.08817	0.077571	0.621718	-4.46565
11627	43	13	11	YNL089C	YNL089C	-0.191408	7.77097	-2.08811	0.0775778	0.621718	-4.46574
10566	39	15	6	YPL018W	CTF19	0.356565	7.18986	2.08743	0.0776537	0.621792	-4.46667
8275	31	8	3	YIR035C	YIR035C	0.183263	8.34067	2.08717	0.0776824	0.621792	-4.46702
8314	31	10	10	YLR017W	MEU1	0.234668	11.569	2.08532	0.0778898	0.62276	-4.46956
8069	30	12	5	YML118W	NGL3	0.183681	6.5598	2.08482	0.077946	0.62276	-4.47025
8675	32	16	3	YPL156C	PRM4	-0.276576	9.00844	-2.08432	0.0780022	0.622824	-4.47093
9814	37	2	6	YDL009C	YDL009C	-0.293717	7.21356	-2.0825	0.0782068	0.623707	-4.47343
10132	38	5	4	YER044C-A	MEI4	0.191793	6.27147	2.08224	0.078237	0.623707	-4.47379
10612	40	1	4	YBL022C	PIM1	0.181928	9.13783	2.08203	0.07826	0.623707	-4.47407
6466	24	14	2	YNR066C	YNR066C	0.190226	6.92008	2.08164	0.0783047	0.623707	-4.47462
7301	27	15	5	YOR308C	SNU66	0.185833	7.33909	2.08122	0.0783518	0.623707	-4.47519
8803	33	7	3	YHL019C	APM2	0.198249	7.32549	2.08062	0.0784199	0.623869	-4.47601
9767	36	16	7	YPL066W	RGL1	0.18972	8.66691	2.07971	0.0785221	0.624301	-4.47725
10844	40	15	12	YOR171C	LCB4	0.192803	8.04199	2.07818	0.0786961	0.625303	-4.47936
2427	9	16	11	YPL233W	NSL1	0.198749	7.70008	2.07691	0.0788402	0.625396	-4.4811
9584	36	4	16	YDR186C	YDR186C	-0.494761	9.33886	-2.07632	0.0789074	0.625396	-4.48191
8107	30	14	11	YNR023W	SNF12	0.182609	7.63485	2.0763	0.0789091	0.625396	-4.48193
11806	44	7	14	YGR172C	YIP1	-0.183108	9.42401	-2.07558	0.0789907	0.625396	-4.48291
13024	48	15	16	YOR177C	MPC54	0.223669	6.63847	2.07555	0.0789948	0.625396	-4.48296
7380	28	3	4	YDL050C	YDL050C	-0.18099	8.41291	-2.07514	0.0790409	0.625396	-4.48352
7809	29	13	1	YNL222W	SSU72	-0.201328	7.88915	-2.07512	0.0790433	0.625396	-4.48355
3774	14	15	14	YOR194C	TOA1	0.206703	8.76661	2.07427	0.0791402	0.625483	-4.48471
3276	13	1	12	YBR071W	YBR071W	-0.193236	8.49056	-2.07249	0.0793439	0.625483	-4.48716
4035	15	15	3	YOR342C	YOR342C	0.18918	8.37282	2.07223	0.0793731	0.625483	-4.48751
20	1	2	4	YCL051W	LRE1	0.205689	8.44778	2.07184	0.0794179	0.625483	-4.48804
1817	7	12	9	YMR144W	YMR144W	0.180904	7.43128	2.07182	0.0794203	0.625483	-4.48807
9000	34	2	8	YBR190W	YBR190W	-0.192361	6.82233	-2.07158	0.079448	0.625483	-4.4884
775	3	15	7	YOR237W	HES1	-0.182894	10.195	-2.07117	0.0794951	0.625483	-4.48897
8880	33	11	16	YLR264W	RPS28b	0.288362	9.29915	2.07108	0.079505	0.625483	-4.48908
10764	40	10	12	YKL183W	LOT5	-0.180908	8.01822	-2.07106	0.0795073	0.625483	-4.48911
1731	7	7	3	YHR031C	RRM3	0.193016	6.57816	2.07081	0.0795358	0.625483	-4.48945
9545	36	2	9	YBR235W	VHC1	-0.321151	8.29505	-2.07041	0.0795817	0.625483	-4.49
2604	10	10	12	YKL065C	YET1	0.210053	9.65341	2.06998	0.0796314	0.625497	-4.49059
951	4	9	7	YJL062W	LAS21	-0.196509	8.92962	-2.06856	0.0797949	0.626405	-4.49254
12547	47	3	3	YDR105C	TMS1	0.183148	8.09344	2.06801	0.0798577	0.626475	-4.49329
3185	12	13	1	YMR246W	FAA4	0.341842	10.6955	2.06736	0.0799332	0.626475	-4.49419
12396	46	10	12	YKL192C	ACP1	0.248553	9.95278	2.06723	0.0799479	0.626475	-4.49437
2042	8	9	10	YJL204C	RCY1	-0.193027	7.52769	-2.06582	0.08011	0.627368	-4.49629
5342	20	11	14	YLR103C	CDC45	-0.28087	7.99702	-2.06509	0.0801949	0.627657	-4.4973
303	2	2	15	YBR155W	CNS1	0.181086	8.06202	2.0646	0.0802514	0.627722	-4.49797
8334	31	11	14	YLR398C	SKI2	-0.180953	8.33157	-2.06308	0.0804268	0.62834	-4.50004
5662	21	14	14	YOR010C	TIR2	-0.181734	9.98176	-2.06205	0.0805469	0.628902	-4.50146
7327	27	16	15	YPL246C	RBD2	0.231308	9.19751	2.06092	0.0806783	0.629551	-4.50301
12587	47	5	11	YFL038C	YPT1	-0.193002	9.41132	-2.05993	0.0807938	0.630076	-4.50436
12936	48	10	8	YKL193C	SDS22	0.201948	8.3271	2.05932	0.0808639	0.630246	-4.50519
7814	29	13	6	YNL220W	ADE12	-0.184193	8.81069	-2.05857	0.0809517	0.630553	-4.50622
3667	14	9	3	YJL169W	YJL169W	-0.180446	7.2626	-2.05765	0.0810589	0.630826	-4.50748
8599	32	11	7	YLR163C	MAS1	-0.242585	8.22211	-2.05734	0.0810957	0.630826	-4.50791
2142	8	15	14	YOR185C	GSP2	0.411462	9.38943	2.05682	0.0811569	0.630826	-4.50862
9124	34	10	4	YKL093W	MBR1	0.180279	7.3195	2.05647	0.0811974	0.630826	-4.5091
319	2	3	15	YDL021W	GPM2	0.186077	7.34607	2.05579	0.0812774	0.630831	-4.51003
3789	14	16	13	YPL183C	RTT10	0.189141	8.13299	2.05523	0.0813431	0.630965	-4.5108
10377	39	3	9	YDR141C	DOP1	-0.198316	8.71963	-2.05386	0.0815033	0.631373	-4.51267
9060	34	6	4	YGL002W	ERP6	-0.197317	7.48941	-2.05318	0.0815838	0.631373	-4.5136
8653	32	14	13	YNR068C	YNR068C	0.182719	7.36111	2.05282	0.081626	0.631373	-4.51409
5188	20	2	4	YBR175W	SWD3	-0.222208	8.44538	-2.05159	0.0817707	0.631373	-4.51578
12562	47	4	2	YDR536W	STL1	0.198624	6.83047	2.05136	0.0817976	0.631373	-4.51609
10731	40	8	11	YIL024C	YIL024C	-0.180544	7.32532	-2.05121	0.081815	0.631373	-4.51629
7112	27	3	8	YDL239C	ADY3	-0.179637	7.0244	-2.05053	0.0818959	0.631373	-4.51723
12600	47	6	8	YGR032W	GSC2	-0.19119	10.0022	-2.05045	0.0819056	0.631373	-4.51734
11463	43	3	7	YDR007W	TRP1	-0.178809	8.40787	-2.05011	0.0819453	0.631373	-4.5178
2956	11	15	12	YOR243C	PUS7	0.185607	9.58276	2.04967	0.081997	0.631373	-4.5184
9702	36	12	6	YML035C	AMD1	0.187892	8.48073	2.04917	0.0820561	0.631373	-4.51908
5180	20	1	12	YAL020C	ATS1	-0.193936	7.73936	-2.04906	0.082069	0.631373	-4.51923
9878	37	6	6	YGR073C	YGR073C	-0.205274	7.4551	-2.04879	0.0821013	0.631373	-4.5196
8139	30	16	11	YPL153C	RAD53	0.183695	7.80489	2.04862	0.0821215	0.631373	-4.51984
10221	38	10	13	YKR005C	YKR005C	0.182397	6.70172	2.04786	0.0822109	0.631688	-4.52087
71	1	5	7	YER101C	AST2	-0.208664	8.97486	-2.04648	0.0823753	0.631997	-4.52277
8518	32	6	6	YGL135W	RPL1b	0.54089	12.4354	2.04646	0.0823771	0.631997	-4.52279
3196	12	13	12	YMR195W	ICY1	0.286679	7.79151	2.04626	0.0824011	0.631997	-4.52306
7771	29	10	11	YLL037W	YLL037W	-0.253315	7.63054	-2.04589	0.0824449	0.631997	-4.52357
3195	12	13	11	YMR195W	ICY1	0.254611	8.0873	2.04495	0.0825572	0.632486	-4.52486
2633	10	12	9	YML012W	ERV25	0.179357	10.3329	2.04428	0.082637	0.632641	-4.52577
185	1	12	9	YMR053C	STB2	-0.189494	7.4248	-2.04373	0.082702	0.632641	-4.52652
12034	45	5	2	YFR021W	ATG18	0.196816	7.91546	2.04273	0.0828213	0.632641	-4.52789
8455	32	2	7	YBR277C	YBR277C	0.340508	7.14754	2.04272	0.0828229	0.632641	-4.5279
5384	20	14	8	YNL259C	ATX1	-0.184045	8.55394	-2.04241	0.0828604	0.632641	-4.52833
10812	40	13	12	YMR312W	ELP6	-0.192782	8.60295	-2.04234	0.0828683	0.632641	-4.52843
7122	27	4	2	YDR424C	DYN2	-0.184551	7.97783	-2.04073	0.0830608	0.633278	-4.53062
2316	9	9	12	YJR036C	HUL4	-0.189827	7.23751	-2.04041	0.0830996	0.633278	-4.53107
6465	24	14	1	YNR066C	YNR066C	0.193119	6.80191	2.03956	0.0832006	0.633278	-4.53222
12331	46	6	11	YGL102C	YGL102C	-0.17948	11.8018	-2.03952	0.0832052	0.633278	-4.53227
8553	32	8	9	YIL064W	SEE1	-0.258605	8.5154	-2.03922	0.0832412	0.633278	-4.53268
4175	16	6	15	YGL067W	NPY1	-0.195286	8.48853	-2.03921	0.083243	0.633278	-4.5327
12199	45	15	7	YOR373W	NUD1	0.196263	8.09411	2.03781	0.0834109	0.634185	-4.53461
2731	11	1	11	YBL090W	MRP21	-0.178815	7.85137	-2.03663	0.0835531	0.634896	-4.53623
4354	17	1	2	YBR035C	PDX3	-0.196979	8.07148	-2.03533	0.0837099	0.635172	-4.538
9244	34	17	12	YPR170C	YPR170C	-0.19785	7.10128	-2.03462	0.083795	0.635172	-4.53897
2810	11	6	10	YGL213C	SKI8	-0.178516	8.08344	-2.03457	0.0838017	0.635172	-4.53904
6072	23	6	8	YGR008C	STF2	0.280999	8.18842	2.03445	0.0838158	0.635172	-4.5392
4646	18	2	6	YBR222C	PCS60	-0.191661	8.51394	-2.03431	0.0838327	0.635172	-4.53939
1601	6	16	1	YPL181W	CTI6	0.196948	8.0643	2.0334	0.0839433	0.635573	-4.54064
6346	24	6	10	YGL125W	MET13	0.180894	8.45643	2.03307	0.0839831	0.635573	-4.54109
5539	21	7	3	YHR047C	AAP1	-0.201234	8.17156	-2.03153	0.0841699	0.636563	-4.5432
2906	11	12	10	YMR060C	SAM37	0.178586	7.91564	2.0308	0.0842581	0.636563	-4.54419
3946	15	9	10	YKL016C	ATP7	0.186379	8.83152	2.03078	0.0842604	0.636563	-4.54421
12448	46	13	16	YMR317W	YMR317W	-0.293162	8.64471	-2.03018	0.0843337	0.636749	-4.54504
10483	39	10	3	YLL048C	YBT1	0.207072	7.19582	2.02907	0.0844688	0.63707	-4.54655
11299	42	10	3	YKL100C	YKL100C	0.224715	8.08787	2.02903	0.0844739	0.63707	-4.54661
11096	41	14	8	YOL059W	GPD2	0.191889	10.3385	2.02829	0.0845632	0.637375	-4.54761
7107	27	3	3	YDL241W	YDL241W	-0.178087	6.55092	-2.02723	0.0846934	0.637444	-4.54907
11301	42	10	5	YKL146W	AVT3	0.176704	8.00953	2.02619	0.0848205	0.637832	-4.55049
4169	16	6	9	YGL117W	YGL117W	-0.176754	7.41993	-2.02575	0.0848737	0.637832	-4.55108
3158	12	11	6	YLR099C	ICT1	-0.231775	9.093	-2.02504	0.0849603	0.637832	-4.55205
11346	42	13	2	YMR280C	CAT8	-0.186376	6.04789	-2.02475	0.0849959	0.637832	-4.55244
11462	43	3	6	YDR055W	PST1	0.229295	8.49094	2.0246	0.085015	0.637832	-4.55266
10978	41	7	2	YHR024C	MAS2	0.190776	8.17646	2.02355	0.0851439	0.638432	-4.55409
7567	28	14	15	YNL263C	YIF1	-0.3743	9.38173	-2.02215	0.0853159	0.639299	-4.556
9489	35	16	1	YPR025C	CCL1	0.182186	7.67894	2.02148	0.0853972	0.639299	-4.5569
2868	11	10	4	YKR034W	DAL80	0.229364	12.3783	2.02127	0.0854238	0.639299	-4.5572
12169	45	13	9	YNL234W	YNL234W	0.226837	7.38437	2.02101	0.0854555	0.639299	-4.55755
7144	27	5	8	YER123W	YCK3	0.175981	8.74282	2.01777	0.0858559	0.639704	-4.56197
9291	35	3	11	YDL245C	HXT15	0.184885	6.96666	2.01775	0.0858584	0.639704	-4.562
1949	8	3	13	YDL163W	YDL163W	0.50161	7.0958	2.01774	0.08586	0.639704	-4.56202
3334	13	5	6	YFL057C	AAD16	-0.175932	8.34195	-2.01735	0.0859081	0.639704	-4.56255
11380	42	15	4	YOR088W	YOR088W	0.175938	7.62416	2.01721	0.0859253	0.639704	-4.56274
9439	35	12	15	YMR035W	IMP2	-0.194798	8.35097	-2.01709	0.0859396	0.639704	-4.56289
2340	9	11	4	YLR246W	ERF2	0.179606	8.42018	2.01686	0.0859683	0.639704	-4.56321
3854	15	3	14	YDR115W	YDR115W	-0.17585	8.19125	-2.01646	0.086018	0.639704	-4.56376
822	4	1	6	YAL053W	FLC2	0.193952	7.89885	2.01596	0.0860797	0.639704	-4.56444
3432	13	11	8	YLR339C	YLR339C	-0.179596	10.5804	-2.01559	0.0861262	0.639704	-4.56495
1720	7	6	8	YGL255W	ZRT1	-0.430529	10.9149	-2.01556	0.0861299	0.639704	-4.56499
10558	39	14	14	YOR025W	HST3	0.176288	8.5597	2.01551	0.0861354	0.639704	-4.56505
4135	16	4	7	YDR262W	YDR262W	-0.175746	9.47553	-2.01505	0.0861932	0.639704	-4.56568
10673	40	5	1	YER087W	AIM10	0.17576	7.97882	2.01479	0.0862251	0.639704	-4.56603
2480	10	2	16	YBR162W-A	YSY6	-0.178472	8.96549	-2.01463	0.0862451	0.639704	-4.56625
11405	42	16	13	YPL119C	DBP1	0.179188	6.68716	2.01335	0.0864051	0.640392	-4.568
4353	17	1	1	YBR035C	PDX3	-0.196355	8.27288	-2.0131	0.0864359	0.640392	-4.56834
12371	46	9	3	YJL201W	ECM25	0.175564	7.78238	2.01237	0.0865263	0.640577	-4.56933
395	2	8	11	YHR121W	LSM12	-0.176271	7.99539	-2.01191	0.0865846	0.640577	-4.56997
3043	12	4	3	YDR169C	STB3	0.18441	8.32247	2.01172	0.0866082	0.640577	-4.57022
12563	47	4	3	YDR488C	PAC11	0.202745	7.50103	2.00964	0.0868675	0.64213	-4.57305
6641	25	8	1	YIL165C	YIL165C	-0.190981	7.43277	-2.00821	0.0870476	0.642932	-4.57501
10766	40	10	14	YKR004C	ECM9	-0.230818	8.34795	-2.00783	0.0870952	0.642932	-4.57553
2098	8	13	2	YNL004W	HRB1	0.210209	9.27866	2.00742	0.0871465	0.642932	-4.57608
4333	16	16	13	YPL182C	YPL182C	0.187744	6.85341	2.00616	0.0873051	0.642932	-4.5778
11857	44	11	1	YLR133W	CKI1	0.232632	9.17789	2.00558	0.0873782	0.642932	-4.57859
11900	44	13	12	YMR227C	TAF7	0.203866	8.26962	2.00486	0.0874687	0.642932	-4.57957
9676	36	10	12	YKL088W	CAB3	0.175135	7.49443	2.00465	0.087495	0.642932	-4.57985
8637	32	13	13	YNL022C	YNL022C	0.192091	8.76601	2.0046	0.0875011	0.642932	-4.57992
9458	35	14	2	YOL101C	IZH4	-0.18018	9.05984	-2.0046	0.0875013	0.642932	-4.57992
497	2	15	1	YOR096W	RPS7a	-0.1855	11.3493	-2.0046	0.0875013	0.642932	-4.57992
6937	26	9	9	YJL133W	MRS3	-0.19205	8.3336	-2.00368	0.0876167	0.642933	-4.58117
4312	16	15	8	YOR149C	SMP3	0.198868	7.99908	2.00169	0.0878693	0.643756	-4.58389
7054	26	16	14	YPL103C	FMP30	0.175568	6.92032	2.00108	0.0879459	0.643756	-4.58471
10332	38	17	12	YPR186C	PZF1	0.246152	7.42599	2.00085	0.0879759	0.643756	-4.58503
12699	47	12	11	YMR136W	GAT2	0.178561	7.55259	2.00074	0.0879895	0.643756	-4.58518
3193	12	13	9	YMR243C	ZRC1	0.178304	10.3307	2.00046	0.0880248	0.643756	-4.58556
7734	29	8	6	YJL038C	LOH1	0.174552	6.14875	1.99969	0.088122	0.643831	-4.5866
1018	4	13	10	YMR235C	RNA1	0.198031	9.51455	1.99921	0.0881837	0.643831	-4.58726
12559	47	3	15	YDR099W	BMH2	0.179274	10.0187	1.99862	0.0882591	0.643831	-4.58807
6477	24	14	13	YNR060W	FRE4	-0.224986	7.84355	-1.9979	0.0883501	0.643831	-4.58904
145	1	10	1	YKR075C	YKR075C	-0.175338	7.33484	-1.99764	0.0883828	0.643831	-4.58939
11019	41	9	11	YJR068W	RFC2	0.180186	7.3901	1.99709	0.0884534	0.643831	-4.59015
9874	37	6	2	YGR075C	PRP38	-0.222477	7.76286	-1.997	0.0884644	0.643831	-4.59026
6683	25	10	11	YKR047W	YKR047W	-0.185777	6.52846	-1.99671	0.0885019	0.643831	-4.59066
1205	5	8	5	YJL014W	CCT3	0.176548	9.50609	1.9965	0.0885286	0.643831	-4.59095
11242	42	6	10	YGL054C	ERV14	-0.176701	8.72787	-1.99574	0.0886261	0.644181	-4.59199
11025	41	10	1	YLL009C	COX17	-0.189413	8.10395	-1.9946	0.0887716	0.644879	-4.59354
12282	46	3	10	YDL206W	YDL206W	0.179409	8.43559	1.99365	0.0888935	0.645406	-4.59483
3462	13	13	6	YNL204C	SPS18	0.173969	7.00498	1.99289	0.0889908	0.645554	-4.59586
11218	42	5	2	YER007C-A	TMA20	-0.193962	7.87284	-1.99261	0.0890257	0.645554	-4.59623
10425	39	6	9	YGR070W	ROM1	-0.228317	8.25442	-1.99233	0.0890624	0.645554	-4.59662
2406	9	15	6	YOR294W	RRS1	0.177642	8.6211	1.99131	0.0891933	0.6456	-4.59801
10442	39	7	10	YHR104W	GRE3	0.230631	8.88116	1.99034	0.0893184	0.6456	-4.59933
12081	45	8	1	YJL057C	IKS1	0.233954	8.86471	1.99012	0.0893461	0.6456	-4.59962
9316	35	5	4	YER133W	GLC7	0.177199	8.90152	1.98976	0.0893928	0.6456	-4.60012
8638	32	13	14	YNL022C	YNL022C	0.179985	8.82504	1.98954	0.089421	0.6456	-4.60041
631	3	6	7	YGL159W	YGL159W	-0.174517	7.58784	-1.98952	0.0894237	0.6456	-4.60044
10379	39	3	11	YDR093W	DNF2	-0.192862	6.21258	-1.98929	0.0894533	0.6456	-4.60076
1598	6	15	14	YOR186W	YOR186W	0.17704	6.77496	1.9888	0.089516	0.6456	-4.60142
4136	16	4	8	YDR262W	YDR262W	-0.173569	9.37112	-1.98853	0.089551	0.6456	-4.60179
2785	11	5	1	YER157W	COG3	-0.174711	7.83046	-1.98844	0.0895636	0.6456	-4.60192
51	1	4	3	YDR353W	TRR1	-0.173468	11.3352	-1.98781	0.0896447	0.645828	-4.60277
4244	16	11	4	YLR149C	YLR149C	0.26546	10.2637	1.98707	0.0897398	0.646156	-4.60377
1478	6	8	6	YIL043C	CBR1	-0.173206	10.2383	-1.98571	0.089916	0.64705	-4.60562
8575	32	9	15	YJL178C	ATG27	-0.176075	9.70697	-1.98528	0.0899716	0.64705	-4.60621
6258	24	1	2	YBL054W	TOD6	0.240916	7.94414	1.98458	0.090062	0.64705	-4.60715
7466	28	8	10	YHR190W	ERG9	0.243885	10.388	1.98458	0.0900623	0.64705	-4.60716
5295	20	8	15	YHR134W	WSS1	-0.184788	8.11617	-1.98412	0.0901224	0.647104	-4.60778
2105	8	13	9	YMR326C	YMR326C	-0.220925	6.51885	-1.98376	0.090169	0.647104	-4.60827
507	2	15	11	YOR044W	IRC23	0.180118	8.03863	1.98244	0.0903407	0.647751	-4.61007
10143	38	5	15	YER039C	HVG1	-0.201387	7.05855	-1.9823	0.0903585	0.647751	-4.61025
3135	12	9	15	YJL066C	MPM1	0.268613	8.28533	1.98142	0.0904731	0.648217	-4.61145
11888	44	12	16	YLR462W	YLR462W	0.174433	9.96054	1.98097	0.0905324	0.648286	-4.61206
7840	29	14	16	YOL136C	PFK27	0.215443	7.93303	1.97913	0.0907721	0.649645	-4.61456
11984	45	1	16	YBR099C	YBR099C	-0.189231	7.16888	-1.9777	0.0909598	0.650632	-4.6165
1191	5	7	7	YHR030C	SLT2	0.179066	8.20996	1.97523	0.0912845	0.652596	-4.61986
6929	26	9	1	YJL137C	GLG2	0.174099	6.75992	1.97307	0.0915682	0.653505	-4.62279
10767	40	10	15	YKL181W	PRS1	-0.254254	10.4339	-1.97301	0.0915773	0.653505	-4.62288
7856	29	15	16	YOR353C	SOG2	0.172043	7.732	1.97293	0.0915875	0.653505	-4.62298
11053	41	11	13	YLR319C	BUD6	0.173103	7.47102	1.97274	0.0916119	0.653505	-4.62324
12345	46	7	9	YGR271W	SLH1	-0.173051	8.36405	-1.97212	0.0916943	0.653696	-4.62408
3945	15	9	9	YKL016C	ATP7	0.187312	9.22952	1.97178	0.0917389	0.653696	-4.62454
12090	45	8	10	YJL053W	PEP8	0.174855	8.00671	1.9706	0.0918951	0.654376	-4.62614
9535	36	1	15	YAL034C	FUN19	0.185614	8.59592	1.96976	0.0920062	0.654376	-4.62728
5961	22	16	9	YPL193W	RSA1	0.189141	7.26192	1.9696	0.0920283	0.654376	-4.62751
8078	30	12	14	YML115C	VAN1	-0.172367	8.99121	-1.96896	0.0921133	0.654376	-4.62838
8546	32	8	2	YIL068C	SEC6	0.215959	7.8156	1.96867	0.0921506	0.654376	-4.62876
6283	24	2	11	YBR267W	REI1	-0.2418	8.29419	-1.96761	0.0922917	0.654376	-4.6302
10506	39	11	10	YLR408C	BLS1	-0.188495	7.26757	-1.96758	0.0922965	0.654376	-4.63025
11939	44	16	3	YPL076W	GPI2	0.19255	6.98346	1.9668	0.0923994	0.654376	-4.6313
5249	20	6	1	YGL033W	HOP2	0.185838	6.37372	1.96675	0.0924062	0.654376	-4.63137
7937	30	4	1	YDR329C	PEX3	0.171945	7.23276	1.96658	0.0924287	0.654376	-4.63159
3097	12	7	9	YGR142W	BTN2	-0.185527	7.89392	-1.96629	0.0924671	0.654376	-4.63199
11303	42	10	7	YKL098W	MTC2	0.177313	7.62647	1.96623	0.0924763	0.654376	-4.63208
3146	12	10	10	YKL111C	YKL111C	-0.196973	7.38557	-1.96615	0.0924864	0.654376	-4.63218
10763	40	10	11	YKL183W	LOT5	-0.171664	7.92313	-1.96514	0.0926204	0.654872	-4.63354
1390	6	2	14	YBR298C	MAL31	-0.173064	7.40534	-1.96458	0.0926952	0.654872	-4.6343
2146	8	16	2	YPL180W	TCO89	0.19883	7.69992	1.96448	0.0927089	0.654872	-4.63444
7670	29	4	6	YDR519W	FPR2	-0.208515	8.88894	-1.9641	0.0927599	0.654872	-4.63496
8802	33	7	2	YHR016C	YSC84	0.181922	7.0555	1.96348	0.0928432	0.654872	-4.63581
9003	34	2	11	YBR188C	NTC20	-0.210189	7.48718	-1.96322	0.0928781	0.654872	-4.63616
6386	24	9	2	YJL225C	YJL225C	0.179643	7.7119	1.96269	0.0929488	0.654872	-4.63688
2064	8	10	16	YKL149C	DBR1	0.270761	7.39432	2.02248	0.0929581	0.654872	-4.31978
5028	19	9	4	YJR047C	ANB1	0.283174	11.2304	1.96204	0.0930354	0.655064	-4.63775
5027	19	9	3	YJR047C	ANB1	0.268112	11.3649	1.96111	0.0931602	0.655588	-4.63901
2942	11	14	14	YOL070C	NBA1	0.187851	8.53654	1.95903	0.0934401	0.657083	-4.64184
2683	10	15	11	YOR052C	YOR052C	0.192455	9.2509	1.95842	0.0935218	0.657083	-4.64266
5830	22	8	6	YIL059C	YIL059C	-0.179363	7.21602	-1.95796	0.0935837	0.657083	-4.64328
9741	36	14	13	YNL319W	YNL319W	-0.173772	7.06726	-1.95751	0.0936453	0.657083	-4.6439
12806	48	2	6	YCL040W	GLK1	0.370189	10.2361	1.95729	0.0936748	0.657083	-4.6442
5802	22	6	10	YGL126W	SCS3	-0.22867	8.40957	-1.95685	0.0937334	0.657141	-4.64478
6188	23	13	12	YNL161W	CBK1	0.180597	8.271	1.95624	0.0938158	0.657366	-4.64561
2470	10	2	6	YBR214W	SDS24	-0.193114	8.81007	-1.95561	0.0939013	0.657611	-4.64647
2527	10	5	15	YEL002C	WBP1	0.181709	9.7835	1.95507	0.093974	0.657768	-4.64719
11576	43	10	8	YKR064W	OAF3	0.179754	6.88007	1.95461	0.0940363	0.657851	-4.64782
11750	44	4	6	YDR246W	TRS23	-0.173175	7.5381	-1.95413	0.0941025	0.657961	-4.64848
1852	7	14	12	YOL113W	SKM1	0.176242	7.86428	1.95278	0.0942854	0.658534	-4.65031
2676	10	15	4	YOR056C	NOB1	0.213106	8.30204	1.95135	0.0944801	0.659188	-4.65224
12688	47	11	16	YLR366W	YLR366W	0.409646	6.71065	1.9495	0.0947312	0.660587	-4.65474
4792	18	11	8	YLR060W	FRS1	0.179235	9.93739	1.94887	0.0948183	0.660841	-4.6556
3157	12	11	5	YLR099C	ICT1	-0.200323	9.1703	-1.94743	0.0950151	0.661859	-4.65755
2763	11	3	11	YDL221W	YDL221W	-0.172472	6.88516	-1.94509	0.0953355	0.663209	-4.66071
8617	32	12	9	YML116W	ATR1	-0.172853	7.6694	-1.9449	0.0953614	0.663209	-4.66097
8618	32	12	10	YML116W	ATR1	-0.22748	7.78808	-1.94418	0.0954605	0.663545	-4.66194
2175	8	17	15	YPR147C	YPR147C	-0.19054	8.70754	-1.94222	0.0957305	0.664914	-4.6646
617	3	5	9	YER145C	FTR1	-0.187398	10.4594	-1.94192	0.0957712	0.664914	-4.665
10345	39	1	9	YBR140C	IRA1	-0.204804	7.88548	-1.94162	0.0958129	0.664914	-4.6654
6096	23	7	16	YHR040W	BCD1	0.169329	7.19467	1.94092	0.0959102	0.664914	-4.66636
8545	32	8	1	YIL068C	SEC6	0.200101	7.96708	1.9409	0.0959123	0.664914	-4.66638
12474	46	15	10	YOR228C	YOR228C	0.175054	7.51317	1.94003	0.0960326	0.665394	-4.66755
11982	45	1	14	YBR147W	RTC2	0.190912	6.55831	1.93816	0.0962918	0.666738	-4.67008
5636	21	13	4	YNL166C	BNI5	0.174891	8.06142	1.93757	0.0963738	0.666738	-4.67088
7617	29	1	1	YBR137W	YBR137W	-0.333757	8.45724	-1.93752	0.0963798	0.666738	-4.67094
2941	11	14	13	YOL070C	NBA1	0.17743	8.6205	1.93702	0.0964493	0.666865	-4.67162
936	4	8	8	YHR122W	CIA2	-0.168896	8.48611	-1.9365	0.0965223	0.666868	-4.67233
11340	42	12	12	YLR465C	YLR465C	-0.173734	7.62933	-1.93614	0.0965724	0.666868	-4.67282
10171	38	7	11	YGR215W	RSM27	-0.187564	7.5902	-1.93592	0.0966032	0.666868	-4.67312
11500	43	5	12	YER137C	YER137C	-0.181245	6.99503	-1.93417	0.0968471	0.668199	-4.67548
12183	45	14	7	YOL156W	HXT11	-0.168883	7.65284	-1.9313	0.097248	0.669081	-4.67936
8853	33	10	5	YKR105C	VBA5	0.168504	8.79469	1.93107	0.0972797	0.669081	-4.67966
11136	41	16	16	YPL263C	KEL3	0.201197	9.06508	1.93096	0.0972949	0.669081	-4.67981
894	4	5	14	YEL040W	UTR2	-0.196786	10.6808	-1.93068	0.0973346	0.669081	-4.68019
6218	23	15	10	YOR394W	PAU21	-0.202974	8.20699	-1.93043	0.0973701	0.669081	-4.68053
3201	12	14	1	YNL301C	RPL18b	0.287741	12.0962	1.9304	0.0973735	0.669081	-4.68057
9533	36	1	13	YAR019C	CDC15	0.193692	7.97082	1.93039	0.0973748	0.669081	-4.68058
12181	45	14	5	YOR038C	HIR2	-0.22569	8.65395	-1.92981	0.0974568	0.669081	-4.68137
11871	44	11	15	YLR079W	SIC1	0.253602	9.25307	1.92967	0.0974756	0.669081	-4.68155
12174	45	13	14	YNL232W	CSL4	0.175893	9.85544	1.92932	0.097526	0.669081	-4.68203
1944	8	3	8	YDL120W	YFH1	0.173224	9.22589	1.92888	0.0975869	0.669081	-4.68262
9642	36	8	10	YHR198C	AIM18	0.215486	8.52133	1.92844	0.0976488	0.669081	-4.68321
9984	37	12	16	YMR128W	ECM16	-0.168431	8.13037	-1.92819	0.0976834	0.669081	-4.68355
1979	8	5	11	YER009W	NTF2	-0.185456	11.0274	-1.92813	0.0976929	0.669081	-4.68364
9027	34	4	3	YDR193W	YDR193W	0.180313	6.34383	1.92767	0.0977575	0.669172	-4.68426
5391	20	14	15	YNL255C	GIS2	0.290476	10.7719	1.92722	0.0978204	0.669252	-4.68486
11311	42	10	15	YKL095W	YJU2	-0.177943	6.53724	-1.92677	0.0978836	0.669333	-4.68547
5641	21	13	9	YNL210W	MER1	-0.180255	6.81248	-1.92615	0.0979715	0.669356	-4.68631
9331	35	6	3	YGL193C	YGL193C	-0.265393	7.80909	-1.98238	0.0981096	0.669356	-4.36929
4392	17	3	8	YDL232W	OST4	-0.208471	7.57579	-1.92501	0.0981325	0.669356	-4.68785
8477	32	3	13	YDL187C	YDL187C	-0.168126	6.13807	-1.92493	0.0981435	0.669356	-4.68795
3580	14	3	12	YDL127W	PCL2	0.202337	7.39035	1.92422	0.098244	0.669691	-4.68891
5194	20	2	10	YBR219C	YBR219C	-0.206037	8.65882	-1.92282	0.0984419	0.669729	-4.6908
1366	6	1	6	YBL037W	APL3	-0.176525	7.09797	-1.92281	0.0984441	0.669729	-4.69082
5055	19	10	15	YKR036C	CAF4	0.320162	9.30041	1.92257	0.098478	0.669729	-4.69114
8087	30	13	7	YMR306W	FKS3	-0.181448	6.20432	-1.92245	0.098495	0.669729	-4.6913
643	3	7	3	YGR282C	BGL2	0.168169	10.8399	1.92237	0.0985062	0.669729	-4.69141
1605	6	16	5	YPL179W	PPQ1	0.184415	9.91192	1.9217	0.0986013	0.670026	-4.69231
12787	48	1	3	YBL030C	PET9	0.182661	9.58554	1.92022	0.098812	0.670797	-4.69431
11789	44	6	13	YGL051W	MST27	-0.167872	8.08412	-1.92004	0.0988372	0.670797	-4.69455
6406	24	10	6	YKL217W	JEN1	0.167413	7.82148	1.91967	0.0988896	0.670797	-4.69505
586	3	3	10	YDR013W	PSF1	-0.172297	8.31564	-1.91946	0.0989203	0.670797	-4.69534
8603	32	11	11	YLR161W	YLR161W	0.185371	6.91188	1.91719	0.0992433	0.671451	-4.69839
10944	41	4	16	YDR387C	YDR387C	0.170838	7.32267	1.9167	0.099314	0.671451	-4.69906
7492	28	10	4	YKL084W	HOT13	-0.197756	7.57135	-1.91624	0.0993789	0.671451	-4.69967
2090	8	12	10	YML095C	RAD10	-0.169698	6.91468	-1.91588	0.099431	0.671451	-4.70016
10908	41	2	12	YCR002C	CDC10	-0.172231	8.76463	-1.91577	0.0994472	0.671451	-4.70032
9457	35	14	1	YOL101C	IZH4	-0.177774	9.24807	-1.91558	0.0994743	0.671451	-4.70057
8454	32	2	6	YCL024W	KCC4	0.263387	7.45505	1.91464	0.099608	0.671451	-4.70183
6805	26	1	5	YAR014C	BUD14	0.19395	9.40712	1.91463	0.0996105	0.671451	-4.70185
6532	25	1	4	YBL109W	YBL109W	-0.169743	7.16565	-1.91447	0.0996327	0.671451	-4.70206
5365	20	13	5	YMR253C	YMR253C	0.168763	7.85648	1.91446	0.0996344	0.671451	-4.70208
9050	34	5	10	YEL074W	YEL074W	-0.192106	9.70863	-1.9136	0.0997575	0.671855	-4.70323
2177	9	1	1	YBR027C	YBR027C	-0.17665	6.62818	-1.91309	0.0998311	0.671855	-4.70392
9159	34	12	7	YLR459W	GAB1	0.167915	9.37084	1.91243	0.0999256	0.671878	-4.70481
10509	39	11	13	YLR406C	RPL31b	-0.171735	6.60337	-1.91148	0.100063	0.671878	-4.7061
12976	48	12	16	YML085C	TUB1	0.183707	8.08073	1.91107	0.100122	0.671878	-4.70664
12351	46	7	15	YGR221C	TOS2	0.166634	8.2701	1.91076	0.100166	0.671878	-4.70706
10070	38	1	6	YBL069W	AST1	0.183558	6.4399	1.91015	0.100254	0.671878	-4.70788
5526	21	6	6	YGR057C	LST7	-0.168273	7.8439	-1.90864	0.100472	0.671878	-4.70991
2634	10	12	10	YML012W	ERV25	0.170424	10.2234	1.90827	0.100526	0.671878	-4.71041
11855	44	10	15	YKL094W	YJU3	-0.192326	10.1353	-1.90737	0.100656	0.671878	-4.71162
10894	41	1	14	YBR053C	YBR053C	0.166365	8.05045	1.90679	0.10074	0.671878	-4.71241
11298	42	10	2	YKL148C	SDH1	0.168349	7.38548	1.90678	0.100742	0.671878	-4.71242
6593	25	5	1	YER174C	GRX4	-0.17296	8.30076	-1.90672	0.100751	0.671878	-4.71251
12626	47	8	2	YJL056C	ZAP1	0.176738	8.86474	1.90612	0.100838	0.671878	-4.71331
1611	6	16	11	YPL129W	TAF14	0.188192	8.31268	1.90588	0.100872	0.671878	-4.71363
2603	10	10	11	YKL065C	YET1	0.206063	9.73317	1.90586	0.100875	0.671878	-4.71366
7402	28	4	10	YDR228C	PCF11	0.209392	7.83312	1.90542	0.100939	0.671878	-4.71425
5110	19	14	6	YOL083W	ATG34	0.175281	7.6588	1.90488	0.101018	0.671878	-4.71498
10381	39	3	13	YDR139C	RUB1	-0.252016	7.78555	-1.90458	0.101061	0.671878	-4.71538
2075	8	11	11	YLR137W	RKM5	-0.247091	7.86456	-1.9043	0.101102	0.671878	-4.71576
10755	40	10	3	YKL187C	FAT3	0.214756	7.32641	1.90363	0.101199	0.671878	-4.71666
6381	24	8	13	YIL054W	YIL054W	-0.196633	6.03668	-1.90357	0.101209	0.671878	-4.71675
1799	7	11	7	YLR330W	CHS5	0.215684	9.06901	1.90311	0.101276	0.671878	-4.71736
6273	24	2	1	YCL018W	LEU2	-0.166497	8.66064	-1.90309	0.101278	0.671878	-4.71738
2544	10	6	16	YFR030W	MET10	-0.166099	7.63086	-1.90304	0.101285	0.671878	-4.71745
11980	45	1	12	YBR101C	FES1	-0.167117	9.15384	-1.90197	0.101442	0.671878	-4.7189
12678	47	11	6	YLR418C	CDC73	-0.165969	8.41675	-1.90176	0.101473	0.671878	-4.71918
5251	20	6	3	YFR042W	KEG1	-0.165932	8.98826	-1.90158	0.101499	0.671878	-4.71942
1201	5	8	1	YJL016W	YJL016W	0.169457	9.2714	1.90147	0.101514	0.671878	-4.71956
2141	8	15	13	YOR185C	GSP2	0.375019	9.5363	1.90145	0.101517	0.671878	-4.71959
12712	47	13	8	YNL187W	SWT21	0.165771	8.12004	1.90103	0.101579	0.671878	-4.72016
9835	37	3	11	YDR094W	YDR094W	-0.277448	7.66479	-1.90005	0.101722	0.671878	-4.72147
1175	5	6	7	YGL256W	ADH4	-0.166504	8.93319	-1.89998	0.101732	0.671878	-4.72157
8383	31	14	15	YOL135C	MED7	0.182611	7.51047	1.89945	0.10181	0.671878	-4.72229
10095	38	2	15	YBR282W	MRPL27	-0.169732	7.62703	-1.89918	0.101849	0.671878	-4.72265
10510	39	11	14	YLR406C	RPL31b	-0.174758	6.64077	-1.89892	0.101887	0.671878	-4.72299
4451	17	7	3	YHL003C	LAG1	0.168446	7.74463	1.89881	0.101903	0.671878	-4.72314
3202	12	14	2	YNL301C	RPL18b	0.276013	12.0895	1.89819	0.101995	0.671878	-4.72398
3544	14	1	8	YAR074C	YAR074C	-0.165434	8.15364	-1.89713	0.10215	0.671878	-4.7254
5368	20	13	8	YMR205C	PFK2	0.285648	11.0334	1.89662	0.102225	0.671878	-4.72609
9774	36	16	14	YPL110C	GDE1	0.172417	8.47334	1.89559	0.102377	0.671878	-4.72747
10687	40	5	15	YER038C	KRE29	0.19025	7.03168	1.89556	0.102382	0.671878	-4.72752
2506	10	4	10	YDR213W	UPC2	-0.166451	9.17279	-1.89556	0.102382	0.671878	-4.72752
12409	46	11	9	YLR226W	BUR2	0.172956	7.63138	1.89527	0.102424	0.671878	-4.72791
9666	36	10	2	YKL139W	CTK1	0.180056	7.44482	1.89517	0.102439	0.671878	-4.72804
9559	36	3	7	YDL056W	MBP1	-0.186801	7.61261	-1.89484	0.102488	0.671878	-4.72849
12676	47	11	4	YLR372W	SUR4	0.1681	10.5494	1.89459	0.102524	0.671878	-4.72881
6015	23	2	15	YCR068W	ATG15	0.22204	7.50791	1.89427	0.102572	0.671878	-4.72926
12536	47	2	8	YCR097WA	YCR097WA	-0.176065	7.00933	-1.89347	0.10269	0.671878	-4.73032
8313	31	10	9	YLR017W	MEU1	0.211688	11.7612	1.89332	0.102713	0.671878	-4.73053
3047	12	4	7	YDR167W	TAF10	-0.17064	8.93288	-1.89276	0.102795	0.671878	-4.73128
4694	18	5	6	YEL060C	PRB1	0.182774	9.07425	1.89252	0.102831	0.671878	-4.7316
10283	38	14	11	YNR031C	SSK2	-0.171736	8.36982	-1.89233	0.102858	0.671878	-4.73185
8883	33	12	3	YMR042W	ARG80	-0.169796	7.15063	-1.89127	0.103016	0.671878	-4.73328
9742	36	14	14	YNL319W	YNL319W	-0.171434	7.12983	-1.89124	0.10302	0.671878	-4.73332
6329	24	5	9	YER068W	MOT2	0.189813	8.82673	1.89044	0.103139	0.671878	-4.7344
9372	35	8	12	YIL120W	QDR1	-0.260356	6.75994	-1.94476	0.103207	0.671878	-4.41565
12270	46	2	14	YCL037C	SRO9	0.21776	10.057	1.88994	0.103213	0.671878	-4.73507
7517	28	11	13	YLR111W	YLR111W	-0.164803	6.34874	-1.88976	0.10324	0.671878	-4.73531
7813	29	13	5	YNL220W	ADE12	-0.169998	8.63959	-1.88949	0.103279	0.671878	-4.73567
4876	18	16	12	YPL049C	DIG1	0.195501	8.05212	1.88944	0.103288	0.671878	-4.73575
10800	40	12	16	YML077W	BET5	-0.164908	8.77804	-1.88939	0.103295	0.671878	-4.73581
186	1	12	10	YMR053C	STB2	-0.173341	7.48984	-1.88928	0.103311	0.671878	-4.73596
636	3	6	12	YGL157W	ARI1	-0.19491	8.81724	-1.88898	0.103356	0.671878	-4.73636
7328	27	16	16	YPL246C	RBD2	0.196556	9.36961	1.88882	0.10338	0.671878	-4.73658
9361	35	8	1	YIL172C	IMA3	0.183243	7.22849	1.8887	0.103397	0.671878	-4.73673
12109	45	9	13	YKL047W	ANR2	0.166145	7.9319	1.88857	0.103416	0.671878	-4.73691
7470	28	8	14	YHR188C	GPI16	-0.307972	9.10754	-1.88845	0.103434	0.671878	-4.73706
2545	10	7	1	YGR147C	NAT2	-0.165904	8.19277	-1.88826	0.103463	0.671878	-4.73732
2907	11	12	11	YMR014W	BUD22	0.165017	8.41004	1.8882	0.103472	0.671878	-4.73741
12895	48	7	15	YGR220C	MRPL9	-0.205614	8.50306	-1.88795	0.103508	0.671878	-4.73774
7597	28	16	13	YPL102C	YPL102C	-0.22362	6.49097	-1.88734	0.103599	0.671959	-4.73856
6265	24	1	9	YBL050W	SEC17	-0.174758	9.28194	-1.88678	0.103684	0.671959	-4.73932
10876	40	17	12	YPR185W	ATG13	0.164533	8.32321	1.88659	0.103712	0.671959	-4.73957
7106	27	3	2	YDR041W	RSM10	-0.164565	8.13962	-1.88637	0.103744	0.671959	-4.73986
10663	40	4	7	YDR286C	YDR286C	-0.188595	7.40572	-1.88614	0.103778	0.671959	-4.74017
10682	40	5	10	YER084W	YER084W	-0.170541	6.46093	-1.88521	0.103917	0.67203	-4.74142
6432	24	11	16	YLR151C	PCD1	-0.170558	6.83252	-1.88466	0.104	0.67203	-4.74216
11246	42	6	14	YGL052W	YGL052W	-0.20474	6.78369	-1.88464	0.104002	0.67203	-4.74218
12286	46	3	14	YDL204W	RTN2	0.194466	7.62616	1.88251	0.104321	0.67203	-4.74504
12744	47	15	8	YOR372C	NDD1	0.237261	9.33276	1.88243	0.104335	0.67203	-4.74516
6877	26	5	13	YEL064C	AVT2	-0.164367	7.37777	-1.88239	0.10434	0.67203	-4.74521
5721	22	1	9	YBL051C	PIN4	0.18976	8.5354	1.88209	0.104384	0.67203	-4.7456
2564	10	8	4	YHR133C	NSG1	-0.16418	8.15464	-1.88208	0.104386	0.67203	-4.74562
2412	9	15	12	YOR244W	ESA1	0.165595	8.00848	1.88178	0.104432	0.67203	-4.74603
3674	14	9	10	YJL213W	YJL213W	-0.16431	8.82478	-1.88163	0.104454	0.67203	-4.74623
11225	42	5	9	YER003C	PMI40	0.181611	9.51465	1.8811	0.104534	0.67203	-4.74694
11491	43	5	3	YER141W	COX15	0.164197	8.58588	1.88002	0.104697	0.67203	-4.74839
7319	27	16	7	YPL250C	ICY2	-0.163982	8.93419	-1.87989	0.104716	0.67203	-4.74856
8778	33	5	10	YER178W	PDA1	-0.195559	9.57832	-1.87964	0.104754	0.67203	-4.7489
9043	34	5	3	YEL031W	SPF1	-0.164242	6.28909	-1.8796	0.104759	0.67203	-4.74894
312	2	3	8	YDL025C	RTK1	0.168278	8.00785	1.87954	0.104769	0.67203	-4.74903
11125	41	16	5	YPR032W	SRO7	0.164442	8.97696	1.87932	0.104801	0.67203	-4.74932
391	2	8	7	YHR123W	EPT1	-0.166289	9.02402	-1.87926	0.104811	0.67203	-4.74941
7566	28	14	14	YNL311C	SKP2	-0.285511	7.83577	-1.87888	0.104868	0.67203	-4.74991
12891	48	7	11	YGR222W	PET54	-0.187621	8.36057	-1.87867	0.1049	0.67203	-4.75019
9034	34	4	10	YDR237W	MRPL7	-0.17233	7.53664	-1.87774	0.105039	0.67203	-4.75144
3751	14	14	7	YNR009W	NRM1	0.175149	8.1455	1.87735	0.105099	0.67203	-4.75197
5195	20	2	11	YBR171W	SEC66	-0.190289	8.92444	-1.87723	0.105117	0.67203	-4.75212
6866	26	5	2	YEL070W	DSF1	0.163693	6.5153	1.87703	0.105147	0.67203	-4.75239
8415	31	16	15	YPR059C	YPR059C	-0.201606	7.82557	-1.87667	0.105202	0.67203	-4.75288
5022	19	8	14	YIL150C	MCM10	0.169737	6.30261	1.87633	0.105254	0.67203	-4.75334
7519	28	11	15	YLR063W	YLR063W	-0.258451	7.01629	-1.87613	0.105283	0.67203	-4.7536
[truncated: 5,568 more rows]
